# Supplementary material for: Comparison of multiple obesity indices for cardiovascular disease risk classification in South Asian adults: The CARRS Study
Source: PubMed Central journal article supplement (PMC5407781; doi:10.1371/journal.pone.0174251), 2017-04-27
Supplement: pone.0174251.s006.pdf [file pone.0174251.s006.pdf]

Participant ID






## **CARRS: Surveillance Study**

**Instruction to the interviewer: HAS THE PARTICIPANT SIGNED THE INFORMED CONSENT? DO NOT PROCEED UNTIL THE CONSENT FORM HAS BEEN SIGNED.**

|                                                                            |                                                                                                                   |
|----------------------------------------------------------------------------|-------------------------------------------------------------------------------------------------------------------|
| Household ID <input style="width: 100%;" type="text"/>                     | Participant ID <input style="width: 100%;" type="text"/>                                                          |
| CEB Code <input style="width: 100%;" type="text"/>                         | Interviewer ID <input style="width: 100%;" type="text"/>                                                          |
| Date of interview: <input style="width: 100%;" type="text"/><br>DD/ MM/ YY | Start Time [Hr:min] <input style="width: 20%;" type="text"/> : <input style="width: 20%;" type="text"/><br>HR MIN |

### SECTION – 1: DEMOGRAPHIC, SOCIO-ECONOMIC AND RESIDENTIAL DETAILS

|                                                                               |                                                             |
|-------------------------------------------------------------------------------|-------------------------------------------------------------|
| <b>1. Name of the Participant:</b><br>First name:<br>Middle Name:<br>Surname: | <hr/><br><hr/><br><hr/>                                     |
| <b>2. Father's/Spouse's name:</b><br>First name:<br>Middle Name:<br>Surname:  | <hr/><br><hr/><br><hr/>                                     |
| <b>3. Address/Details:</b><br>Street:<br>District:<br>State:<br>Postal Code:  | <hr/><br><hr/><br><hr/><br><hr/>                            |
| <b>5. Telephone Number</b><br>Residence<br>Office<br>Mobile                   | <hr/><br><hr/><br><hr/>                                     |
| <b>6. Email ID</b>                                                            | (1)<br>(2)                                                  |
| <b>7. Place of Birth</b><br>District:<br>State:                               | <hr/><br><hr/>                                              |
| <b>8. Age (in completed years)</b>                                            | <input style="width: 100%;" type="text"/>                   |
| <b>9. Date of birth (if available)</b>                                        | <input style="width: 100%;" type="text"/><br>DD / MM / YYYY |

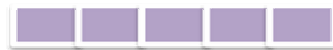

|                                                                                                                                                                           |                                                                                                                                                                                                                                                                                                                                                                                                                                                                                                                                                         |                                                         |    |           |    |         |   |         |    |         |   |         |    |          |   |        |    |       |   |        |    |         |   |       |    |          |   |      |    |          |   |        |    |                                                                               |
|---------------------------------------------------------------------------------------------------------------------------------------------------------------------------|---------------------------------------------------------------------------------------------------------------------------------------------------------------------------------------------------------------------------------------------------------------------------------------------------------------------------------------------------------------------------------------------------------------------------------------------------------------------------------------------------------------------------------------------------------|---------------------------------------------------------|----|-----------|----|---------|---|---------|----|---------|---|---------|----|----------|---|--------|----|-------|---|--------|----|---------|---|-------|----|----------|---|------|----|----------|---|--------|----|-------------------------------------------------------------------------------|
| 10. Sex                                                                                                                                                                   | Male 1<br>Female 2<br>Trans-gender 3                                                                                                                                                                                                                                                                                                                                                                                                                                                                                                                    | <input type="checkbox"/>                                |    |           |    |         |   |         |    |         |   |         |    |          |   |        |    |       |   |        |    |         |   |       |    |          |   |      |    |          |   |        |    |                                                                               |
| 11. What is your marital status?                                                                                                                                          | Single 1<br>Married 2<br>Widow/Widower 3<br>Separated/Divorced 4<br>Others 5                                                                                                                                                                                                                                                                                                                                                                                                                                                                            | <input type="checkbox"/><br>Others, specify<br><hr/>    |    |           |    |         |   |         |    |         |   |         |    |          |   |        |    |       |   |        |    |         |   |       |    |          |   |      |    |          |   |        |    |                                                                               |
| 12. What is your mother tongue? (State of origin)                                                                                                                         | <table border="0"> <tr> <td>Assamese</td><td>1</td><td>Malayalam</td><td>10</td></tr> <tr> <td>Balochi</td><td>2</td><td>Marathi</td><td>11</td></tr> <tr> <td>Bengali</td><td>3</td><td>Punjabi</td><td>14</td></tr> <tr> <td>Gujarati</td><td>4</td><td>Sindhi</td><td>15</td></tr> <tr> <td>Hindi</td><td>5</td><td>Telugu</td><td>16</td></tr> <tr> <td>Kannada</td><td>7</td><td>Tamil</td><td>17</td></tr> <tr> <td>Kashmiri</td><td>8</td><td>Urdu</td><td>18</td></tr> <tr> <td>Maithili</td><td>9</td><td>Others</td><td>19</td></tr> </table> | Assamese                                                | 1  | Malayalam | 10 | Balochi | 2 | Marathi | 11 | Bengali | 3 | Punjabi | 14 | Gujarati | 4 | Sindhi | 15 | Hindi | 5 | Telugu | 16 | Kannada | 7 | Tamil | 17 | Kashmiri | 8 | Urdu | 18 | Maithili | 9 | Others | 19 | <input type="checkbox"/> <input type="checkbox"/><br>Others, specify<br><hr/> |
| Assamese                                                                                                                                                                  | 1                                                                                                                                                                                                                                                                                                                                                                                                                                                                                                                                                       | Malayalam                                               | 10 |           |    |         |   |         |    |         |   |         |    |          |   |        |    |       |   |        |    |         |   |       |    |          |   |      |    |          |   |        |    |                                                                               |
| Balochi                                                                                                                                                                   | 2                                                                                                                                                                                                                                                                                                                                                                                                                                                                                                                                                       | Marathi                                                 | 11 |           |    |         |   |         |    |         |   |         |    |          |   |        |    |       |   |        |    |         |   |       |    |          |   |      |    |          |   |        |    |                                                                               |
| Bengali                                                                                                                                                                   | 3                                                                                                                                                                                                                                                                                                                                                                                                                                                                                                                                                       | Punjabi                                                 | 14 |           |    |         |   |         |    |         |   |         |    |          |   |        |    |       |   |        |    |         |   |       |    |          |   |      |    |          |   |        |    |                                                                               |
| Gujarati                                                                                                                                                                  | 4                                                                                                                                                                                                                                                                                                                                                                                                                                                                                                                                                       | Sindhi                                                  | 15 |           |    |         |   |         |    |         |   |         |    |          |   |        |    |       |   |        |    |         |   |       |    |          |   |      |    |          |   |        |    |                                                                               |
| Hindi                                                                                                                                                                     | 5                                                                                                                                                                                                                                                                                                                                                                                                                                                                                                                                                       | Telugu                                                  | 16 |           |    |         |   |         |    |         |   |         |    |          |   |        |    |       |   |        |    |         |   |       |    |          |   |      |    |          |   |        |    |                                                                               |
| Kannada                                                                                                                                                                   | 7                                                                                                                                                                                                                                                                                                                                                                                                                                                                                                                                                       | Tamil                                                   | 17 |           |    |         |   |         |    |         |   |         |    |          |   |        |    |       |   |        |    |         |   |       |    |          |   |      |    |          |   |        |    |                                                                               |
| Kashmiri                                                                                                                                                                  | 8                                                                                                                                                                                                                                                                                                                                                                                                                                                                                                                                                       | Urdu                                                    | 18 |           |    |         |   |         |    |         |   |         |    |          |   |        |    |       |   |        |    |         |   |       |    |          |   |      |    |          |   |        |    |                                                                               |
| Maithili                                                                                                                                                                  | 9                                                                                                                                                                                                                                                                                                                                                                                                                                                                                                                                                       | Others                                                  | 19 |           |    |         |   |         |    |         |   |         |    |          |   |        |    |       |   |        |    |         |   |       |    |          |   |      |    |          |   |        |    |                                                                               |
| 13. What religion do you follow? (Optional)                                                                                                                               | Hindu 1<br>Muslim 2<br>Sikh 3<br>Christian 4<br>Jain 5<br>Buddhism 6<br>No religion 7<br>Others (specify) 8<br>No response 9                                                                                                                                                                                                                                                                                                                                                                                                                            | <input type="checkbox"/><br>Others, specify<br><hr/>    |    |           |    |         |   |         |    |         |   |         |    |          |   |        |    |       |   |        |    |         |   |       |    |          |   |      |    |          |   |        |    |                                                                               |
| 14. Do you belong to a particular caste or tribe? (Optional)                                                                                                              | Yes 1<br>No 2<br>Don't know 3<br>Don't want to answer 4<br>Not applicable 5                                                                                                                                                                                                                                                                                                                                                                                                                                                                             | <input type="checkbox"/>                                |    |           |    |         |   |         |    |         |   |         |    |          |   |        |    |       |   |        |    |         |   |       |    |          |   |      |    |          |   |        |    |                                                                               |
| 14.a. If "Yes"<br>What is your caste or tribe? (Optional)                                                                                                                 | Schedule caste 1<br>Schedule tribe 2<br>Other backward caste 3<br>Most backward 4<br>Others 5<br>Don't want to answer 6                                                                                                                                                                                                                                                                                                                                                                                                                                 | <input type="checkbox"/><br>Others (specify)<br><hr/>   |    |           |    |         |   |         |    |         |   |         |    |          |   |        |    |       |   |        |    |         |   |       |    |          |   |      |    |          |   |        |    |                                                                               |
| 15. Number of years of formal education*<br>* The total number of years the participant spent in any educational institution (schools, colleges, religious schools, etc.) |                                                                                                                                                                                                                                                                                                                                                                                                                                                                                                                                                         | <input type="checkbox"/> <input type="checkbox"/> years |    |           |    |         |   |         |    |         |   |         |    |          |   |        |    |       |   |        |    |         |   |       |    |          |   |      |    |          |   |        |    |                                                                               |

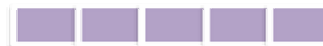

|                                                                                                                                                                                                                                                                                                                                |                                                                           |   |                                                                               |
|--------------------------------------------------------------------------------------------------------------------------------------------------------------------------------------------------------------------------------------------------------------------------------------------------------------------------------|---------------------------------------------------------------------------|---|-------------------------------------------------------------------------------|
| 16. Educational status (highest attained degree)<br><br><i>* A person who can both read and write with understanding in any language without any formal education or passed any minimum educational standard.</i><br><br><i>** A person, who can neither read nor write or can only read but cannot write in any language.</i> | Professional degree/post graduate                                         | 1 | <input type="checkbox"/><br><br>Others, specify<br><hr/> <hr/>                |
|                                                                                                                                                                                                                                                                                                                                | Graduate (B.A/B.Sc/B.Com/Diploma)                                         | 2 |                                                                               |
|                                                                                                                                                                                                                                                                                                                                | Secondary School / Intermediary (ITI course, class XII/X or Intermediate) | 3 |                                                                               |
|                                                                                                                                                                                                                                                                                                                                | High school (class V to IX)                                               | 4 |                                                                               |
|                                                                                                                                                                                                                                                                                                                                | Primary School (upto Class IV)                                            | 5 |                                                                               |
|                                                                                                                                                                                                                                                                                                                                | *Literate, no formal education                                            | 6 |                                                                               |
|                                                                                                                                                                                                                                                                                                                                | **Illiterate                                                              | 7 |                                                                               |
|                                                                                                                                                                                                                                                                                                                                | Others                                                                    | 8 |                                                                               |
| 17. Your employment status?                                                                                                                                                                                                                                                                                                    | Employed                                                                  | 1 | <input type="checkbox"/><br><br><b>"1" go to 17.a<br/>Otherwise go to Q18</b> |
|                                                                                                                                                                                                                                                                                                                                | Student                                                                   | 2 |                                                                               |
|                                                                                                                                                                                                                                                                                                                                | Housewife                                                                 | 3 |                                                                               |
|                                                                                                                                                                                                                                                                                                                                | Retired                                                                   | 4 |                                                                               |
|                                                                                                                                                                                                                                                                                                                                | Un-employed                                                               | 5 |                                                                               |
| 17.a. If <b>"Employed"</b> , what is your current occupation?<br><b>[Use nearest applicable employment codes given below]</b>                                                                                                                                                                                                  |                                                                           |   | <input type="checkbox"/>                                                      |
| 18. Have you been involved in any other occupation during past ten years?                                                                                                                                                                                                                                                      | Yes                                                                       | 1 | <input type="checkbox"/><br><br><b>"2" go to Q. 19</b>                        |
|                                                                                                                                                                                                                                                                                                                                | No                                                                        | 2 |                                                                               |
| 18.a. If <b>'YES'</b> , name the occupation?<br><b>[Use nearest applicable employment codes given below]</b>                                                                                                                                                                                                                   |                                                                           |   | <input type="checkbox"/>                                                      |
| <b>Coding list for employment (for Q.17.a and Q.18.a)- refer to annexure for definition of skilled, semi-skilled, un-skilled</b>                                                                                                                                                                                               |                                                                           |   |                                                                               |
| Professional, big business, landlord, university teacher, class 1 IAS/services officer, lawyer                                                                                                                                                                                                                                 |                                                                           | 1 |                                                                               |
| Trained, clerical, medium business owner, middle level farmer, teacher, maintenance (in charge), personnel manager                                                                                                                                                                                                             |                                                                           | 2 |                                                                               |
| Skilled manual labourer, small business owner, small farmer                                                                                                                                                                                                                                                                    |                                                                           | 3 |                                                                               |
| Semi-skilled manual labourer, marginal landowner, rickshaw driver, army jawan, carpenter, fitter                                                                                                                                                                                                                               |                                                                           | 4 |                                                                               |
| Unskilled manual labourer, landless labourer                                                                                                                                                                                                                                                                                   |                                                                           | 5 |                                                                               |
| 19. What is your total household income per month?<br><br><b>Please include income from all members who contribute to the household</b>                                                                                                                                                                                        | <3000                                                                     | 1 | <input type="checkbox"/>                                                      |
|                                                                                                                                                                                                                                                                                                                                | 3000-10,000                                                               | 2 |                                                                               |
|                                                                                                                                                                                                                                                                                                                                | 10,001-20,000                                                             | 3 |                                                                               |
|                                                                                                                                                                                                                                                                                                                                | 20,001-30,000                                                             | 4 |                                                                               |
|                                                                                                                                                                                                                                                                                                                                | 30,001-40,000                                                             | 5 |                                                                               |
|                                                                                                                                                                                                                                                                                                                                | 40,001-50,000                                                             | 6 |                                                                               |
|                                                                                                                                                                                                                                                                                                                                | >50,000                                                                   | 7 |                                                                               |
|                                                                                                                                                                                                                                                                                                                                | Refuse                                                                    | 8 |                                                                               |
|                                                                                                                                                                                                                                                                                                                                | Don't know                                                                | 9 |                                                                               |
| 20. Do you have a separate room for cooking (Kitchen)?                                                                                                                                                                                                                                                                         | Yes                                                                       | 1 | <input type="checkbox"/>                                                      |
|                                                                                                                                                                                                                                                                                                                                | No                                                                        | 2 |                                                                               |



|                                                                                                                                                                            |                                                                                                                                                                                                        |                                                                                                                                                                                                                                      |
|----------------------------------------------------------------------------------------------------------------------------------------------------------------------------|--------------------------------------------------------------------------------------------------------------------------------------------------------------------------------------------------------|--------------------------------------------------------------------------------------------------------------------------------------------------------------------------------------------------------------------------------------|
| 21. What is the fuel used for cooking?<br><b>If more than one source is used then note the source that is most commonly used</b>                                           | Coal/charcoal/kerosene 1<br>Electricity/gas (LPG)/solar/CNG (IGL) 2<br>Wood/dung 3<br>Others 4                                                                                                         | <br>Others (specify) _____                                                                                                                        |
| 22. What is the source of drinking water used at home?<br><b>If more than one source is used then note the source that is most commonly used</b>                           | Public source 1<br>Private source (Shared) 2<br>Private source (Own) 3<br>Bottled water 4<br>Purified tap water 5<br>Others 6                                                                          | <br>Others (specify) _____                                                                                                                        |
| 23. What is the toilet facility you use?                                                                                                                                   | Public toilet 1<br>Shared toilet 2<br>Own flush toilet 3<br>Others 4                                                                                                                                   | <br>Others (specify) _____                                                                                                                        |
| 24. Which of the following do you own?<br><br><b>[Yes=1; No=2]</b>                                                                                                         | a. Television<br>b. Refrigerator<br>c. Washing machine<br>d. Microwave / OTG<br>e. Mixer-grinder<br>f. Mobile phone<br>g. DVD player<br>h. Computer<br>i. Car<br>j. Motor Cycle /Scooter<br>k. Bicycle |                                                                                                                                                  |
| 25. Are you likely to move from your current residence within a year or two?                                                                                               | Yes 1<br>No 2<br>Don't know 3                                                                                                                                                                          |                                                                                                                                                 |
| 26. In case you move from current residence, whom can we contact to obtain your new contact address or telephone numbers?<br><b>Take details of two different contacts</b> | Neighbour 1<br>Relative 2<br>Friend 3<br>Employer 4<br>No one to contact 5<br>Others 6<br>Specify _____                                                                                                | <br><b>1<sup>st</sup></b><br><br><br><b>2<sup>nd</sup></b> |
| 27. Name of the 1 <sup>st</sup> contact person<br><br>First Name:<br>Middle name:<br>Last Name:                                                                            |                                                                                                                                                                                                        |                                                                                                                                                                                                                                      |



|                                                                                                                 |                                                                                                     |                                                                                                         |
|-----------------------------------------------------------------------------------------------------------------|-----------------------------------------------------------------------------------------------------|---------------------------------------------------------------------------------------------------------|
| 28. Address of the 1 <sup>st</sup> contact person                                                               |                                                                                                     |                                                                                                         |
| 29. Phone number (home, office, mobile) of 1 <sup>st</sup> contact person                                       | Home _____ (area code) _____ (number)                                                               |                                                                                                         |
|                                                                                                                 | Office _____ (area code) _____ (number)                                                             |                                                                                                         |
|                                                                                                                 | Mobile _____ (number)                                                                               |                                                                                                         |
| 30. Name of the 2 <sup>nd</sup> contact person<br>First Name:<br>Middle Name:<br>Last Name:                     |                                                                                                     |                                                                                                         |
| 31. Address of the 2 <sup>nd</sup> contact person                                                               |                                                                                                     |                                                                                                         |
| 32. Phone number (home, office, mobile) of 2 <sup>nd</sup> contact person                                       | Home _____ (area code) _____ (number)                                                               |                                                                                                         |
|                                                                                                                 | Office _____ (area code) _____ (number)                                                             |                                                                                                         |
|                                                                                                                 | Mobile _____ (number)                                                                               |                                                                                                         |
| <b>SECTION – 2: TOBACCO AND ALCOHOL CONSUMPTION, DIETARY HABITS, PHYSICAL ACTIVITY AND SLEEP</b>                |                                                                                                     |                                                                                                         |
| <b>PART – A: TOBACCO USE</b>                                                                                    |                                                                                                     |                                                                                                         |
| 1. Have you ever used tobacco in any form (smoking, chewing, snuff, etc)?                                       | Yes 1<br>No 2                                                                                       | <br>"2" go to Q. 8 |
| 2. In what forms have you consumed tobacco?<br>[Yes=1; No=2]                                                    | a. In a smoking form<br>b. In a chewed form<br>c. In any other form (snuff, toothpaste etc)         |                    |
| 3. Do you currently* consume tobacco?<br>* within past 6 months                                                 | Yes 1<br>No 2                                                                                       | <br>"2" go to Q. 5 |
| 4. If Yes, how often?<br>[Regularly (≥ once a week)= 1; Occasionally (<once a week)= 2; No=3; Not applicable=9] | Smoking form<br> | Chewed form<br>    |
|                                                                                                                 |                                                                                                     | Any other form<br> |

## 5. Quantity and duration of use (for both current and past users)

| Type of tobacco use / used   | Brand name | Duration of use |        | Usage per month<br>*Number smoked<br>**Number of times<br>***Approximate amount in gms | If you have stopped using any of the following products, time in months/years since you have stopped |        |
|------------------------------|------------|-----------------|--------|----------------------------------------------------------------------------------------|------------------------------------------------------------------------------------------------------|--------|
|                              |            | Years           | Months |                                                                                        | Years                                                                                                | Months |
| 1. Cigarette*                |            |                 |        |                                                                                        |                                                                                                      |        |
| 2. Beedi*                    |            |                 |        |                                                                                        |                                                                                                      |        |
| 3. Cigar*                    |            |                 |        |                                                                                        |                                                                                                      |        |
| 4. Hukka/Chelum/Pipe **      |            |                 |        |                                                                                        |                                                                                                      |        |
| 5. Tobacco chewing***        |            |                 |        |                                                                                        |                                                                                                      |        |
| 6. Pan with Zarda***         |            |                 |        |                                                                                        |                                                                                                      |        |
| 7. Pan masala with zarda***  |            |                 |        |                                                                                        |                                                                                                      |        |
| 8. Snuff**                   |            |                 |        |                                                                                        |                                                                                                      |        |
| 9. Gutkha***                 |            |                 |        |                                                                                        |                                                                                                      |        |
| 10. Others:<br>Specify _____ |            |                 |        |                                                                                        |                                                                                                      |        |

6. At what age did you first start smoking regularly?

**[Not applicable – write '99' in the box]**
  years

7. At what age did you first start consuming smokeless tobacco product regularly?

**[Not applicable – write '99' in the box]**
  years

8. Are you exposed to tobacco smoke from others regularly\*? (e.g. at home, at workplace regularly, while travelling, any other place)

 Yes 1  
 No 2

\* At least once a day in a week

  
**"2" go to PART B**
9. **If Yes:**

How many days a week\*?

How much time during a day\*?

  :  

HR MIN

(Please provide approximate time)

**PART – B: ALCOHOL USE**

1. Have you ever used alcohol?

 Yes 1  
 No 2

  
**"2" go to PART C**

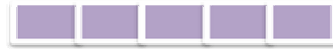

|                                                                                                      |                                                              |   |                             |
|------------------------------------------------------------------------------------------------------|--------------------------------------------------------------|---|-----------------------------|
| 2. How often do you use alcoholic beverages?<br><br><b>*Occasionally means less than once a week</b> | Currently using alcohol regularly                            | 1 | <br><b>"5" go to PART C</b> |
|                                                                                                      | Currently using alcohol occasionally*                        | 2 |                             |
|                                                                                                      | Used alcohol in the past<br>(stopped more than 6 months ago) | 3 |                             |
|                                                                                                      | Recently stopped alcohol (less<br>than 6 months ago)         | 4 |                             |
|                                                                                                      | Never used alcohol                                           | 5 |                             |

3. History of alcohol use for both present and past users

| Type of alcohol used                           | Duration of use |        | Frequency of use per week | Quantity**<br>in ml/peg per occasion | If stopped, since how long |        |
|------------------------------------------------|-----------------|--------|---------------------------|--------------------------------------|----------------------------|--------|
|                                                | Years           | Months |                           |                                      | Years                      | Months |
| a) Local spirits eg. Desi, arrack, toddy etc   |                 |        |                           |                                      |                            |        |
| b) Spirits eg. whisky, rum, brandy, gin, vodka |                 |        |                           |                                      |                            |        |
| c) Beer                                        |                 |        |                           |                                      |                            |        |
| d) Wine                                        |                 |        |                           |                                      |                            |        |

\*\* Conversion

1 small peg = 30 ml; 1 large peg = 60 ml; 1 extra large peg = 90 ml

1 glass of beer = approx. 325 ml

1 glass of wine = 100 ml

**Please use local measures in calculating the total consumption (in ml per occasion)**

### PART – C: PHYSICAL ACTIVITY (International Physical Activity Questionnaire – short)

We are interested in finding out about the kinds of physical activities that people do as part of their everyday lives. I am going to ask you about the time you spent being physically active in the usual 7 days of a week. Please answer each question even if you do not consider yourself to be an active person. Think about the activities you do at work, as part of your house and yard work, to get from place to place, and in your spare time for recreation, exercise or sport.

**Now, think about all the *vigorous* activities that you did in a usual 7 days. Vigorous activities make you breathe much harder than normal and may include heavy lifting, digging, aerobics, or fast bicycling. Think only about those physical activities that you do for at least 10 minutes at a time.**

|                                                                                                                                                                                             |                                    |              |
|---------------------------------------------------------------------------------------------------------------------------------------------------------------------------------------------|------------------------------------|--------------|
| 1. During a usual 7 days, on how many days did you do <b>vigorous</b> physical activities?                                                                                                  | Days per week = 1                  |              |
|                                                                                                                                                                                             | Refused (go to Q.3) = 2            |              |
| Don't Know/Not Sure (go to 3) = 3                                                                                                                                                           |                                    |              |
| Don't do any activity (go to 3) = 4                                                                                                                                                         |                                    |              |
| 2. How much time did you usually spend doing <b>vigorous</b> physical activities on one of those days? Think only about those physical activities you do for at least 10 minutes at a time. | Hours/ Minutes per day = 1         | <br>HR : MIN |
|                                                                                                                                                                                             | Refused (go to Q.2a) = 2           |              |
|                                                                                                                                                                                             | Don't Know/Not Sure (go to 2a) = 3 |              |

|                                                                                                                                                                                                                                                                                                                                                                                                                                                                                                                           |                                                                                                                                                                     |                                                                                       |
|---------------------------------------------------------------------------------------------------------------------------------------------------------------------------------------------------------------------------------------------------------------------------------------------------------------------------------------------------------------------------------------------------------------------------------------------------------------------------------------------------------------------------|---------------------------------------------------------------------------------------------------------------------------------------------------------------------|---------------------------------------------------------------------------------------|
| <p>2a. <b>Interviewer probe:</b> If the respondent can't answer because the pattern of time spent varies widely from day to day, say, "I am interested in the average time for one of the days on which you do vigorous activity. Can you tell me how much time in total would you spend <b>over a usual 7 days</b> doing vigorous physical activities?"</p>                                                                                                                                                              | <p>Hours/ Minutes per day = 1<br/>         Refused = 2<br/>         Don't Know/Not Sure = 3</p>                                                                     |    |
| <p><b>Now think about activities which take moderate physical effort that you did in a usual 7 days. Moderate physical activities make you breathe somewhat harder than normal. Do not include walking. Again, think about only those physical activities that you did for at least 10 minutes at a time.</b></p>                                                                                                                                                                                                         |                                                                                                                                                                     |                                                                                       |
| <p>3. During a <b>usual 7 days</b>, on how many days did you do <b>moderate</b> physical activities for at least 10 minutes?<br/>         Examples: carrying loads, bicycling at a regular pace, tennis, badminton, cricket, hand washing clothes, sweeping the floor, gardening, taking care of children less than three years old, washing cars, motorcycles, or scooters, walking home while carrying vegetables and groceries from market, climbing stairs (three floors or more), and grinding chutney on stone.</p> | <p>Days per week =1<br/>         Refused (go to Q.5) = 2<br/>         Don't Know/Not Sure (go to Q.5) = 3<br/>         Don't do any activity (go to Q.5) = 4</p>    |    |
| <p>4. How much time did you usually spend doing <b>moderate</b> physical activities on one of those days? Think only about those physical activities that you do for at least 10 minutes at a time.</p>                                                                                                                                                                                                                                                                                                                   | <p>Hours/ Minutes per day=1<br/>         Refused (Go To Q.4a) = 2<br/>         Don't Know/Not Sure (Go To Q.4a)=3</p>                                               |    |
| <p>4a. <b>Interviewer probe:</b> If the respondent can't answer because the pattern of time spent varies widely from day to day, or includes time spent in multiple jobs, say, "I am interested in the average time for one of the days on which you do moderate activity. Can you tell me what is the total amount of time you spent over a <b>usual 7 days</b> doing moderate physical activities?"</p>                                                                                                                 | <p>Hours/ Minutes per day=1<br/>         Refused = 2<br/>         Don't Know/Not Sure = 3</p>                                                                       |   |
| <p><b>Now think about the time you spent walking in a usual 7 days. This includes at work and at home, walking to travel from place to place. Also include any walking that you do solely for recreation, sport, exercise, or leisure, for example, walking to the bus stop, to workplace, to the market for at least 10 minutes.</b></p>                                                                                                                                                                                 |                                                                                                                                                                     |                                                                                       |
| <p>5. During a <b>usual 7 days</b>, on how many days did you <b>walk</b> for at least 10 minutes at a time? Think only about the walking that you do for at least 10 minutes at a time.</p>                                                                                                                                                                                                                                                                                                                               | <p>Days per week = 1<br/>         Refused (go to Q. 7) = 2<br/>         Don't Know/Not Sure (go to Q. 7) =3<br/>         Don't do any activity (go to Q. 7) = 4</p> |  |
| <p>6. How much time did you usually spend <b>walking</b> on one of those days?</p>                                                                                                                                                                                                                                                                                                                                                                                                                                        | <p>Hours/ Minutes per day (go to Q. 7) =1<br/>         Refused (go to Q.6a) = 2<br/>         Don't Know/Not Sure (go to Q6a) =3</p>                                 |  |
| <p>6a. <b>Interviewer probe:</b> If the respondent can't answer because the pattern of time spent varies widely from day to day say, "I am interested in the average time for one of the days on which you walk. Can you tell me what is the total amount of time you spent walking over a <b>usual 7 days</b>?"</p>                                                                                                                                                                                                      | <p>Hours/ Minutes per week =1<br/>         Refused = 2<br/>         Don't Know/Not Sure =3</p>                                                                      |  |
| <p><b>Now think about the time you spent sitting on week days during a usual 7 days. Include time spent at work, at home, while doing course work, and during leisure time. This may include time spent sitting at a desk, visiting friends, reading or sitting or lying down to watch television, cutting vegetables, sewing and knitting, or time spent in teaching children, performing religious prayers, chatting with friends, talking on the phone, or working in front of the computer.</b></p>                   |                                                                                                                                                                     |                                                                                       |



|                                                                                                                                                                                                                                                                                                  |                                                                                                               |                                                                                     |
|--------------------------------------------------------------------------------------------------------------------------------------------------------------------------------------------------------------------------------------------------------------------------------------------------|---------------------------------------------------------------------------------------------------------------|-------------------------------------------------------------------------------------|
| 7. During a usual 7 days, how much time did you usually spend <b>sitting</b> on a <b>weekday</b> ? Include time spent lying down (awake) as well as sitting. (*Exclude sleeping at night)                                                                                                        | Hours/ Minutes per week day (go to Q. 8)=1<br>Refused (go to Q. 7a) = 2<br>Don't Know/Not Sure(go to Q7a) = 3 | 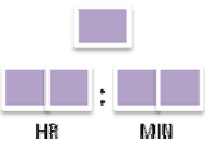 |
| 7a. <b>Interviewer probe:</b> If the respondent can't answer because the pattern of time spent varies widely from day to day, say "I am interested in the average time per day spent sitting. Can you tell me what is the total amount of time you spent <i>sitting</i> last <b>Wednesday</b> ?" | Hours/ Minutes on Wednesday = 1<br>Refused =2<br>Don't Know/Not Sure =3                                       |  |

8. Additional comments

**PART – D: SLEEP (Sleep Heart Health Study; NHLBI)**

|                                                                                                                                                                                                                                 |                                                                                                                            |                                                                                                                  |
|---------------------------------------------------------------------------------------------------------------------------------------------------------------------------------------------------------------------------------|----------------------------------------------------------------------------------------------------------------------------|------------------------------------------------------------------------------------------------------------------|
| 1. How many hours of sleep do you usually get at night (or your main sleep period)?<br><b>Average hours of sleep per night</b>                                                                                                  | On weekdays / workdays<br><br>No. of hrs | On weekends<br><br>No. of hrs |
| 2. During a usual week, how many times do you nap for 5 minutes or more? (Write "00" if the participant does not take any naps)                                                                                                 | <br>No. of times                        |                                                                                                                  |
| 3. Please indicate how often you experience each of the following ( <b>refer to codes below</b> )<br><b>[Never=1; Rarely (1/month or less)=2; Sometimes (2-4/month)=3; Often (5-15/month)=4; Almost always (16-30/month)=5]</b> |                                                                                                                            |                                                                                                                  |
| A. Have trouble falling asleep                                                                                                                                                                                                  | <input type="text"/>                                                                                                       |                                                                                                                  |
| B. Wake up during the night and have difficulty getting back to sleep                                                                                                                                                           | <input type="text"/>                                                                                                       |                                                                                                                  |
| C. Wake up too early in the morning and be unable to get back to sleep                                                                                                                                                          | <input type="text"/>                                                                                                       |                                                                                                                  |
| D. Feel unrested during the day, no matter how many hours of sleep you had                                                                                                                                                      | <input type="text"/>                                                                                                       |                                                                                                                  |
| E. Do not get enough sleep                                                                                                                                                                                                      | <input type="text"/>                                                                                                       |                                                                                                                  |
| F. Take sleeping pills or other medication to help you sleep                                                                                                                                                                    | <input type="text"/>                                                                                                       |                                                                                                                  |

**Questions 4 to 10 are about snoring and breathing during sleep. To answer these questions please consider what other have told you and what you know about yourself**

|                                                        |                                                                                                                                                                                       |                                                                                                                    |
|--------------------------------------------------------|---------------------------------------------------------------------------------------------------------------------------------------------------------------------------------------|--------------------------------------------------------------------------------------------------------------------|
| 4. Have you ever snored (now or any time in the past)? | Yes 1<br>No 2<br>Don't know 8                                                                                                                                                         | <br><b>"2", "8" go to Q.7</b> |
| 5. How often do you snore now?                         | Do not snore anymore 0<br>Rarely (<1 night/week) 1<br>Sometimes (1-2 nights/week) 2<br>Frequently (3-5 nights/week) 3<br>Always or almost always(6-7nights/week) 4<br>Don't know 8    | <br><b>"0" go to Q.7</b>      |
| 6. How loud is your snoring?                           | Only slightly louder than heavy breathing 1<br>About as loud as mumbling or talking 2<br>Louder than talking 3<br>Extremely loud-can be heard through a closed door 4<br>Don't know 8 |                               |



|                                                                                                                                                                                                                                                                                                                                                     |                                                                                                                                                          |                                                                                                                                            |
|-----------------------------------------------------------------------------------------------------------------------------------------------------------------------------------------------------------------------------------------------------------------------------------------------------------------------------------------------------|----------------------------------------------------------------------------------------------------------------------------------------------------------|--------------------------------------------------------------------------------------------------------------------------------------------|
| 7. Based on what you have noticed or household members have told you, are there times when you stop breathing during your sleep?                                                                                                                                                                                                                    | Yes 1<br>No 2<br>Don't know 8                                                                                                                            | <br><b>"2", "8" go to Q.9</b>                           |
| 8. How often do you have times when you stop breathing during your sleep?                                                                                                                                                                                                                                                                           | Rarely (<1 night/week) 1<br>Sometimes (1-2 nights/week) 2<br>Frequently (3-5 nights/week) 3<br>Always or almost always(6-7nights/week) 4<br>Don't know 8 |                                                         |
| 9. Have you ever been told by a doctor that you had sleep apnoea (a condition in which breathing stops briefly during sleep)?                                                                                                                                                                                                                       | Yes 1<br>No 2<br>Don't know 8                                                                                                                            | <br><b>"1" go to Q.11</b><br><b>"2", "8" go to Q.10</b> |
| 10. Have you ever been told by a doctor that you had some other sleep disorder?                                                                                                                                                                                                                                                                     | Yes 1<br>No 2<br>Don't know 8                                                                                                                            | <br><b>"2", "8" go to Q.11</b>                          |
| 10.A. If response is "yes" to the above question, please specify the disorder<br><hr/> <hr/>                                                                                                                                                                                                                                                        |                                                                                                                                                          |                                                                                                                                            |
| 11. Do you usually use oxygen therapy (oxygen delivered by a mask or nasal cannula) during your sleep?                                                                                                                                                                                                                                              | Yes 1<br>No 2                                                                                                                                            |                                                         |
| 12. During the past year how often have one or more members of your household been in or near the room where you have slept?                                                                                                                                                                                                                        | Never 1<br>Sometimes 2<br>Usually 3                                                                                                                      |                                                       |
| 13. <b>What is the chance that you would doze off or fall asleep (not just "feel tired") in each of the following situations? (refer to the codes below)</b><br><b>[No chance=1; Slight chance=2; Moderate chance=3; High chance=4]</b><br><i>If you are never or rarely in the situation, please give your <b>best guess</b> for the situation</i> |                                                                                                                                                          |                                                                                                                                            |
| A. Sitting and reading                                                                                                                                                                                                                                                                                                                              |                                                                                                                                                          |                                                                                                                                            |
| B. Watching TV                                                                                                                                                                                                                                                                                                                                      |                                                                                                                                                          |                                                                                                                                            |
| C. Sitting inactive in a public place (such as a theatre or a meeting)                                                                                                                                                                                                                                                                              |                                                                                                                                                          |                                                                                                                                            |
| D. Riding as a passenger in a car for an hour without a break                                                                                                                                                                                                                                                                                       |                                                                                                                                                          |                                                                                                                                            |
| E. Lying down to rest in the afternoon when circumstances permit                                                                                                                                                                                                                                                                                    |                                                                                                                                                          |                                                                                                                                            |
| F. Sitting and talking to someone                                                                                                                                                                                                                                                                                                                   |                                                                                                                                                          |                                                                                                                                            |
| G. Sitting quietly after a lunch                                                                                                                                                                                                                                                                                                                    |                                                                                                                                                          |                                                                                                                                            |
| H. In a car, while stopped for a few minutes in traffic                                                                                                                                                                                                                                                                                             |                                                                                                                                                          |                                                                                                                                            |
| I. At the dinner table                                                                                                                                                                                                                                                                                                                              |                                                                                                                                                          |                                                                                                                                            |
| J. While driving                                                                                                                                                                                                                                                                                                                                    |                                                                                                                                                          |                                                                                                                                            |

|                                                                    |                                      |   |                          |
|--------------------------------------------------------------------|--------------------------------------|---|--------------------------|
| 14. How often do you take aspirin or aspirin-containing medicines? | Never                                | 1 | <input type="checkbox"/> |
|                                                                    | Less often than once a week          | 2 |                          |
|                                                                    | Once or twice a week                 | 3 |                          |
|                                                                    | Every other day (one day out of two) | 4 |                          |
|                                                                    | Every day                            | 5 |                          |
|                                                                    | Don't know                           | 8 |                          |
| 15. Do you drive?                                                  | Yes                                  | 1 | <input type="checkbox"/> |
|                                                                    | No                                   | 2 |                          |

"2" go to Part E

16. If the response to the above question is "yes" please answer the following questions, else go to Part-E (Diet)

A. No. of years of driving

 

B. How often do you drive?

[Everyday=1; sometimes=2; rarely/never=3]

C. Since you began driving, how many accidents have you had while you were the driver?

 

D. How many accidents have you had in the last year while you were the driver?

 
**PART – E: DIET**

|                                 |     |   |                          |
|---------------------------------|-----|---|--------------------------|
| 1. Are you a vegetarian?        | Yes | 1 | <input type="checkbox"/> |
|                                 | No  | 2 |                          |
| 2. Do you take eggs?            | Yes | 1 | <input type="checkbox"/> |
|                                 | No  | 2 |                          |
| 3. Are you on any special diet? | Yes | 1 | <input type="checkbox"/> |
|                                 | No  | 2 |                          |

"2" go to Q.6

|                                                                                    |                           |                          |
|------------------------------------------------------------------------------------|---------------------------|--------------------------|
| 4. If <b>YES</b> , what diets are you currently following<br><br>[Yes = 1; No = 2] | Diabetic diet             | <input type="checkbox"/> |
|                                                                                    | Low fat diet              |                          |
|                                                                                    | High fibre diet           |                          |
|                                                                                    | Low salt diet             |                          |
|                                                                                    | Weight reducing diet      |                          |
|                                                                                    | Others (Specify)<br>_____ |                          |

5. Since how many years are you on this special diet? Yrs   Mnts   [Enter the the longest duration]

|                                            |                                      |   |                          |
|--------------------------------------------|--------------------------------------|---|--------------------------|
| 6. How frequently do you use reheated oil? | Every day                            | 1 | <input type="checkbox"/> |
|                                            | Every other day (one day out of two) | 2 |                          |
|                                            | Once or twice a week                 | 3 |                          |
|                                            | Less often than once a week          | 4 |                          |
|                                            | Never                                | 5 |                          |

5. In the past one year, how often have you consumed foods from the following food groups? [write the frequency of consumption in the appropriate column]

| Sl. No. | Food groups | Consumed never/less than once /month [√] | Consumed monthly | Consumed weekly | Consumed daily |
|---------|-------------|------------------------------------------|------------------|-----------------|----------------|
| 1       | Meats       |                                          |                  |                 |                |
| 2       | Poultry     |                                          |                  |                 |                |
| 3       | Organ meats |                                          |                  |                 |                |



|    |                                            |  |  |  |  |
|----|--------------------------------------------|--|--|--|--|
| 4  | <b>Fish</b>                                |  |  |  |  |
| 5  | <b>Shell fish and crustaceans</b>          |  |  |  |  |
| 6  | <b>Eggs</b>                                |  |  |  |  |
| 7  | <b>Milk and milk products</b>              |  |  |  |  |
| 8  | <b>Milk based desserts</b>                 |  |  |  |  |
| 9  | <b>Deep fried foods: western style</b>     |  |  |  |  |
| 10 | <b>Deep fried foods: desi style</b>        |  |  |  |  |
| 11 | <b>Western style desserts/sweet snacks</b> |  |  |  |  |
| 12 | <b>Mithai</b>                              |  |  |  |  |
| 13 | <b>cold beverages</b>                      |  |  |  |  |
| 14 | <b>Fruits (1)</b>                          |  |  |  |  |
| 15 | <b>Fruits (2)</b>                          |  |  |  |  |
| 16 | <b>Fruit juices</b>                        |  |  |  |  |
| 17 | <b>Nuts/seeds</b>                          |  |  |  |  |
| 18 | <b>Leafy greens</b>                        |  |  |  |  |
| 19 | <b>Other raw vegetables</b>                |  |  |  |  |
| 20 | <b>Legumes and pulses</b>                  |  |  |  |  |
| 21 | <b>Use of pickles, pickled foods</b>       |  |  |  |  |
| 22 | <b>Other cooked vegetables</b>             |  |  |  |  |
| 23 | <b>Refined cereals with less fibre</b>     |  |  |  |  |
| 24 | <b>Whole grain</b>                         |  |  |  |  |
| 25 | <b>Tea consumption</b>                     |  |  |  |  |
| 26 | <b>Coffee consumption</b>                  |  |  |  |  |

**Annex for food groups [showing items in each group]**

|                                                                                                                                                                       |
|-----------------------------------------------------------------------------------------------------------------------------------------------------------------------|
| <b>Meat</b> [lamb, mutton, goat, veal, rabbit, beef, pork; their curries]                                                                                             |
| <b>Poultry</b> [chicken, turkey, duck, pheasant, quail; their curries]                                                                                                |
| <b>Organ meats</b> [liver, kidney, brain, spleen, heart and sausages nihari, paya]                                                                                    |
| <b>Fish</b> [fresh-water and sea-water fish; preserved fish such as salted fish, canned fish, dried fish]                                                             |
| <b>Shell fish and crustaceans</b> [crab, squid, prawns, molluscs, caviar]                                                                                             |
| <b>Eggs</b> [Includes preserved eggs, duck eggs]                                                                                                                      |
| <b>Milk and milk products:</b> [milk, yogurt, cheese, curd, raita, lassi, milk based drinks]                                                                          |
| <b>Milk based desserts</b> [custard, khoya, firni, kheer, milk puddings, rasgullah/rasmalai, ice creams]all milk based desserts                                       |
| <b>Deep fried foods: western style</b> [french fries, potato chips, onion rings, chicken nuggets]                                                                     |
| <b>Deep fried foods: desi style</b> [samosas, papad, pakoras, sev, namak paray, egg rolls, poori, kachori]                                                            |
| <b>Western style desserts/sweet snacks</b> [cakes; pies; chocolate; candy; biscuits]                                                                                  |
| <b>Mithai</b> [burfi/ladoo; gulab jamun; halwa; shameia, mohalabeia]                                                                                                  |
| <b>Cold beverages</b> [carbonated beverages, sherbets, and other soft drinks]                                                                                         |
| <b>Fruits (1)</b> [strawberries, pine apples, jumbo berries (jamuns), apples]                                                                                         |
| <b>Fruits (2) all seasonal fruits except the ones above</b>                                                                                                           |
| <b>Fruit juices</b> [any type, homemade, purchased, fresh, frozen]                                                                                                    |
| <b>Nuts/seeds</b> [Includes peanuts, almonds, sunflower seeds, cashews, walnuts]                                                                                      |
| <b>Leafy greens</b> [all fresh leafy green vegetables: spinach, mustard or turnip greens; asparagus either raw or cooked]                                             |
| <b>Other raw vegetables</b> [any raw vegetables not included in the preceding categories]                                                                             |
| <b>Legumes and pulses</b> [includes all daals, chickpeas, lentils]                                                                                                    |
| <b>Use of pickles, pickled foods</b> [ achar, chutneys, pickled vegetables etc]                                                                                       |
| <b>Other cooked vegetables</b> [any cooked vegetables not included in the preceding categories]                                                                       |
| <b>Refined cereals with less fibre</b> [boiled rice, fried rice, biryani, pulao, idli, dosa, semolina,sago, pearl barley, pasta, sheermal, taftan, white bread slice] |
| <b>Whole grain (cereal dished with more fibre)</b> [Roti made with whole meal flour, brown rusk, whole wheat porridge, bread slice whole meal/brown]                  |
| <b>Tea consumption</b> [black tea, coffee with and without milk and sugar and any other tea]                                                                          |
| <b>Coffee consumption</b> [coffee with and without milk and/sugar]                                                                                                    |

**SECTION – 3: FEMALE REPRODUCTIVE HISTORY**

**THIS SECTION IS TO BE FILLED ONLY FOR THE FEMALE PARTICIPANTS, FOR MALE PARTICIPANTS SKIP THIS SECTION AND GO TO SECTION – 4.**

1. Number of pregnancies so far?

**Not Applicable = 99**

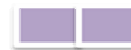

|                                                                            |                                                                                                       |                      |                                                                                                                                 |
|----------------------------------------------------------------------------|-------------------------------------------------------------------------------------------------------|----------------------|---------------------------------------------------------------------------------------------------------------------------------|
| 2. At what age did you start menstruating?                                 | Years <input type="text"/> <input type="text"/>                                                       |                      |                                                                                                                                 |
| 3. Are you having menstrual cycles?                                        | Yes 1<br>No 2                                                                                         | <input type="text"/> | "1" go to Q. 6                                                                                                                  |
| 4. If 'No' what is the reason?                                             | Pregnancy 1<br>Lactation 2<br>Natural menopause 3<br>Surgical menopause 4<br>Other reasons(specify) 5 | <input type="text"/> | <b>Others, specify</b> _____<br>_____                                                                                           |
| 5. If postmenopausal, since how long?                                      | Years <input type="text"/> <input type="text"/> Months <input type="text"/> <input type="text"/>      |                      |                                                                                                                                 |
| 6. Hormonal drugs or oral contraceptive pills?<br><b>[Yes = 1; No = 2]</b> | Ever used in the past                                                                                 | <input type="text"/> | If Yes, duration in years/month<br>Yrs <input type="text"/> <input type="text"/> Mnts <input type="text"/> <input type="text"/> |
|                                                                            | Currently using                                                                                       | <input type="text"/> | If Yes, duration in years/month<br>Yrs <input type="text"/> <input type="text"/> Mnts <input type="text"/> <input type="text"/> |

**SECTION – 4: QUALITY OF LIFE (EQ-5D)** © 1990 EuroQol Group. EQ-5D™ is a trade mark of the EuroQol Group.

By writing a code from the options in the box, please indicate which statements best describe your own state of health today.

|                                                                                           |                                                                                                                                                                        |                      |
|-------------------------------------------------------------------------------------------|------------------------------------------------------------------------------------------------------------------------------------------------------------------------|----------------------|
| 1. Mobility                                                                               | I have no problems in walking about=1<br>I have some problems in walking about=2<br>I am confined to bed=3                                                             | <input type="text"/> |
| 2. Self-Care                                                                              | I have no problems with self-care=1<br>I have some problems washing or dressing myself=2<br>I am unable to wash or dress myself=3                                      | <input type="text"/> |
| 3. Usual Activities<br><i>(e.g. work, study, housework, family or leisure activities)</i> | I have no problems with performing my usual activities=1<br>I have some problems with performing my usual activities=2<br>I am unable to perform my usual activities=3 | <input type="text"/> |
| 4. Pain/ Discomfort                                                                       | I have no pain or discomfort=1<br>I have moderate pain or discomfort=2<br>I have extreme pain or discomfort=3                                                          | <input type="text"/> |
| 5. Anxiety/ Depression                                                                    | I am not anxious or depressed=1<br>I am moderately anxious or depressed=2<br>I am extremely anxious or depressed=3                                                     | <input type="text"/> |



To help people say how good or bad their state of health is, we have drawn a scale (rather like a thermometer) on which the best state you can imagine is marked 100 and the worst state you can imagine is marked 0.

I would like you to indicate on this scale how good or bad your own health is today, in your opinion. Please do this by drawing a line from the box below to whichever point on the scale indicates how good or bad your state of health is today.

**Your own  
state of health  
today**

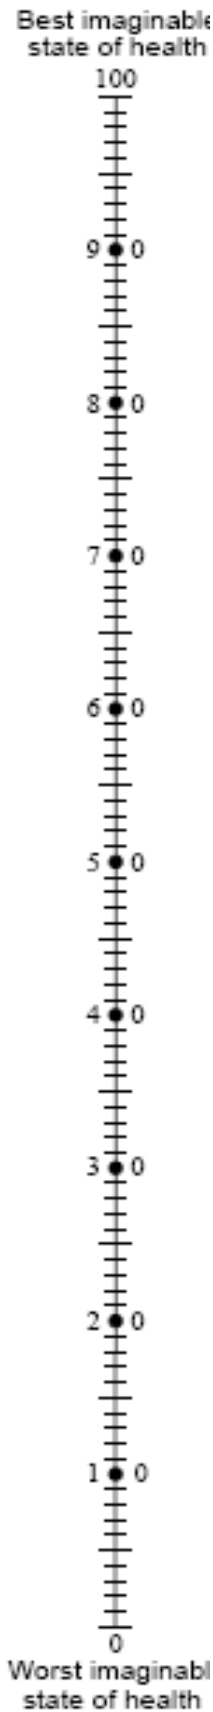

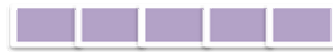
**SECTION – 5: MEDICAL HISTORY**
**PART-A: CARDIOMETABOLIC DISEASES AND THEIR RISK FACTORS**

1. Have you ever been told by a doctor that you have any of the following diseases?

**[Yes = 1; No = 2; Don't know=3]**

Hypertension (High blood pressure)  
 Diabetes (High Blood Sugar)  
 Hyperlipidemia (High Cholesterol)  
 Heart Disease  
 Stroke (Paralytic Attack)  
 Chronic Kidney Disease

  
  
  
  
  


*\*Exclude pregnancy induced Hypertension and High Blood Sugar*

*If the answer is 'YES' to any of the choices in Q. 1, then go to PART – B 'OTHERWISE' skip the entire section and go to PART-C.*

**PART - B: DISEASE SPECIFIC QUESTIONS**
**I. HYPERTENSION (High Blood Pressure)**

*Fill this section if the answer for high blood pressure is "YES" in PART - A, Q.1.*

a. Since how many years have you had high blood pressure?

Duration in years/month

Yrs   Mnts

b. What treatment are you taking for it currently?

**[Yes=1; No=2]**

**\*Traditional medicine / therapy include yoga, ayurveda, unani, homeopathy, Tibetan, naturopathy, meditation**

Prescribed dietary modifications  
 Prescribed physical exercise  
 Traditional medicine / therapy\*  
 Allopathic drugs (English / modern)  
 None

  
  
  
  


c. How regular are you in taking your medicines?

Taking Regularly 1  
 Forget to take occasionally 2  
 Take medicines only when I feel the blood pressure is high 3  
 Discontinued for more than a month at a time 4  
 Never taken any medication 5

**If "4" go Q.d otherwise go to Q.e.**

d. What is the reason for discontinuation?

Cannot afford 1  
 Cannot tolerate 2  
 I have recovered 3  
 No reason 4  
 Don't remember 5  
 Others (specify) 6

**Others, specify**

\_\_\_\_\_

e. Do you think your blood pressure is under good control?

Yes 1  
 No 2  
 Don't Know 3

|                                                                                                                            |                                                                                                          |                       |                          |
|----------------------------------------------------------------------------------------------------------------------------|----------------------------------------------------------------------------------------------------------|-----------------------|--------------------------|
| f. Does your doctor say that your blood pressure is under good control?                                                    | Yes<br>No<br>Don't Know                                                                                  | 1<br>2<br>3           | <input type="checkbox"/> |
| g. What was your last blood pressure recording (when your doctor checked you)? = 1<br>Don't know = 2<br>Can't remember = 3 | _____ (systolic) / _____ (diastolic) mmHg<br><input type="checkbox"/>                                    |                       |                          |
| h. When was the last time you consulted your doctor?                                                                       | Less than 1 month<br>More than 1 month<br>More than 3 months<br>Less than 6 months<br>More than 6 months | 1<br>2<br>3<br>4<br>5 | <input type="checkbox"/> |
| i. Do you have medical records or prescriptions related to high blood pressure?                                            | Yes<br>No<br>Don't Know                                                                                  | 1<br>2<br>3           | <input type="checkbox"/> |

j. If the answer is **YES**, ask the participant to show the medical records and note the diagnosis below

**k. Note the recorded blood pressure from the most recent medical record / prescription**

\_\_\_\_\_ (systolic) / \_\_\_\_\_ (diastolic) mmHg

## II. DIABETES

Fill this section if the answer for high blood sugar is "YES" in PART-A, Q.1

|                                                                                                                                                                                           |                                                                                                                                                                                          |                                           |                                                                                                                                          |
|-------------------------------------------------------------------------------------------------------------------------------------------------------------------------------------------|------------------------------------------------------------------------------------------------------------------------------------------------------------------------------------------|-------------------------------------------|------------------------------------------------------------------------------------------------------------------------------------------|
| a. For how long have you had high blood sugar / diabetes?                                                                                                                                 | Duration in years/month                                                                                                                                                                  |                                           |                                                                                                                                          |
|                                                                                                                                                                                           | Yrs                                                                                                                                                                                      | <input type="text"/> <input type="text"/> | Mnts <input type="text"/> <input type="text"/>                                                                                           |
| b. What treatment are you taking for it currently?<br>[Yes=1; No=2]<br><b>*Traditional medicine / therapy include yoga, ayurveda, unani, homeopathy, Tibetan, naturopathy, meditation</b> | Prescribed dietary modifications<br>Prescribed physical exercise<br>Traditional medicine / therapy*<br>Allopathic drugs (English / modern)<br>None                                       |                                           | <input type="checkbox"/><br><input type="checkbox"/><br><input type="checkbox"/><br><input type="checkbox"/><br><input type="checkbox"/> |
| c. How regular are you in taking your medicines?                                                                                                                                          | Taking Regularly<br>Forget to take occasionally<br>Take medicines only when I feel the blood sugar is high<br>Discontinued for more than a month at a time<br>Never taken any medication | 1<br>2<br>3<br>4<br>5                     | <input type="checkbox"/>                                                                                                                 |

**If "4" go Q.d otherwise go to Q.e.**





|                                                                                                                                                                                                                                                                                                         |                                                                                                                     |                                                                                                                        |
|---------------------------------------------------------------------------------------------------------------------------------------------------------------------------------------------------------------------------------------------------------------------------------------------------------|---------------------------------------------------------------------------------------------------------------------|------------------------------------------------------------------------------------------------------------------------|
| d. What is the reason for discontinuation?                                                                                                                                                                                                                                                              | Cannot afford 1<br>Cannot tolerate 2<br>I have recovered 3<br>No reason 4<br>Don't remember 5<br>Others (specify) 6 | <br><b>Others, specify</b><br>_____ |
| e. Do you think your diabetes/high blood sugar is under good control?                                                                                                                                                                                                                                   | Yes 1<br>No 2<br>Don't Know 3                                                                                       |                                     |
| f. Does your doctor say that your diabetes /high blood sugar is under good control?                                                                                                                                                                                                                     | Yes 1<br>No 2<br>Don't Know 3                                                                                       |                                     |
| g. What was your fasting blood sugar and after meal blood sugar when you got it checked last time?                                                                                                                                                                                                      | Fasting _____mg/dl<br>After meal _____mg/dl                                                                         |                                                                                                                        |
| h. When was the last time you consulted your doctor?                                                                                                                                                                                                                                                    | Less than 1 month 1<br>More than 1 month 2<br>More than 3 months 3<br>Less than 6 months 4<br>More than 6 months 5  |                                     |
| i. Do you have medical records or prescriptions related to diabetes/high blood sugar?                                                                                                                                                                                                                   | Yes 1<br>No 2<br>Don't Know 3                                                                                       |                                   |
| j. <i>If the answer is <b>YES</b>, ask the participant to show the medical records and note the diagnosis below</i>                                                                                                                                                                                     |                                                                                                                     |                                                                                                                        |
| k. <b>Note the recorded fasting blood sugar and after meal blood sugar level from the most recent medical record / prescription</b><br><br><p style="text-align: center;"> <b>Fasting</b> _____ <b>mg/dl</b><br/> <b>After meal</b> _____ <b>mg/dl</b> </p> <p><b><u>Also complete PART – D</u></b></p> |                                                                                                                     |                                                                                                                        |

| <b>III. HYPERLIPIDEMIA or High Blood Cholesterol</b>                                                                                                                                             |                                                                                                                                                                                                          |                                                                                                                                          |
|--------------------------------------------------------------------------------------------------------------------------------------------------------------------------------------------------|----------------------------------------------------------------------------------------------------------------------------------------------------------------------------------------------------------|------------------------------------------------------------------------------------------------------------------------------------------|
| <b>Fill this section if the answer for high blood cholesterol is "yes" in PART-A, Q.1</b>                                                                                                        |                                                                                                                                                                                                          |                                                                                                                                          |
| a. For how long have you had high blood cholesterol?                                                                                                                                             | Duration in years/month<br>Yrs <input type="text"/> <input type="text"/> Mnts <input type="text"/> <input type="text"/>                                                                                  |                                                                                                                                          |
| b. What treatment are you taking for it currently?<br><b>[Yes=1; No=2]</b><br><b>*Traditional medicine / therapy include yoga, ayurveda, unani, homeopathy, Tibetan, naturopathy, meditation</b> | Prescribed dietary modifications<br>Prescribed physical exercise<br>Traditional medicine / therapy*<br>Allopathic drugs (English / modern)<br>None                                                       | <input type="checkbox"/><br><input type="checkbox"/><br><input type="checkbox"/><br><input type="checkbox"/><br><input type="checkbox"/> |
| c. How regular are you in taking your medicines?                                                                                                                                                 | Taking Regularly 1<br>Forget to take occasionally 2<br>Take medicines only when I feel the blood cholesterol is high 3<br>Discontinued for more than a month at a time 4<br>Never taken any medication 5 | <input type="checkbox"/>                                                                                                                 |
| <b>If "4" Q.d otherwise go to Q.e</b>                                                                                                                                                            |                                                                                                                                                                                                          |                                                                                                                                          |
| d. What is the reason for discontinuation?                                                                                                                                                       | Cannot afford 1<br>Cannot tolerate 2<br>I have recovered 3<br>No reason 4<br>Don't remember 5<br>Others (specify) 6                                                                                      | <input type="checkbox"/><br><br><br><br><br><br><b>Others, specify</b><br>_____                                                          |
| e. Do you think your cholesterol is under good control?                                                                                                                                          | Yes 1<br>No 2<br>Don't Know 3                                                                                                                                                                            | <input type="checkbox"/>                                                                                                                 |
| f. Does your doctor say that your cholesterol is under good control?                                                                                                                             | Yes 1<br>No 2<br>Don't Know 3                                                                                                                                                                            | <input type="checkbox"/>                                                                                                                 |
| g. What was total cholesterol level when you last checked it?                                                                                                                                    | _____ mg/dl                                                                                                                                                                                              |                                                                                                                                          |
| h. When was the last time you consulted your doctor?                                                                                                                                             | Less than 1 month 1<br>More than 1 month 2<br>More than 3 months 3<br>Less than 6 months 4<br>More than 6 months 5                                                                                       | <input type="checkbox"/>                                                                                                                 |

|                                                                                                               |                                                                                                                                                        |                                                                                                                                                                  |
|---------------------------------------------------------------------------------------------------------------|--------------------------------------------------------------------------------------------------------------------------------------------------------|------------------------------------------------------------------------------------------------------------------------------------------------------------------|
| i. Do you have medical records or prescriptions related to high blood cholesterol?                            | Yes 1<br>No 2<br>Don't Know 3                                                                                                                          | <input type="checkbox"/>                                                                                                                                         |
| j. If the answer is <b>YES</b> , ask the participant to show the medical records and note the diagnosis below |                                                                                                                                                        |                                                                                                                                                                  |
| k. Note the recorded total cholesterol from the most recent medical record / prescription                     |                                                                                                                                                        |                                                                                                                                                                  |
| <b>IV. HEART DISEASE</b><br>Fill this section if the answer for heart trouble is "YES" in PART-A, Q.1         |                                                                                                                                                        |                                                                                                                                                                  |
| a. When did you first come to know that you have heart disease?                                               | <1 year 1<br>1-5 years 2<br>>5 years 3                                                                                                                 | <input type="checkbox"/>                                                                                                                                         |
| b. What did the doctor say it was?                                                                            | Heart attack 1<br>Angina 2<br>Heart failure 3<br>Valve disease 4<br>Hole in the heart 5<br>Others* 6<br>Not informed about the nature of the problem 7 | <input type="checkbox"/> <input type="checkbox"/> <input type="checkbox"/><br>Use separate boxes for more than one option<br><br><b>Others, specify</b><br><hr/> |
| <b>If "1" go to Q.c otherwise go to Q. g.</b>                                                                 |                                                                                                                                                        |                                                                                                                                                                  |
| c. At what age did you have your 1 <sup>st</sup> heart attack?                                                | Years <input type="text"/> <input type="text"/>                                                                                                        |                                                                                                                                                                  |
| d. Were you hospitalized for treatment?                                                                       | Yes 1<br>No 2                                                                                                                                          | <input type="checkbox"/>                                                                                                                                         |
| e. Did you have any repeat attacks                                                                            | Yes 1<br>No 2                                                                                                                                          | <input type="checkbox"/>                                                                                                                                         |
| f. Were you hospitalized for the subsequent attacks                                                           | Yes 1<br>No 2                                                                                                                                          | <input type="checkbox"/>                                                                                                                                         |



|                                                                                                                                                                                                                        |                                                                                                                                                                                                                                  |                                                                                                                                                         |
|------------------------------------------------------------------------------------------------------------------------------------------------------------------------------------------------------------------------|----------------------------------------------------------------------------------------------------------------------------------------------------------------------------------------------------------------------------------|---------------------------------------------------------------------------------------------------------------------------------------------------------|
| <p>g. What treatment are you taking for heart disease currently?<br/> <b>[Yes=1; No=2]</b><br/> <b>*Traditional medicine / therapy include yoga, ayurveda, unani, homeopathy, Tibetan, naturopathy, meditation</b></p> | <p>Prescribed dietary modifications<br/>         Prescribed physical exercise<br/>         Traditional medicine / therapy*<br/>         Allopathic drugs (English / modern)<br/>         None</p>                                | <p><input type="checkbox"/><br/> <input type="checkbox"/><br/> <input type="checkbox"/><br/> <input type="checkbox"/><br/> <input type="checkbox"/></p> |
| <p>h. How regular are you in taking your medicines?</p>                                                                                                                                                                | <p>Taking Regularly 1<br/>         Forget to take occasionally 2<br/>         Take medicines only when I feel unwell 3<br/>         Discontinued for more than a month at a time 4<br/>         Never taken any medication 5</p> | <p><input type="checkbox"/></p>                                                                                                                         |
| <p><b>If "4" go to Q.i question otherwise go to Q.j.</b></p>                                                                                                                                                           |                                                                                                                                                                                                                                  |                                                                                                                                                         |
| <p>i. What is the reason for discontinuation?</p>                                                                                                                                                                      | <p>Cannot afford 1<br/>         Cannot tolerate 2<br/>         I have recovered 3<br/>         No reason 4<br/>         Don't remember 5<br/>         Others (specify) 6</p>                                                     | <p><input type="checkbox"/><br/> <b>Others, specify</b><br/>         _____</p>                                                                          |
| <p>j. When was the last time you consulted your doctor?</p>                                                                                                                                                            | <p>Less than 1 month 1<br/>         More than 1 month 2<br/>         More than 3 months 3<br/>         Less than 6 months 4<br/>         More than 6 months 5</p>                                                                | <p><input type="checkbox"/></p>                                                                                                                         |
| <p>k. Do you have medical records or prescriptions related to heart trouble?</p>                                                                                                                                       | <p>Yes 1<br/>         No 2<br/>         Don't Know 3</p>                                                                                                                                                                         | <p><input type="checkbox"/></p>                                                                                                                         |
| <p>l. <b>If the answer is 'YES', ask the participant to show the medical records and note the diagnosis below</b></p>                                                                                                  |                                                                                                                                                                                                                                  |                                                                                                                                                         |

| <b>V. STROKE (Paralytic attack)</b>                                                          |                                                 |                                 |
|----------------------------------------------------------------------------------------------|-------------------------------------------------|---------------------------------|
| <b>Fill this section if the answer for stroke (paralytic attack) is "yes" in PART-A, Q.1</b> |                                                 |                                 |
| a. What was your age when you had stroke (Paralytic attack)?                                 | Years <input type="text"/> <input type="text"/> |                                 |
| b. Is there a residual disability in any part of the body?                                   | Yes 1                                           | <input type="checkbox"/>        |
|                                                                                              | No 2                                            |                                 |
| c. If 'YES', does it involve the following?<br>[Yes=1; No=2]                                 | Paralysis of leg/foot                           | <input type="checkbox"/>        |
|                                                                                              | Paralysis of arm/hand                           | <input type="checkbox"/>        |
|                                                                                              | Weakness of leg/foot                            | <input type="checkbox"/>        |
|                                                                                              | Weakness of arm/hand                            | <input type="checkbox"/>        |
|                                                                                              | Defect of speech                                | <input type="checkbox"/>        |
|                                                                                              | Defect of vision                                | <input type="checkbox"/>        |
|                                                                                              | Urinary incontinence                            | <input type="checkbox"/>        |
|                                                                                              | Any other weakness (specify) _____              | <input type="checkbox"/>        |
|                                                                                              |                                                 |                                 |
| d. Are you advised to continue any medication after your paralytic attack?                   | Yes 1                                           | <input type="checkbox"/>        |
|                                                                                              | No 2                                            |                                 |
| e. If YES, how regular are you in taking your medicines?                                     | Taking Regularly 1                              | <input type="checkbox"/>        |
|                                                                                              | Forget to take occasionally 2                   |                                 |
|                                                                                              | Take medicines only when I feel unwell 3        |                                 |
|                                                                                              | Discontinued for more than a month at a time 4  |                                 |
|                                                                                              | Never taken any medication 5                    |                                 |
| <b>If "4" go to Q.f otherwise go to Q.g.</b>                                                 |                                                 |                                 |
| f. What is the reason for discontinuation?                                                   | Cannot afford 1                                 | <input type="checkbox"/>        |
|                                                                                              | Cannot tolerate 2                               |                                 |
|                                                                                              | I have recovered 3                              |                                 |
|                                                                                              | No reason 4                                     |                                 |
|                                                                                              | Don't remember 5                                |                                 |
|                                                                                              | Others (specify) 6                              |                                 |
|                                                                                              |                                                 | <b>Others, specify</b><br>_____ |
| g. When was the last time you consulted your doctor?                                         | Less than 1 month 1                             | <input type="checkbox"/>        |
|                                                                                              | More than 1 month 2                             |                                 |
|                                                                                              | More than 3 months 3                            |                                 |
|                                                                                              | Less than 6 months 4                            |                                 |
|                                                                                              | More than 6 months 5                            |                                 |
| h. Do you have medical records or prescriptions related to Stroke?                           | Yes 1                                           | <input type="checkbox"/>        |
|                                                                                              | No 2                                            |                                 |
|                                                                                              | Don't Know 3                                    |                                 |



i. If the answer is **YES**, ask the participant to show the medical records and note the diagnosis below

## VI. CHRONIC KIDNEY DISEASE

Fill this section if the answer for chronic kidney disease is "YES" in PART-A, Q.1

|                                                                                                                                                                                           |                                                                                                                                                                                   |                      |                                                                                                                                          |
|-------------------------------------------------------------------------------------------------------------------------------------------------------------------------------------------|-----------------------------------------------------------------------------------------------------------------------------------------------------------------------------------|----------------------|------------------------------------------------------------------------------------------------------------------------------------------|
| a. At what age were you diagnosed with chronic kidney disease?                                                                                                                            | Years                                                                                                                                                                             | <input type="text"/> |                                                                                                                                          |
| b. What treatment are you taking for it currently?<br>[Yes=1; No=2]<br><b>*Traditional medicine / therapy include yoga, ayurveda, unani, homeopathy, Tibetan, naturopathy, meditation</b> | Prescribed dietary modifications<br>Prescribed physical exercise<br>Traditional medicine / therapy*<br>Allopathic drugs (English / modern)<br>None                                |                      | <input type="checkbox"/><br><input type="checkbox"/><br><input type="checkbox"/><br><input type="checkbox"/><br><input type="checkbox"/> |
| c. How regular are you in taking your medicines?                                                                                                                                          | Taking Regularly 1<br>Forget to take occasionally 2<br>Take medicines only when I feel unwell 3<br>Discontinued for more than a month at a time 4<br>Never taken any medication 5 |                      | <input type="checkbox"/>                                                                                                                 |
| <b>If "4" go Q.d otherwise go to Q. e.</b>                                                                                                                                                |                                                                                                                                                                                   |                      |                                                                                                                                          |
| d. What is the reason for discontinuation?                                                                                                                                                | Cannot afford 1<br>Cannot tolerate 2<br>I have recovered 3<br>No reason 4<br>Don't remember 5<br>Others (specify) 6                                                               |                      | <input type="checkbox"/><br><b>Others, specify</b><br>_____                                                                              |
| e. When was the last time you consulted your doctor?                                                                                                                                      | Less than 1 month 1<br>More than 1 month 2<br>More than 3 months 3<br>Less than 6 months 4<br>More than 6 months 5                                                                |                      | <input type="checkbox"/>                                                                                                                 |
| f. Do you have medical records or prescriptions related to chronic kidney disease?                                                                                                        | Yes 1<br>No 2<br>Don't Know 3                                                                                                                                                     |                      | <input type="checkbox"/>                                                                                                                 |

g. If the answer is **YES**, ask the participant to show the medical records and note the diagnosis below


**PART - C: ANGINA, PERIPHERAL VASCULAR DISEASE AND HEART FAILURE**
**I. ANGINA**

a. Do you have any of the following symptoms?

**[Yes=1; No=2]**

 Palpitation  
 Chest pain  
 Breathlessness  
 Fatigue/weakness  
 Chest discomfort/heaviness/pressure

  
  
  
  

**"2" for all, skip to Q. m**

b. With exertion\*, have you ever had any of the following symptoms in and around the chest, arms, shoulders, neck, lower jaw, abdomen or upper back?

\*walking fast, climbing stairs, lifting weights, etc

**[Yes=1; No=2]**

 Pain  
 Heaviness  
 Pressure  
 Discomfort  
 Numbness

  
  
  
  

**"2" for all, skip to Q. d**

c. Where did you mostly feel the (symptoms noted in Q.b)?

**[Yes=1; No=2]**

(Please specify the location from the numbered diagram below)

**Additional numbers: back of chest = 11, back of neck = 12)**
**Symptom**
**Location**

 Pain  
 Heaviness  
 Discomfort  
 Numbness

  
  
  


|                          |                          |
|--------------------------|--------------------------|
| <input type="checkbox"/> | <input type="checkbox"/> |
| <input type="checkbox"/> | <input type="checkbox"/> |
| <input type="checkbox"/> | <input type="checkbox"/> |
| <input type="checkbox"/> | <input type="checkbox"/> |

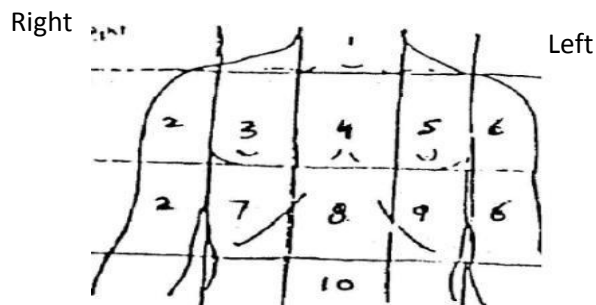

d. Do you feel any of the above symptoms anywhere else?

 Yes 1  
 No 2

If 'YES', specify:

Symptom: \_\_\_\_\_

Location: \_\_\_\_\_

**Fill Q.e to Q.l only if you have noted "1" for any of the symptoms in Q.b and Q.c, OTHERWISE GO TO Q.m**

|                                                                                                                          |                                                      |                                           |                                                                                  |
|--------------------------------------------------------------------------------------------------------------------------|------------------------------------------------------|-------------------------------------------|----------------------------------------------------------------------------------|
| e. Do you get the above symptoms, or breathlessness, or palpitation when you walk uphill or climb steps or walking fast? | Yes<br>No<br>Never walk uphill/hurry                 | 1<br>2<br>3                               | <input type="checkbox"/>                                                         |
| f. Do you get it when you walk at an ordinary pace on the level ground?                                                  | Yes<br>No                                            | 1<br>2                                    | <input type="checkbox"/>                                                         |
| g. Do you get a similar symptoms while you are resting or after a meal?                                                  | Yes<br>No                                            | 1<br>2                                    | <input type="checkbox"/>                                                         |
| h. What do you usually do if you get it while you are exerting?                                                          | Stop<br>Slow down<br>Carry on at the same pace       | 1<br>2<br>3                               | <input type="checkbox"/>                                                         |
| i. Does it go away if you slow down or stand still?                                                                      | Yes<br>No                                            | 1<br>2                                    | <input type="checkbox"/><br>"2" go to Q.k                                        |
| j. If 'YES' to Q. i, how soon does it usually go away?                                                                   | < 3 mins<br>3-20 mts<br>>20 mts                      | 1<br>2<br>3                               | <input type="checkbox"/>                                                         |
| k. Do you take usually a pill under the tongue to get relief?                                                            | Yes<br>No                                            | 1<br>2                                    | <input type="checkbox"/><br>"2" go to Q.m                                        |
| l. If 'YES', how soon does it go away?                                                                                   | < 2mts<br>2-5 mts<br>6-10 mts<br>>10 mts             | 1<br>2<br>3<br>4                          | <input type="checkbox"/>                                                         |
| m. Have you ever had a severe pain or discomfort in the front of your chest lasting for half an hour or more?            | Yes<br>No                                            | 1<br>2                                    | <input type="checkbox"/><br>"2", go to the next section                          |
| n. If 'YES', was the pain or discomfort accompanied by -<br><b>[Yes=1; No=2]</b>                                         | Cold clammy skin<br>Breathing difficulty<br>Sweating |                                           | <input type="checkbox"/><br><input type="checkbox"/><br><input type="checkbox"/> |
| o. How old were you when you had such a severe pain in the chest?                                                        | Years                                                | <input type="text"/> <input type="text"/> |                                                                                  |
| p. How many of these attacks have you had?                                                                               |                                                      |                                           | <input type="text"/> <input type="text"/>                                        |
| q. Have you ever had an ECG done?                                                                                        | Yes<br>No                                            | 1<br>2                                    | <input type="checkbox"/>                                                         |
| r. Did you see a doctor because of the pain?                                                                             | Yes<br>No                                            | 1<br>2                                    | <input type="checkbox"/>                                                         |





| <b>II. PERIPHERAL VASCULAR DISEASE</b>                                                              |                                   |   |                                                           |
|-----------------------------------------------------------------------------------------------------|-----------------------------------|---|-----------------------------------------------------------|
| a. Do you get pain in either leg on walking?                                                        | Yes                               | 1 | <input type="checkbox"/><br><b>"2" go to the Part III</b> |
|                                                                                                     | No                                | 2 |                                                           |
| b. If <b>YES</b> , in what part of your leg do you feel it?                                         | Pain includes calf / calves       | 1 | <input type="checkbox"/><br><b>"2" go to the Part III</b> |
|                                                                                                     | Pain does not include calf/claves | 2 |                                                           |
| c. Do you get it if you climb stairs or walking fast?                                               | Yes                               | 1 | <input type="checkbox"/><br><b>"2" go to the Part III</b> |
|                                                                                                     | No                                | 2 |                                                           |
|                                                                                                     | Not Applicable                    | 3 |                                                           |
| d. Do you get it if you walk at an ordinary pace on the level ground?                               | Yes                               | 1 | <input type="checkbox"/>                                  |
|                                                                                                     | No                                | 2 |                                                           |
| e. Does the pain ever disappear while you are still walking?                                        | Yes                               | 1 | <input type="checkbox"/><br><b>"1" go to the Part III</b> |
|                                                                                                     | No                                | 2 |                                                           |
| f. What do you do if you get it when you are walking?                                               | Stop or slacken pace              | 1 | <input type="checkbox"/><br><b>"2" go to the Part III</b> |
|                                                                                                     | carry on                          | 2 |                                                           |
| g. What happens to it if you stand still?                                                           | Relieved                          | 1 | <input type="checkbox"/><br><b>"2" go to the Part III</b> |
|                                                                                                     | Not Relieved                      | 2 |                                                           |
| h. If relieved, how soon?                                                                           | 10 minutes or less                | 1 | <input type="checkbox"/>                                  |
|                                                                                                     | more than 10 minutes              | 2 |                                                           |
| <b>III. HEART FAILURE</b>                                                                           |                                   |   |                                                           |
| a. Are you unable to walk due to physical disability?                                               | Yes                               | 1 | <input type="checkbox"/><br><b>"1" skip to Q. e</b>       |
|                                                                                                     | No                                | 2 |                                                           |
| b. Do you ever get short of breath while walking with other people of your own age on level ground? | Yes                               | 1 | <input type="checkbox"/>                                  |
|                                                                                                     | No                                | 2 |                                                           |
| c. On walking uphill or upstairs, do you get more breathless than people of your own age?           | Yes                               | 1 | <input type="checkbox"/><br><b>"2" go to Q. e</b>         |
|                                                                                                     | No                                | 2 |                                                           |
| d. Do you ever have to stop walking because of breathlessness?                                      | Yes                               | 1 | <input type="checkbox"/>                                  |
|                                                                                                     | No                                | 2 |                                                           |
| e. In the past years have you at any time awoken at night by an attack of shortness of breath?      | Yes                               | 1 | <input type="checkbox"/><br><b>"2" go to Q. g</b>         |
|                                                                                                     | No                                | 2 |                                                           |

|                                                                                                                    |                                                                     |   |                          |
|--------------------------------------------------------------------------------------------------------------------|---------------------------------------------------------------------|---|--------------------------|
| f. For how long have you had this problem?                                                                         | Less than one year                                                  | 1 | <input type="checkbox"/> |
|                                                                                                                    | More than one year                                                  | 2 |                          |
| g. Do you have swelling in your ankles?                                                                            | Yes                                                                 | 1 | <input type="checkbox"/> |
|                                                                                                                    | No                                                                  | 2 |                          |
| h. Have you been told by your doctor at any time that you are suffering from any lung disease (COPD, Asthma, etc)? | Yes                                                                 | 1 | <input type="checkbox"/> |
|                                                                                                                    | No                                                                  | 2 |                          |
| i. Do you have a cardiac device?                                                                                   | Yes                                                                 | 1 | <input type="checkbox"/> |
|                                                                                                                    | No                                                                  | 2 |                          |
| j. If "YES", name the device                                                                                       | Standard pacemaker                                                  | 1 | <input type="checkbox"/> |
|                                                                                                                    | Implantable Cardioverter defibrillator (ICD)                        | 2 |                          |
|                                                                                                                    | Cardiac resynchronisation therapy device with defibrillator (CRT-D) | 3 |                          |

**PART - D: COMPLICATIONS**

**Complete the following sections only if you have filled the "diabetes section" (2) in PART-B**

**I. FOOT ULCERS AND AMPUTATION**

|                                                                                                                |                                                                                                                     |   |                                                   |
|----------------------------------------------------------------------------------------------------------------|---------------------------------------------------------------------------------------------------------------------|---|---------------------------------------------------|
| a. Have you ever had a non healing ulcer/sore in the foot that took more than 4 weeks to heal?                 | Yes                                                                                                                 | 1 | <input type="checkbox"/>                          |
|                                                                                                                | No                                                                                                                  | 2 |                                                   |
| b. Do you walk around bare foot?                                                                               | Yes                                                                                                                 | 1 | <input type="checkbox"/>                          |
|                                                                                                                | No                                                                                                                  | 2 |                                                   |
| c. Have you had an amputation?                                                                                 | Yes                                                                                                                 | 1 | <input type="checkbox"/>                          |
|                                                                                                                | No                                                                                                                  | 2 |                                                   |
| <b>"2" go to Part II</b>                                                                                       |                                                                                                                     |   |                                                   |
| d. If 'YES' When?                                                                                              | years before <input type="text"/> <input type="text"/> (or) months before <input type="text"/> <input type="text"/> |   |                                                   |
| e. Level of amputation                                                                                         | Toe                                                                                                                 | 1 | <input type="checkbox"/>                          |
|                                                                                                                | Below ankle                                                                                                         | 2 |                                                   |
|                                                                                                                | Below knee                                                                                                          | 3 |                                                   |
|                                                                                                                | Above Knee                                                                                                          | 4 |                                                   |
| f. What was the cause for amputation?                                                                          | Injury                                                                                                              | 1 | <input type="checkbox"/> <input type="checkbox"/> |
|                                                                                                                | Diabetes                                                                                                            | 2 |                                                   |
|                                                                                                                | Infection                                                                                                           | 3 |                                                   |
|                                                                                                                | Other                                                                                                               | 4 |                                                   |
|                                                                                                                |                                                                                                                     |   | Others specify<br>_____                           |
| g. Do you have medical records or prescriptions?                                                               | Yes                                                                                                                 | 1 | <input type="checkbox"/>                          |
|                                                                                                                | No                                                                                                                  | 2 |                                                   |
|                                                                                                                | Don't Know                                                                                                          | 3 |                                                   |
| h. If the answer is 'YES', ask the participant to show the medical records and note the <i>diagnosis below</i> |                                                                                                                     |   |                                                   |



| II. EYES                                                                                                                                                                                                                                                                                                                        |                         |                                                                                                                                                                               |                                                         |
|---------------------------------------------------------------------------------------------------------------------------------------------------------------------------------------------------------------------------------------------------------------------------------------------------------------------------------|-------------------------|-------------------------------------------------------------------------------------------------------------------------------------------------------------------------------|---------------------------------------------------------|
| a. Do you have difficulty with your eyesight other than your ordinary power glasses (spectacles)?                                                                                                                                                                                                                               | Yes<br>No               | 1<br>2                                                                                                                                                                        | <input type="checkbox"/><br><b>"2" skip the section</b> |
| b. If <b>'YES'</b> , were you told that your poor eyesight is due to complications of diabetes?                                                                                                                                                                                                                                 | Yes<br>No               | 1<br>2                                                                                                                                                                        | <input type="checkbox"/><br><b>"2" skip the section</b> |
| c. If <b>'YES'</b> , what was the diagnosis?                                                                                                                                                                                                                                                                                    |                         |                                                                                                                                                                               |                                                         |
| d. Have you undergone laser therapy (Photocoagulation) at anytime                                                                                                                                                                                                                                                               | Yes<br>No               | 1<br>2                                                                                                                                                                        | <input type="checkbox"/>                                |
| e. Do you have medical records or prescriptions?                                                                                                                                                                                                                                                                                | Yes<br>No<br>Don't know | 1<br>2<br>3                                                                                                                                                                   | <input type="checkbox"/>                                |
| f. If the answer is <b>YES</b> , ask the participant to show the medical records and note the diagnosis below                                                                                                                                                                                                                   |                         |                                                                                                                                                                               |                                                         |
| PART – E: RESPIRATORY DISEASE                                                                                                                                                                                                                                                                                                   |                         |                                                                                                                                                                               |                                                         |
| 1. In the past 12 months, have you had chronic <b>cough</b> and chronic mucous production on <b>most</b> days or nights of the week (during at least three months in a row)? <b>[Yes=1; No=2]</b><br><b>Cough</b> means cough even when you are not suffering from cold<br><b>Most</b> means at least 4 days or nights per week |                         | <input type="checkbox"/>                                                                                                                                                      |                                                         |
| a. If <b>'YES'</b>                                                                                                                                                                                                                                                                                                              |                         | i. How many episodes of such cough have you had in the past 12 months?<br><input type="checkbox"/> <input type="checkbox"/>                                                   |                                                         |
|                                                                                                                                                                                                                                                                                                                                 |                         | ii. Have you suffered from any infections that required medical attention in the past 12 months? <b>[Yes=1; No=2]</b><br><input type="checkbox"/>                             |                                                         |
|                                                                                                                                                                                                                                                                                                                                 |                         | iii. How many times did you seek medical attention in the past 12 months?<br><input type="checkbox"/> <input type="checkbox"/>                                                |                                                         |
| 2. Have you seen a doctor or health practitioner for a chest infection (excluding TB) in the past 12 months? <b>[Yes=1; No=2]</b>                                                                                                                                                                                               |                         | <input type="checkbox"/>                                                                                                                                                      |                                                         |
| a. If <b>'YES'</b>                                                                                                                                                                                                                                                                                                              |                         | i. How many episodes in the past 12 months?<br><input type="checkbox"/> <input type="checkbox"/>                                                                              |                                                         |
|                                                                                                                                                                                                                                                                                                                                 |                         | ii. How many were doctor-diagnosed?<br><input type="checkbox"/> <input type="checkbox"/>                                                                                      |                                                         |
|                                                                                                                                                                                                                                                                                                                                 |                         | iii. For how long have you had such infection?<br>Yrs <input type="checkbox"/> <input type="checkbox"/> Mnts <input type="checkbox"/> <input type="checkbox"/>                |                                                         |
|                                                                                                                                                                                                                                                                                                                                 |                         | iv. Did you take antibiotics for these infections?<br><input type="checkbox"/><br><b>[Yes=1; No=2; Don't know=3]</b>                                                          |                                                         |
| 3. Have you been hospitalized for a chest infection/pneumonia in the past 12 months? <b>[Yes=1; No=2]</b>                                                                                                                                                                                                                       |                         | <input type="checkbox"/>                                                                                                                                                      |                                                         |
| a. If <b>'YES'</b> , Length of stay                                                                                                                                                                                                                                                                                             |                         | <input type="checkbox"/> <input type="checkbox"/> days<br><input type="checkbox"/> <input type="checkbox"/> weeks<br><input type="checkbox"/> <input type="checkbox"/> months |                                                         |



|                                                                                                                       |                                                   |
|-----------------------------------------------------------------------------------------------------------------------|---------------------------------------------------|
| 4. Do you currently suffer from asthma?<br><b>[Yes=1; No=2]</b>                                                       | <input type="checkbox"/>                          |
| a. IF 'YES'                                                                                                           |                                                   |
| i. How many attacks of asthma have you had in the past 12 months?                                                     | <input type="checkbox"/> <input type="checkbox"/> |
| ii. Have you suffered from any infections that required medical attention in the past 12 months? <b>[Yes=1; No=2]</b> | <input type="checkbox"/>                          |
| iii. How many times did you seek medical attention in the past 12 months?                                             | <input type="checkbox"/> <input type="checkbox"/> |

|                                                                                                    |                          |
|----------------------------------------------------------------------------------------------------|--------------------------|
| 5. Have you ever been diagnosed with TB in past 5 years?<br><b>[Yes=1; No=2; Don't remember=3]</b> | <input type="checkbox"/> |
|----------------------------------------------------------------------------------------------------|--------------------------|

**PART – F: FAMILY HISTORY**

|                                                                                                                                                        |                                                                                                                                                          |                                                                                                              |
|--------------------------------------------------------------------------------------------------------------------------------------------------------|----------------------------------------------------------------------------------------------------------------------------------------------------------|--------------------------------------------------------------------------------------------------------------|
| 1. Has anyone in your family suffered from any of the following diseases, <b>before the age of 60 years?</b><br><br><b>[Yes=1; No=2; Don't know=3]</b> | High blood pressure<br>Heart disease*<br>Diabetes mellitus (High Blood Sugar)<br>Stroke (paralytic attack)<br><b>*Angina/ heart attack/heart failure</b> | <input type="checkbox"/><br><input type="checkbox"/><br><input type="checkbox"/><br><input type="checkbox"/> |
|--------------------------------------------------------------------------------------------------------------------------------------------------------|----------------------------------------------------------------------------------------------------------------------------------------------------------|--------------------------------------------------------------------------------------------------------------|

2. Fill the table below

| Relationship to the family member                                                                          | Disease condition (refer to the codes below)* | Age at diagnosis (in years) | If dead, age at which the family member died |
|------------------------------------------------------------------------------------------------------------|-----------------------------------------------|-----------------------------|----------------------------------------------|
| Father                                                                                                     |                                               |                             |                                              |
| Mother                                                                                                     |                                               |                             |                                              |
| Son                                                                                                        |                                               |                             |                                              |
| Daughter                                                                                                   |                                               |                             |                                              |
| Paternal Grandfather                                                                                       |                                               |                             |                                              |
| Paternal Grandmother                                                                                       |                                               |                             |                                              |
| Maternal Grandfather                                                                                       |                                               |                             |                                              |
| Maternal Grandmother                                                                                       |                                               |                             |                                              |
| Brother                                                                                                    |                                               |                             |                                              |
| Sister                                                                                                     |                                               |                             |                                              |
| Paternal uncle                                                                                             |                                               |                             |                                              |
| Paternal aunt                                                                                              |                                               |                             |                                              |
| Maternal uncle                                                                                             |                                               |                             |                                              |
| Maternal aunt                                                                                              |                                               |                             |                                              |
| <b>For others, please write the relationship to the participant and provide the required details below</b> |                                               |                             |                                              |
|                                                                                                            |                                               |                             |                                              |
|                                                                                                            |                                               |                             |                                              |
|                                                                                                            |                                               |                             |                                              |

\*Disease condition: Diabetes = 1, heart disease = 2, high blood pressure = 3, Stroke = 4


**SECTION – 6: TREATMENT HISTORY AND EXPENDITURES**
**PART A: OUTPATIENT**

|                                                                                                                 |                                                                                                                                                             |                                                                                                                                                                      |
|-----------------------------------------------------------------------------------------------------------------|-------------------------------------------------------------------------------------------------------------------------------------------------------------|----------------------------------------------------------------------------------------------------------------------------------------------------------------------|
| 1. Are you undergoing treatment as an out-patient for any of the following reasons?<br><br><b>[Yes=1; No=2]</b> | Heart disease<br>Stroke<br>Diabetes<br>Diabetic complications (infections, retinopathy, nephropathy, etc.)<br>High blood pressure<br>Chronic Kidney disease | <input type="checkbox"/><br><input type="checkbox"/><br><input type="checkbox"/><br><input type="checkbox"/><br><input type="checkbox"/><br><input type="checkbox"/> |
|-----------------------------------------------------------------------------------------------------------------|-------------------------------------------------------------------------------------------------------------------------------------------------------------|----------------------------------------------------------------------------------------------------------------------------------------------------------------------|

If the answer to any of the above is "YES" go to the next section **OTHERWISE** skip to PART B

**In the following questions ask the details of treatment and cost only for the last 12 months**

|                                                                                         |                                                                                                                                                                                                                                                                                                                                                                                                                                                                                            |            |   |         |   |         |   |        |   |                                                          |
|-----------------------------------------------------------------------------------------|--------------------------------------------------------------------------------------------------------------------------------------------------------------------------------------------------------------------------------------------------------------------------------------------------------------------------------------------------------------------------------------------------------------------------------------------------------------------------------------------|------------|---|---------|---|---------|---|--------|---|----------------------------------------------------------|
| 2. How many times did do you visit a health facility/doctor/therapist in past 12 month? | <input type="text"/> <input type="text"/>                                                                                                                                                                                                                                                                                                                                                                                                                                                  |            |   |         |   |         |   |        |   |                                                          |
| 3. Type of health facility/doctor/therapist                                             | <table style="width: 100%; border-collapse: collapse;"> <tr> <td style="padding: 2px;">Government</td> <td style="text-align: right; padding: 2px;">1</td> </tr> <tr> <td style="padding: 2px;">Private</td> <td style="text-align: right; padding: 2px;">2</td> </tr> <tr> <td style="padding: 2px;">Charity</td> <td style="text-align: right; padding: 2px;">3</td> </tr> <tr> <td style="padding: 2px;">Others</td> <td style="text-align: right; padding: 2px;">4</td> </tr> </table> | Government | 1 | Private | 2 | Charity | 3 | Others | 4 | <input type="checkbox"/><br><b>Others, specify</b> _____ |
| Government                                                                              | 1                                                                                                                                                                                                                                                                                                                                                                                                                                                                                          |            |   |         |   |         |   |        |   |                                                          |
| Private                                                                                 | 2                                                                                                                                                                                                                                                                                                                                                                                                                                                                                          |            |   |         |   |         |   |        |   |                                                          |
| Charity                                                                                 | 3                                                                                                                                                                                                                                                                                                                                                                                                                                                                                          |            |   |         |   |         |   |        |   |                                                          |
| Others                                                                                  | 4                                                                                                                                                                                                                                                                                                                                                                                                                                                                                          |            |   |         |   |         |   |        |   |                                                          |

4. List the expenditures incurred towards the above mentioned conditions (Q.1) separately in each table

4.i. Disease \_\_\_\_\_

| Nature of expenditure                                                                           | Frequency | Amount spent in Rs per visit/<br>test/remuneration to home nurse or carer |
|-------------------------------------------------------------------------------------------------|-----------|---------------------------------------------------------------------------|
| Visit to Doctor (fees)                                                                          |           |                                                                           |
| No. of months home nurse / carer was hired                                                      |           |                                                                           |
| Tests                                                                                           |           |                                                                           |
| Physical or occupational rehabilitation                                                         |           |                                                                           |
| Others (Specify) _____                                                                          |           |                                                                           |
| Medications ( <b>average amount spent in last 12 months for the above mentioned condition</b> ) |           |                                                                           |
| <b>Total expenditure in past 12 months</b>                                                      |           |                                                                           |



4.ii. Disease \_\_\_\_\_

| Nature of expenditure                                                                           | Frequency | Amount spent in RS per visit / test/remuneration to home nurse or carer |
|-------------------------------------------------------------------------------------------------|-----------|-------------------------------------------------------------------------|
| Visit to Doctor (fees)                                                                          |           |                                                                         |
| No. of months home nurse / career was hired                                                     |           |                                                                         |
| Tests                                                                                           |           |                                                                         |
| Physical or occupational rehabilitation                                                         |           |                                                                         |
| Others (Specify)_____                                                                           |           |                                                                         |
| Medications ( <i>average amount spent in last 12 months for the above mentioned condition</i> ) |           |                                                                         |
| <b>Total expenditure in past 12 months</b>                                                      |           |                                                                         |

4.iii. Disease \_\_\_\_\_

| Nature of expenditure                                                                           | Frequency | Amount spent in RS per visit/ test/remuneration to home nurse or carer |
|-------------------------------------------------------------------------------------------------|-----------|------------------------------------------------------------------------|
| Visit to Doctor (fees)                                                                          |           |                                                                        |
| No. of months home nurse / career was hired                                                     |           |                                                                        |
| Tests                                                                                           |           |                                                                        |
| Physical or occupational rehabilitation                                                         |           |                                                                        |
| Others (Specify)_____                                                                           |           |                                                                        |
| Medications ( <i>average amount spent in last 12 months for the above mentioned condition</i> ) |           |                                                                        |
| <b>Total expenditure in past 12 months</b>                                                      |           |                                                                        |

4.iv. Disease \_\_\_\_\_

| Nature of expenditure                                                                           | Frequency | Amount spent in RS per visit/ test/remuneration to home nurse or carer |
|-------------------------------------------------------------------------------------------------|-----------|------------------------------------------------------------------------|
| Visit to Doctor (fees)                                                                          |           |                                                                        |
| No. of months home nurse / career was hired                                                     |           |                                                                        |
| Tests                                                                                           |           |                                                                        |
| Physical or occupational rehabilitation                                                         |           |                                                                        |
| Others (Specify)_____                                                                           |           |                                                                        |
| Medications ( <i>average amount spent in last 12 months for the above mentioned condition</i> ) |           |                                                                        |
| <b>Total expenditure in past 12 months</b>                                                      |           |                                                                        |

|                                                                                                                                           |                                                                                                                                                                                                                                                                                                      |                                                                                                                                                                                                                              |
|-------------------------------------------------------------------------------------------------------------------------------------------|------------------------------------------------------------------------------------------------------------------------------------------------------------------------------------------------------------------------------------------------------------------------------------------------------|------------------------------------------------------------------------------------------------------------------------------------------------------------------------------------------------------------------------------|
| 5. Did you get any reimbursement from insurance?                                                                                          | Yes 1<br>No 2<br>Don't know 3<br>Don't have any insurance 4                                                                                                                                                                                                                                          | <input type="checkbox"/>                                                                                                                                                                                                     |
| 6. If <b>YES</b> , of the above mentioned expenditure how much was reimbursed (in RS)?                                                    | RS _____                                                                                                                                                                                                                                                                                             |                                                                                                                                                                                                                              |
| 7. Time taken to reach the health facility/doctor/therapist?                                                                              | <input type="text"/> <input type="text"/> : <input type="text"/> <input type="text"/><br>HR MIN                                                                                                                                                                                                      |                                                                                                                                                                                                                              |
| 8. Transport cost to visit the above mentioned health facility/doctor/therapist*                                                          | RS _____                                                                                                                                                                                                                                                                                             |                                                                                                                                                                                                                              |
| <b>*If the participant has a private vehicle, ask him to give you an estimate of the amount spent on fuel to travel</b>                   |                                                                                                                                                                                                                                                                                                      |                                                                                                                                                                                                                              |
| 9. Average time spent at health facility                                                                                                  | <input type="text"/> <input type="text"/> : <input type="text"/> <input type="text"/><br>HR MIN                                                                                                                                                                                                      |                                                                                                                                                                                                                              |
| 10. Are you getting proper medical attention?<br>[Yes=1; No=2]                                                                            | <input type="checkbox"/>                                                                                                                                                                                                                                                                             |                                                                                                                                                                                                                              |
| 10.a. If "No"<br>What has prevented you from getting medical attention?                                                                   | Not available 1<br>No one to help me get there 2<br>Too far 3<br>Too expensive 4<br>Don't want to spend money 5<br>Complicated procedures for care seeking 6<br>Too long a wait 7<br>Too sick to make the trip 8<br>Do not trust medical care 9<br>Do not know where to go 10<br>Others (Specify) 11 | <input type="checkbox"/><br><br><input type="checkbox"/><br><br><input type="checkbox"/><br><br><input type="checkbox"/><br><br>If other, specify<br>_____                                                                   |
| 11. How did you pay for your treatment and visits?<br>[Yes=1; No=2]                                                                       | Own saving<br>Family members paid<br>Employer paid<br>Borrowed from friend, relatives & employer<br>Borrowed from bank<br>Sold house, land or other assets<br>Health insurance<br>Others (specify) _____                                                                                             | <input type="checkbox"/><br><input type="checkbox"/><br><input type="checkbox"/><br><input type="checkbox"/><br><input type="checkbox"/><br><input type="checkbox"/><br><input type="checkbox"/><br><input type="checkbox"/> |
| 12. On an average what proportion of money in percentage (%) did you spent from the above mentioned source for your treatment and visits? | Own saving<br>Family members paid<br>Employer paid<br>Borrowed from friend, relatives & employer<br>Borrowed from bank<br>Sold house, land or other assets<br>Health insurance<br>Others (Specify) _____                                                                                             | _____ %<br>_____ %<br>_____ %<br>_____ %<br>_____ %<br>_____ %<br>_____ %                                                                                                                                                    |

| PART B: INPATIENT                                                                                                                                                                                                                                     |                                                                                                                                                                                                 |             |                                                                                                                                                                                                                                                          |
|-------------------------------------------------------------------------------------------------------------------------------------------------------------------------------------------------------------------------------------------------------|-------------------------------------------------------------------------------------------------------------------------------------------------------------------------------------------------|-------------|----------------------------------------------------------------------------------------------------------------------------------------------------------------------------------------------------------------------------------------------------------|
| 1. Were you hospitalized for any illness in the <b>past 12 months</b> ?                                                                                                                                                                               | Yes<br>No<br>Don't remember                                                                                                                                                                     | 1<br>2<br>3 | <input type="checkbox"/><br><b>"2 &amp; 3" go to Q.4</b>                                                                                                                                                                                                 |
| 2. If <b>YES</b> , how many times?                                                                                                                                                                                                                    | <input type="text"/> <input type="text"/>                                                                                                                                                       |             |                                                                                                                                                                                                                                                          |
| 3. Were you admitted for any of the following reasons?<br><br><b>[Yes=1; No=2]</b>                                                                                                                                                                    | Heart disease<br>Stroke<br>Diabetes<br>Diabetic complications (infections, retinopathy, nephropathy, etc.)<br>High blood pressure<br>Chronic Kidney disease                                     |             | <input type="checkbox"/><br><input type="checkbox"/><br><input type="checkbox"/><br><input type="checkbox"/><br><input type="checkbox"/><br><input type="checkbox"/>                                                                                     |
| 4. Have you undergone any surgical procedure in the <b>past 12 months</b> ?                                                                                                                                                                           | Yes<br>No<br>Don't remember                                                                                                                                                                     | 1<br>2<br>3 | <input type="checkbox"/><br><b>"2 &amp; 3" go to Q.6</b>                                                                                                                                                                                                 |
| 5. If yes, what was the procedure?<br><br><b>[Yes=1; No=2]</b>                                                                                                                                                                                        | Revascularisation / bypass<br>Valve repair/replacement<br>Pacemaker<br>Amputation<br>Abscess<br>Renal transplantation<br>Heart transplant<br>Retinal photocoagulation<br>Others (Specify _____) |             | <input type="checkbox"/><br><input type="checkbox"/><br><input type="checkbox"/><br><input type="checkbox"/><br><input type="checkbox"/><br><input type="checkbox"/><br><input type="checkbox"/><br><input type="checkbox"/><br><input type="checkbox"/> |
| 6. Do you have medical records related to hospitalization / surgical procedure?                                                                                                                                                                       | Yes<br>No                                                                                                                                                                                       | 1<br>2      | <input type="checkbox"/>                                                                                                                                                                                                                                 |
| <i>If the answer is <b>YES</b>, ask the participant to show the medical records and note the diagnosis in a chronological order separately for hospitalisation due to illness and surgical procedures mentioned above in the space provided below</i> |                                                                                                                                                                                                 |             |                                                                                                                                                                                                                                                          |
| Hospitalisation                                                                                                                                                                                                                                       |                                                                                                                                                                                                 |             |                                                                                                                                                                                                                                                          |
| <hr/>                                                                                                                                                                                                                                                 |                                                                                                                                                                                                 |             |                                                                                                                                                                                                                                                          |
| <hr/>                                                                                                                                                                                                                                                 |                                                                                                                                                                                                 |             |                                                                                                                                                                                                                                                          |
| <hr/>                                                                                                                                                                                                                                                 |                                                                                                                                                                                                 |             |                                                                                                                                                                                                                                                          |
| <hr/>                                                                                                                                                                                                                                                 |                                                                                                                                                                                                 |             |                                                                                                                                                                                                                                                          |
| <hr/>                                                                                                                                                                                                                                                 |                                                                                                                                                                                                 |             |                                                                                                                                                                                                                                                          |



Surgical procedure

Comments

**PART C: HOSPITALISATION COST**

**Fill this section only if the participant has undergone hospitalisation due to illness or procedure mentioned in question 3 and 5 of part B, otherwise end the interview and thank the participant.**

**For each hospitalisation note the following details, starting with the first hospitalisation in past 12 months. If the number of hospitalisation is more than three then use a second form to complete the history.**

| Sl. No | Questions                                   | 1                                                                                                                                             | 2                                                                                                                                             | 3                                                                                                                                             |
|--------|---------------------------------------------|-----------------------------------------------------------------------------------------------------------------------------------------------|-----------------------------------------------------------------------------------------------------------------------------------------------|-----------------------------------------------------------------------------------------------------------------------------------------------|
| 1      | When were you hospitalized?                 | <input type="text"/> <input type="text"/> <input type="text"/> <input type="text"/> <input type="text"/> <input type="text"/><br>MM      YYYY | <input type="text"/> <input type="text"/> <input type="text"/> <input type="text"/> <input type="text"/> <input type="text"/><br>MM      YYYY | <input type="text"/> <input type="text"/> <input type="text"/> <input type="text"/> <input type="text"/> <input type="text"/><br>MM      YYYY |
| 2      | How many days did you stay in the hospital? | Days <input type="text"/> <input type="text"/>                                                                                                | Days <input type="text"/> <input type="text"/>                                                                                                | Days <input type="text"/> <input type="text"/>                                                                                                |
| 3      | Type of hospital?<br><br>[Yes=1; No=2]      | Government <input type="checkbox"/><br>Private <input type="checkbox"/><br>Charity <input type="checkbox"/><br>Other <input type="checkbox"/> | Government <input type="checkbox"/><br>Private <input type="checkbox"/><br>Charity <input type="checkbox"/><br>Other <input type="checkbox"/> | Government <input type="checkbox"/><br>Private <input type="checkbox"/><br>Charity <input type="checkbox"/><br>Other <input type="checkbox"/> |
| 4      | Name of hospital<br>(Address)               |                                                                                                                                               |                                                                                                                                               |                                                                                                                                               |

|    |                                                                                                                                                                      |                                                                                                                                                                                                                                                                                                                                                                                                                                                                                                                                                                                                                                                             |                                                                                                                                                                                                                                                                                                                                                                                                                                                                                                                                                                                                                                                             |                                                                                                                                                                                                                                                                                                                                                                                                                                                                                                                                                                                                                                                             |
|----|----------------------------------------------------------------------------------------------------------------------------------------------------------------------|-------------------------------------------------------------------------------------------------------------------------------------------------------------------------------------------------------------------------------------------------------------------------------------------------------------------------------------------------------------------------------------------------------------------------------------------------------------------------------------------------------------------------------------------------------------------------------------------------------------------------------------------------------------|-------------------------------------------------------------------------------------------------------------------------------------------------------------------------------------------------------------------------------------------------------------------------------------------------------------------------------------------------------------------------------------------------------------------------------------------------------------------------------------------------------------------------------------------------------------------------------------------------------------------------------------------------------------|-------------------------------------------------------------------------------------------------------------------------------------------------------------------------------------------------------------------------------------------------------------------------------------------------------------------------------------------------------------------------------------------------------------------------------------------------------------------------------------------------------------------------------------------------------------------------------------------------------------------------------------------------------------|
| 5  | What type of treatment/procedure/surgery did you undergo?<br><br><b>(Cross-check with the medical records and information in PART-A)</b><br><br><b>[Yes=1; No=2]</b> | Medicines <input type="checkbox"/><br>Thrombolysis <input type="checkbox"/><br>Angiogram <input type="checkbox"/><br>Angioplasty <input type="checkbox"/><br>Bypass surgery <input type="checkbox"/><br>Brachytherapy <input type="checkbox"/><br>Pacemaker <input type="checkbox"/><br>Heart transplant <input type="checkbox"/><br>Amputation <input type="checkbox"/><br>Echocardiography <input type="checkbox"/><br>Neuro-imaging <input type="checkbox"/><br>Dialysis <input type="checkbox"/><br>Kidney-transplant <input type="checkbox"/><br>For observation <input type="checkbox"/><br>Other procedure <input type="checkbox"/><br>Specify _____ | Medicines <input type="checkbox"/><br>Thrombolysis <input type="checkbox"/><br>Angiogram <input type="checkbox"/><br>Angioplasty <input type="checkbox"/><br>Bypass surgery <input type="checkbox"/><br>Brachytherapy <input type="checkbox"/><br>Pacemaker <input type="checkbox"/><br>Heart transplant <input type="checkbox"/><br>Amputation <input type="checkbox"/><br>Echocardiography <input type="checkbox"/><br>Neuro-imaging <input type="checkbox"/><br>Dialysis <input type="checkbox"/><br>Kidney-transplant <input type="checkbox"/><br>For observation <input type="checkbox"/><br>Other procedure <input type="checkbox"/><br>Specify _____ | Medicines <input type="checkbox"/><br>Thrombolysis <input type="checkbox"/><br>Angiogram <input type="checkbox"/><br>Angioplasty <input type="checkbox"/><br>Bypass surgery <input type="checkbox"/><br>Brachytherapy <input type="checkbox"/><br>Pacemaker <input type="checkbox"/><br>Heart transplant <input type="checkbox"/><br>Amputation <input type="checkbox"/><br>Echocardiography <input type="checkbox"/><br>Neuro-imaging <input type="checkbox"/><br>Dialysis <input type="checkbox"/><br>Kidney-transplant <input type="checkbox"/><br>For observation <input type="checkbox"/><br>Other procedure <input type="checkbox"/><br>Specify _____ |
| 6  | Total amount spent on treatment (hospitalisation expenses + medicines purchased during the stay)                                                                     | Rs _____                                                                                                                                                                                                                                                                                                                                                                                                                                                                                                                                                                                                                                                    | Rs _____                                                                                                                                                                                                                                                                                                                                                                                                                                                                                                                                                                                                                                                    | Rs _____                                                                                                                                                                                                                                                                                                                                                                                                                                                                                                                                                                                                                                                    |
| 7  | Number of days attendant stayed with you in the hospital                                                                                                             | Days <input type="text"/> <input type="text"/>                                                                                                                                                                                                                                                                                                                                                                                                                                                                                                                                                                                                              | Days <input type="text"/> <input type="text"/>                                                                                                                                                                                                                                                                                                                                                                                                                                                                                                                                                                                                              | Days <input type="text"/> <input type="text"/>                                                                                                                                                                                                                                                                                                                                                                                                                                                                                                                                                                                                              |
| 8  | Cost of attendant's stay (include food accommodation and travel)                                                                                                     | Rs _____                                                                                                                                                                                                                                                                                                                                                                                                                                                                                                                                                                                                                                                    | Rs _____                                                                                                                                                                                                                                                                                                                                                                                                                                                                                                                                                                                                                                                    | Rs _____                                                                                                                                                                                                                                                                                                                                                                                                                                                                                                                                                                                                                                                    |
| 9  | Distance from home to hospital?                                                                                                                                      | Kms <input type="text"/> <input type="text"/> <input type="text"/>                                                                                                                                                                                                                                                                                                                                                                                                                                                                                                                                                                                          | Kms <input type="text"/> <input type="text"/> <input type="text"/>                                                                                                                                                                                                                                                                                                                                                                                                                                                                                                                                                                                          | Kms <input type="text"/> <input type="text"/> <input type="text"/>                                                                                                                                                                                                                                                                                                                                                                                                                                                                                                                                                                                          |
| 10 | Cost of travel from home to hospital (excluding ambulance cost, if any)                                                                                              | Rs _____                                                                                                                                                                                                                                                                                                                                                                                                                                                                                                                                                                                                                                                    | Rs _____                                                                                                                                                                                                                                                                                                                                                                                                                                                                                                                                                                                                                                                    | Rs _____                                                                                                                                                                                                                                                                                                                                                                                                                                                                                                                                                                                                                                                    |

|    |                                                                                                               |                                                                                                                                                                                                                                                                                                                                                                                                                     |                                                                                                                                                                                                                                                                                                                                                                                                                     |                                                                                                                                                                                                                                                                                                                                                                                                                     |
|----|---------------------------------------------------------------------------------------------------------------|---------------------------------------------------------------------------------------------------------------------------------------------------------------------------------------------------------------------------------------------------------------------------------------------------------------------------------------------------------------------------------------------------------------------|---------------------------------------------------------------------------------------------------------------------------------------------------------------------------------------------------------------------------------------------------------------------------------------------------------------------------------------------------------------------------------------------------------------------|---------------------------------------------------------------------------------------------------------------------------------------------------------------------------------------------------------------------------------------------------------------------------------------------------------------------------------------------------------------------------------------------------------------------|
| 11 | What type of medical insurance do you have?<br><br><b>[Yes=1; No=2]</b>                                       | Free medical treatment <input type="checkbox"/><br>Commercial Insurance <input type="checkbox"/><br>None <input type="checkbox"/><br>Self-pay <input type="checkbox"/><br>Other <input type="checkbox"/><br>(_____) <input type="checkbox"/><br>Specify                                                                                                                                                             | Free medical treatment <input type="checkbox"/><br>Commercial Insurance <input type="checkbox"/><br>None <input type="checkbox"/><br>Self-pay <input type="checkbox"/><br>Other <input type="checkbox"/><br>(_____) <input type="checkbox"/><br>Specify                                                                                                                                                             | Free medical treatment <input type="checkbox"/><br>Commercial Insurance <input type="checkbox"/><br>None <input type="checkbox"/><br>Self-pay <input type="checkbox"/><br>Other <input type="checkbox"/><br>(_____) <input type="checkbox"/><br>Specify                                                                                                                                                             |
| 12 | Amount reimbursed from health insurance, if any?                                                              | Rs _____                                                                                                                                                                                                                                                                                                                                                                                                            | Rs _____                                                                                                                                                                                                                                                                                                                                                                                                            | Rs _____                                                                                                                                                                                                                                                                                                                                                                                                            |
| 13 | How do you pay for your hospitalisation costs?<br><br><b>[Yes=1; No=2]</b>                                    | Own saving <input type="checkbox"/><br>Family members paid <input type="checkbox"/><br>Employer paid <input type="checkbox"/><br>Borrowed from friends, relatives, employer <input type="checkbox"/><br>Borrowed from bank <input type="checkbox"/><br>Sold house, land, or other assets <input type="checkbox"/><br>Health insurance <input type="checkbox"/><br>Other <input type="checkbox"/><br>(Specify _____) | Own saving <input type="checkbox"/><br>Family members paid <input type="checkbox"/><br>Employer paid <input type="checkbox"/><br>Borrowed from friends, relatives, employer <input type="checkbox"/><br>Borrowed from bank <input type="checkbox"/><br>Sold house, land, or other assets <input type="checkbox"/><br>Health insurance <input type="checkbox"/><br>Other <input type="checkbox"/><br>(Specify _____) | Own saving <input type="checkbox"/><br>Family members paid <input type="checkbox"/><br>Employer paid <input type="checkbox"/><br>Borrowed from friends, relatives, employer <input type="checkbox"/><br>Borrowed from bank <input type="checkbox"/><br>Sold house, land, or other assets <input type="checkbox"/><br>Health insurance <input type="checkbox"/><br>Other <input type="checkbox"/><br>(Specify _____) |
| 14 | Proportion of money in percentage (%) did you spent from the above mentioned source for your hospitalisation? | Own savings _____ %<br>Family members paid _____ %<br>Employer paid _____ %<br>Borrowed from friends, relatives, employer _____ %<br>Borrowed from bank _____ %<br>Sold house, land, or other assets _____ %<br>Health insurance _____ %<br>Other _____ %<br>(Specify _____)                                                                                                                                        | Own savings _____ %<br>Family members paid _____ %<br>Employer paid _____ %<br>Borrowed from friends, relatives, employer _____ %<br>Borrowed from bank _____ %<br>Sold house, land, or other assets _____ %<br>Health insurance _____ %<br>Other _____ %<br>(Specify _____)                                                                                                                                        | Own savings _____ %<br>Family members paid _____ %<br>Employer paid _____ %<br>Borrowed from friends, relatives, employer _____ %<br>Borrowed from bank _____ %<br>Sold house, land, or other assets _____ %<br>Health insurance _____ %<br>Other _____ %<br>(Specify _____)                                                                                                                                        |

15. Time interview ended:

  :    
 HR MIN

## कार्स: सर्विलेस स्टडी

साक्षात्कारकर्ता के लिए निर्देश: क्या प्रतिभागी ने सूचना सहमति प्रपत्र पर हस्ताक्षर कर दिए हैं? तब तक आगे न बढ़ें जब तक सहमति पत्र पर हस्ताक्षर न हो जाए।

|                                                                         |                                        |                                       |                      |
|-------------------------------------------------------------------------|----------------------------------------|---------------------------------------|----------------------|
| परिवार ID                                                               | <input type="text"/>                   | प्रतिभागी ID                          | <input type="text"/> |
| CEB कोड                                                                 | <input type="text"/>                   | साक्षात्कारकर्ता ID                   | <input type="text"/> |
| साक्षात्कार की तिथि:                                                    | <input type="text"/><br>DD/ MM/ YY     | साक्षात्कार शुरू करने का समय [Hr:min] |                      |
| <b>SECTION – 1: DEMOGRAPHIC, SOCIO-ECONOMIC AND RESIDENTIAL DETAILS</b> |                                        |                                       |                      |
| 1. प्रतिभागी का नाम:                                                    |                                        |                                       |                      |
| प्रथम नाम:                                                              |                                        |                                       |                      |
| मध्य नाम:                                                               |                                        |                                       |                      |
| उपनाम:                                                                  |                                        |                                       |                      |
| 2. Father's/Spouse's name:                                              |                                        |                                       |                      |
| प्रथम नाम:                                                              |                                        |                                       |                      |
| मध्य नाम:                                                               |                                        |                                       |                      |
| उपनाम:                                                                  |                                        |                                       |                      |
| 3. पता/विवरण                                                            |                                        |                                       |                      |
| गली:                                                                    |                                        |                                       |                      |
| जिला:                                                                   |                                        |                                       |                      |
| राज्य:                                                                  |                                        |                                       |                      |
| पिन कोड:                                                                |                                        |                                       |                      |
| 5. टेलीफोन न.                                                           |                                        |                                       |                      |
| निवास:                                                                  |                                        |                                       |                      |
| कार्यालय:                                                               |                                        |                                       |                      |
| मोबाइल:                                                                 |                                        |                                       |                      |
| 6. ई-मेल ID                                                             | (1)                                    |                                       |                      |
|                                                                         | (2)                                    |                                       |                      |
| 7. जन्म स्थान:                                                          |                                        |                                       |                      |
| जिला:                                                                   |                                        |                                       |                      |
| राज्य:                                                                  |                                        |                                       |                      |
| 8. आयु (पूर्ण वर्षों में)                                               | <input type="text"/>                   |                                       |                      |
| 9. जल्म तिथि: (यदि उपलब्ध है)                                           | <input type="text"/><br>DD / MM / YYYY |                                       |                      |

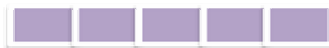

|                                                          |                                                                                                                                                                       |                                                           |
|----------------------------------------------------------|-----------------------------------------------------------------------------------------------------------------------------------------------------------------------|-----------------------------------------------------------|
| 10. लिंग                                                 | पुरुष: 1<br>स्त्री: 2<br>लिंग परिवर्तन 3                                                                                                                              | <input type="checkbox"/>                                  |
| 11. वैवाहिक स्थिति:                                      | अविवाहित 1<br>विवाहित 2<br>विधवा/विधुर 3<br>अलग/तलाकशुदा 4<br>अन्य 5                                                                                                  | <input type="checkbox"/><br>यदि अन्य (विवरण दें)<br><hr/> |
| 12. आपकी मात्र भाषा क्या है?                             | असामी 1 मलयालम 10<br>बालोची 2 मराठी 11<br>बंगाली 3 पंजाबी 14<br>गुजराती 4 सिंधी 15<br>हिन्दी 5 तेलगु 16<br>कन्नड 7 तामिल 17<br>कश्मीरी 8 उर्दू 18<br>मैथिली 9 अन्य 19 | <input type="checkbox"/><br>यदि अन्य (विवरण दें)<br><hr/> |
| 13. आप किस धर्म को मानते हैं? (Optional)                 | हिन्दु 1<br>मुस्लिम 2<br>सिक्ख 3<br>ईसाई 4<br>जैन 5<br>बौध 6<br>कोई धर्म नहीं 7<br>अन्य (विवरण दें) 8<br>कोई उत्तर नहीं 9                                             | <input type="checkbox"/><br>यदि अन्य (विवरण दें)<br><hr/> |
| 14. आप किसी जाति या जनजाति से संबंध रखते हैं? (Optional) | हाँ 1<br>नहीं 2<br>जानते नहीं 3<br>उत्तर नहीं देना चाहते 4<br>लागू नहीं 5                                                                                             | <input type="checkbox"/>                                  |
| 14.a. यदि हाँ<br>आपकी जाति/जनजाति क्या है? (Optional)    | अनुसूचित जाति 1<br>अनुसूचित जनजाति 2<br>अन्य पिछड़े वर्ग 3<br>सर्वाधिक पिछड़े वर्ग 4<br>अन्य 5                                                                        | <input type="checkbox"/><br>यदि अन्य (विवरण दें)<br><hr/> |
| 15. आपने औपचारिक शिक्षा में कुल कितने वर्ष बिताए?*       |                                                                                                                                                                       | <input type="checkbox"/><br>वर्ष                          |

\* कुल वर्ष जो प्रतिभागी ने किसी शिक्षा संस्थान में बिताए। (विद्यालय, कॉलेज, धार्मिक विद्यालय आदि)



|                                                                                                                                                                                                                                                                    |                                                                              |   |                                                                                                                                                        |
|--------------------------------------------------------------------------------------------------------------------------------------------------------------------------------------------------------------------------------------------------------------------|------------------------------------------------------------------------------|---|--------------------------------------------------------------------------------------------------------------------------------------------------------|
| <p>16. शिक्षा का स्तर (उच्चतम डिग्री प्राप्त)</p> <p>* एक मनुष्य जो बिना किसी औपचारिक या निम्न शिक्षा के कोई भी भाषा समझ के साथ पढ़ और लिख सकता है।</p> <p>** एक मनुष्य जो न पढ़ सकता है न ही लिख सकता है या केवल पढ़ सकता है किंतु कोई भी भाषा लिख नहीं सकता।</p> | Professional degree/post graduate                                            | 1 | <br>यदि अन्य (विवरण दें)<br><hr/> <hr/>                             |
|                                                                                                                                                                                                                                                                    | Graduate<br>(B.A/B.Sc/B.Com/Diploma)                                         | 2 |                                                                                                                                                        |
|                                                                                                                                                                                                                                                                    | Secondary School / Intermediary<br>(ITI course, class XII/X or Intermediate) | 3 |                                                                                                                                                        |
|                                                                                                                                                                                                                                                                    | High school (class V to IX)                                                  | 4 |                                                                                                                                                        |
|                                                                                                                                                                                                                                                                    | Primary School (upto Class IV)                                               | 5 |                                                                                                                                                        |
|                                                                                                                                                                                                                                                                    | *Literate, no formal education                                               | 6 |                                                                                                                                                        |
|                                                                                                                                                                                                                                                                    | **Illiterate                                                                 | 7 |                                                                                                                                                        |
|                                                                                                                                                                                                                                                                    | Others                                                                       | 8 |                                                                                                                                                        |
| 17. आपकी व्यवसायिक स्थिति?                                                                                                                                                                                                                                         | कर्मचारी                                                                     | 1 | <br><b>"1" प्र. 17.a</b><br>पर जाएं अन्यथा<br><b>प्र. 8 पर जाएं</b> |
|                                                                                                                                                                                                                                                                    | विद्यार्थी                                                                   | 2 |                                                                                                                                                        |
|                                                                                                                                                                                                                                                                    | गृहणी                                                                        | 3 |                                                                                                                                                        |
|                                                                                                                                                                                                                                                                    | सेवानिवृत्त                                                                  | 4 |                                                                                                                                                        |
|                                                                                                                                                                                                                                                                    | बेरोजगार                                                                     | 5 |                                                                                                                                                        |
| 17.a. यदि "कर्मचारी" हो तो आपका वर्तमान व्यवसाय क्या है?<br>{नीचे दिए गए नजदीकी उपयुक्त व्यवसायिक कोड प्रयोग करें}                                                                                                                                                 |                                                                              |   |                                                                     |
| 18. क्या आप पिछले 10 साल से दूसरे व्यवसाय में थे?                                                                                                                                                                                                                  | हाँ                                                                          | 1 | <br><b>"2" तो प्र. 19 पर जाएं</b>                                  |
|                                                                                                                                                                                                                                                                    | नहीं                                                                         | 2 |                                                                                                                                                        |
| 18.a. यदि "हाँ" व्यवसाय का नाम?<br>{नीचे दिए गए नजदीकी उपयुक्त व्यवसायिक कोड प्रयोग करें}                                                                                                                                                                          |                                                                              |   |                                                                   |
| <b>Coding list for employment (for Q.17.a and Q.18.a)- refer to annexure for definition of skilled, semi-skilled, un-skilled</b>                                                                                                                                   |                                                                              |   |                                                                                                                                                        |
| प्रोफेशनल, बड़ा व्यापार, जमींदार, विश्वविद्यालय अध्यापक, प्रथम श्रेणी के IAS वकील,                                                                                                                                                                                 |                                                                              |   | 1                                                                                                                                                      |
| प्रशिक्षित क्लर्क, मध्यम व्यवसायिक, मध्यम स्तर के किसान, अध्यापक, रखरखाव-प्रभारी, पर्सनल मैनेजर,                                                                                                                                                                   |                                                                              |   | 2                                                                                                                                                      |
| कुशल श्रमिक, लघु व्यवसायिक, छोटे किसान,                                                                                                                                                                                                                            |                                                                              |   | 3                                                                                                                                                      |
| अर्ध कुशल श्रमिक, हाथि, के किसान,                                                                                                                                                                                                                                  |                                                                              |   | 4                                                                                                                                                      |
| रिक्शा चालक, आर्मी जवान, बढ़ई, फिट्टर, अकुशल श्रमिक, भूमिहीन किसान                                                                                                                                                                                                 |                                                                              |   | 5                                                                                                                                                      |

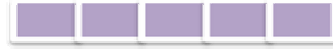

|                                                                                                                                                                                  |                                                                                                                                                                                                                      |                                                                                                                                                                                                                                                                                                                                                                 |
|----------------------------------------------------------------------------------------------------------------------------------------------------------------------------------|----------------------------------------------------------------------------------------------------------------------------------------------------------------------------------------------------------------------|-----------------------------------------------------------------------------------------------------------------------------------------------------------------------------------------------------------------------------------------------------------------------------------------------------------------------------------------------------------------|
| <p>19.आपके परिवार की प्रतिमाह क्या आय है?</p> <p><b>कृपया परिवार में को उन सभी सदस्यों की आय शामिल करे जो सदस्य परिवार में अपनी आय का योगदान देते हैं।</b></p>                   | <p>&lt;3000 1</p> <p>3000-10,000 2</p> <p>10,001-20,000 3</p> <p>20,001-30,000 4</p> <p>30,001-40,000 5</p> <p>40,001-50,000 6</p> <p>&gt;50,000 7</p> <p>उत्तर नहीं देना चाहते 8</p> <p>जानते नहीं 9</p>            | <p><input type="checkbox"/></p>                                                                                                                                                                                                                                                                                                                                 |
| <p>20.क्या आपके पास खाना बनाने के लिए अलग से रसोई है?</p>                                                                                                                        | <p>हाँ 1</p> <p>नहीं 2</p>                                                                                                                                                                                           | <p><input type="checkbox"/></p>                                                                                                                                                                                                                                                                                                                                 |
| <p>21.आप खाना बनाने के लिए कौन सा ईंधन प्रयोग करते हैं?</p> <p><b>अगर आप एक से ज्यादा साधन प्रयोग करते हैं तब जो आप समान्यता जो साधन ज्यादा प्रयोग करते हैं वो लिखें।</b></p>    | <p>कोयला/चारकोल का बना हुआ/ मिट्टी का तेल 1</p> <p>बिजली/एल.पी.जी गैस/ सौर ऊर्जा/स.एन.जी (आई.जी.एल) 2</p> <p>लकड़ी/गोबर 3</p> <p>अन्य 4</p>                                                                          | <p><input type="checkbox"/></p> <p>अन्य, विवरण दें।</p> <hr/>                                                                                                                                                                                                                                                                                                   |
| <p>22.घर मे प्रयोग होने वाले पिने के पानी का साधन क्या है?</p> <p><b>अगर आप एक से ज्यादा साधन प्रयोग करते हैं तब जो आप समान्यता जो साधन ज्यादा प्रयोग करते हैं वो लिखें।</b></p> | <p>सार्वजनिक साधन 1</p> <p>निजी साधन (सहभाजी) 2</p> <p>निजी साधन (स्वयं का) 3</p> <p>बोटल का पानी 4</p> <p>नल का परिष्कृत पानी 5</p> <p>अन्य 6</p>                                                                   | <p>अन्य, विवरण दें।</p> <p><input type="checkbox"/></p> <hr/>                                                                                                                                                                                                                                                                                                   |
| <p>23.आप किस प्रकार का शौचालय सुविधा प्रयोग करते हैं?</p>                                                                                                                        | <p>सार्वजनिक शौचालय 1</p> <p>सहभाजी शौचालय 2</p> <p>निजी शौचालय 3</p> <p>अन्य 4</p>                                                                                                                                  | <p><input type="checkbox"/></p> <p>अन्य, विवरण दें।</p> <hr/>                                                                                                                                                                                                                                                                                                   |
| <p>24.निम्नलिखित में से आपका स्वयं का क्या है?</p> <p><b>[हाँ =1; नहीं =2]</b></p>                                                                                               | <p>a. टेलीविज़न</p> <p>b. रेफ्रिजरेटर</p> <p>c. वाशिंग मशीन</p> <p>d. माइक्रोवेव</p> <p>e. ग्राइंडर</p> <p>f. मोबाइल फोन</p> <p>g. डी.वी.डी प्लेअर</p> <p>h. कम्प्यूटर</p> <p>i. कार</p> <p>j. मोटर साइकल/स्कूटर</p> | <p><input type="checkbox"/></p> |



|                                                                                                                                                       | k. साइकल                                                                                            |                                                                          |
|-------------------------------------------------------------------------------------------------------------------------------------------------------|-----------------------------------------------------------------------------------------------------|--------------------------------------------------------------------------|
| 25. संभवतः क्या आप अपने वर्तमान निवास स्थान को एक या दो वर्ष छोड़कर चले जाएंगे?                                                                       | हाँ<br>नहीं<br>पता नहीं                                                                             | 1<br>2<br>3                                                              |
| 26. यदि आप अपने वर्तमान निवास स्थान को छोड़कर चले जाते हैं तो हम किससे आपका नया पता और टेलीफोन नं. प्राप्त कर सकते हैं?<br><br><b>दो संपर्क चुनिए</b> | पड़ोसी<br>रिश्तेदार<br>दोस्त<br>नियोक्ता<br>किसी सक संपर्क<br>अन्य<br>विवरण दें _____               | 1<br>2<br>3<br>4<br>5<br>6<br><br>1 <sup>st</sup><br><br>2 <sup>nd</sup> |
| 27. प्रथम संपर्क व्यक्ति का नाम<br><br>प्रथम नाम:<br><br>मध्य नाम:<br><br>उपनाम:                                                                      |                                                                                                     |                                                                          |
| 28. प्रथम संपर्क व्यक्ति का पता                                                                                                                       |                                                                                                     |                                                                          |
| 29. प्रथम संपर्क व्यक्ति का फोन नं. (निवास, कार्यालय, मोबाइल)                                                                                         | निवास _____ (एरिया कोड) _____ (नं०)<br>कार्यालय _____ (एरिया कोड) _____ (नं०)<br>मोबाइल _____ (नं०) |                                                                          |
| 30. दूसरे संपर्क व्यक्ति का नाम<br><br>प्रथम नाम:<br><br>मध्य नाम:<br><br>उपनाम:                                                                      |                                                                                                     |                                                                          |
| 31. दूसरे संपर्क व्यक्ति का पता                                                                                                                       |                                                                                                     |                                                                          |
| 32. दूसरे संपर्क व्यक्ति का फोन नं. (निवास, कार्यालय, मोबाइल)                                                                                         | निवास _____ (एरिया कोड) _____ (नं०)<br>कार्यालय _____ (एरिया कोड) _____ (नं०)<br>मोबाइल _____ (नं०) |                                                                          |



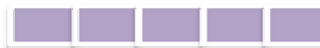
**भाग- 2: तंबाकू और शराब का उपभोग, खान-पान संबंधी आदते, शारीरिक क्रियाशीलता और नींद।**
**PART – A: तंबाकू का प्रयोग**

|                                                                                                                                       |                                                                                                   |                                                                                  |
|---------------------------------------------------------------------------------------------------------------------------------------|---------------------------------------------------------------------------------------------------|----------------------------------------------------------------------------------|
| 1. क्या आपने कभी किसी भी रूप में तंबाकू प्रयोग किया है?                                                                               | हाँ<br>1<br>नहीं<br>2                                                                             | <input type="checkbox"/><br><b>"2" go to Q. 8</b>                                |
| 2. आप किस रूप में तंबाकू का सेवन करते हैं?<br>[हाँ=1; नहीं =2]                                                                        | a. धूम्रपान के रूप में<br>b. चबाने के रूप में<br>c. किसी ओर रूप में (सुघनें, टूथपेस्ट, सुघना आदि) | <input type="checkbox"/><br><input type="checkbox"/><br><input type="checkbox"/> |
| 3. क्या आप अभी भी तंबाकू का सेवन कर रहे हैं?<br>* पिछले 6 महीनों से                                                                   | हाँ<br>1<br>नहीं<br>2                                                                             | <input type="checkbox"/><br><b>"2" go to Q. 5</b>                                |
| 4. यदि हाँ प्रायः कितनी बार?<br>[निरंतर (≥ हफ्ते में एक बार से ज्यादा) – 1; कभी-कभी;<br>(हफ्ते में एक बार से कम) – 2; न-3 ; नहीं – 9] | धूम्रपान के रूप में<br>चबाने के रूप में<br>किसी ओर रूप में                                        | <input type="checkbox"/><br><input type="checkbox"/><br><input type="checkbox"/> |

**5. मात्रा और प्रयोग की अवधि**

| तंबाकू प्रयोग करने के प्रकार  | ब्रांड नाम | प्रयोग करने की अवधि |       | महिने में प्रयोग करने की मात्रा<br>* कितना धूम्रपान किया<br>** कितनी बार धूम्रपान किया<br>*** लगभग कितनी मात्रा (ग्राम में) | यदि आपने निम्नलिखित पदार्थों का सेवन बंद बंद कर दिया है (समय में) महिने/वर्ष जब से सेवन बंद किया है। |       |
|-------------------------------|------------|---------------------|-------|-----------------------------------------------------------------------------------------------------------------------------|------------------------------------------------------------------------------------------------------|-------|
|                               |            | वर्ष                | महिने |                                                                                                                             | वर्ष                                                                                                 | महिने |
| 1. सिगरेट*                    |            |                     |       |                                                                                                                             |                                                                                                      |       |
| 2. बीड़ी*                     |            |                     |       |                                                                                                                             |                                                                                                      |       |
| 3. सिगार*                     |            |                     |       |                                                                                                                             |                                                                                                      |       |
| 4. हुक्का**                   |            |                     |       |                                                                                                                             |                                                                                                      |       |
| 5. चबाने वाला तम्बाकू***      |            |                     |       |                                                                                                                             |                                                                                                      |       |
| 6. पान ज़र्दे के साथ***       |            |                     |       |                                                                                                                             |                                                                                                      |       |
| 7. पान मसाला ज़र्दे के साथ*** |            |                     |       |                                                                                                                             |                                                                                                      |       |
| 8. नसवार**                    |            |                     |       |                                                                                                                             |                                                                                                      |       |
| 9. गुटखा***                   |            |                     |       |                                                                                                                             |                                                                                                      |       |
| 10. अन्य:<br>विवरण दें _____  |            |                     |       |                                                                                                                             |                                                                                                      |       |

|                                                                                                                                                           |                                                                                                                            |                                                 |
|-----------------------------------------------------------------------------------------------------------------------------------------------------------|----------------------------------------------------------------------------------------------------------------------------|-------------------------------------------------|
| 6. जब आपने पहली बार रोज़ाना धूम्रपान करना शुरू किया था तब आपकी उम्र क्या थी?<br><b>[Not applicable - write '99' in the box]</b>                           | <input type="text"/> <input type="text"/> वर्ष                                                                             |                                                 |
| 7. जब आपने पहली बार रोज़ाना धूम्रपान रहित पदार्थों का सेवन शुरू किया था तब आपकी उम्र क्या थी?<br><b>[Not applicable - write '99' in the box]</b>          | <input type="text"/> <input type="text"/> वर्ष                                                                             |                                                 |
| 8. क्या आप अन्य व्यक्तियों के द्वारा तम्बाकू धूम्रपान प्रयोग करने से रोज़ाना घर या कार्य क्षेत्र में प्रभावित होते हैं*?<br>* कम से कम हफ़्ते में एक दिन। | हाँ 1<br>नहीं 2                                                                                                            | <input type="text"/><br><b>"2" go to PART B</b> |
| 9. यदि हाँ<br>हफ़्ते में कितने दिन*?<br>दिन के दौरान कितना समय*?                                                                                          | <input type="text"/><br><input type="text"/> <input type="text"/> : <input type="text"/> <input type="text"/><br>घंटे मिनट |                                                 |

**PART - B: शराब (मदिरा) का सेवन**

|                                                                             |                                                                                                                                                                                                                                                                               |                                                   |
|-----------------------------------------------------------------------------|-------------------------------------------------------------------------------------------------------------------------------------------------------------------------------------------------------------------------------------------------------------------------------|---------------------------------------------------|
| 1. क्या आपने कभी शराब का सेवन किया है?                                      | हाँ 1<br>नहीं 2                                                                                                                                                                                                                                                               | <input type="text"/><br><b>"2" PART C पर जाएं</b> |
| 2. आप शराब का सेवन कितनी बार करते हैं?<br><b>*कभी-कभी हफ़्ते में एक बार</b> | वर्तमान समय में रोज़ाना शराब का सेवन करते हैं 1<br>वर्तमान समय में कभी-कभी (अवसर पर) शराब का सेवन करते हैं * 2<br>पहले शराब का सेवन करते थे (6 महीने से ज़्यादा समय पहले) 3<br>हाल ही में शराब का सेवन बंद कर दिया (6 महीने से कम समय पहले) 4<br>शराब का सेवन कभी नहीं किया 5 | <input type="text"/><br><b>"5" PART C पर जाएं</b> |

**3. शराब का सेवन करने वालों का वर्तमान व भूतपूर्व विवरण**

| प्रयोग की गई शराब के प्रकार                      | प्रयोग करने की अवधि |       | आवृत्ति प्रति सप्ताह | मात्र**<br>ml/पैग में (अवसर में) | यदि बंद कर दिया तो कितने समय से )वर्षों में |       |
|--------------------------------------------------|---------------------|-------|----------------------|----------------------------------|---------------------------------------------|-------|
|                                                  | वर्ष                | महिने |                      |                                  | वर्ष                                        | महिने |
| a) स्थानीय शराब जैसे-देसी, अरक, टोडी आदि         |                     |       |                      |                                  |                                             |       |
| b) शराब जैसे- विहस्क्री, रम, बराण्डी, जिन, वोडका |                     |       |                      |                                  |                                             |       |
| c) बीयर                                          |                     |       |                      |                                  |                                             |       |
| d) वाईन                                          |                     |       |                      |                                  |                                             |       |

## \*\* रूपांतरण

1 small peg = 30 ml; 1 large peg = 60 ml; 1 extra large peg = 90 ml

1 glass of beer = approx. 325 ml

1 glass of wine = 100 ml

**कृपया कुल खपत जानने के लिए साधारण नाप तोल का साहारा ले! (प्रत्येक अवसर पर मि.ली. में)****PART - C: शारिरिक क्रियाशीलता (संक्षिप्त अंतर्राष्ट्रीय शारिरिक क्रियाशीलता प्रश्नोत्तर)**

हम उन विभिन्न क्रियाओं को जानने के इच्छुक हैं जिन्हें लोग अपनी रोज-मर्रा की जिंदगी में अपने काम में शामिल करते हैं। मैं आपसे एक हफ्ते में बिताए गए ऐसे समय के बारे में पूछने जा रहा/रही हूँ जिसमें आप सामान्य रूप से क्रियाशील हों। यदि आप अपने आपको क्रियाशील मनुष्य नहीं मानते तो कृपया इन प्रश्नों का उत्तर दें। ऐसी क्रियाओं पर विचार करें जिन्हें आप अपने कार्य क्षेत्र, एक स्थान से दूसरे स्थान पर आने-जाने और खाली समय में मनोरंजन या शरीर को चुस्त रखने के लिए करते हैं।

अब आप पिछले 7 दिनों में अपने काम के दौरान की गई प्रबल मेहनत वाली शारिरिक क्रिया के बारे में विचार करेंगे। प्रबल शारिरिक क्रिया का मतलब यह है कि जिसमें श्वास सामान्य कि अपेक्षा अधिक तेज़ हो जाती है जैसे कि भारी वज़न उठाना, खुदाई करना, ऐअरोबिक्स या तेज़ साईकल चलाना। केवल उन्हीं शारिरिक क्रियाओं के बारे में विचार करें जो कम से कम 10 मिनट लगातार की हो।

|                                                                                                                                                                                                                                                                                                                                                                                                                                      |                                                                                                                                 |                                                                               |
|--------------------------------------------------------------------------------------------------------------------------------------------------------------------------------------------------------------------------------------------------------------------------------------------------------------------------------------------------------------------------------------------------------------------------------------|---------------------------------------------------------------------------------------------------------------------------------|-------------------------------------------------------------------------------|
| 1. सामान्य 7 दिनों में आपने कितने दिन प्रबल मेहनत वाली शारिरिक क्रिया की है?                                                                                                                                                                                                                                                                                                                                                         | दिन प्रति सप्ताह =1<br>मना करना (Q.3 पर जाएं) = 2<br>पता नहीं/पक्का पता नहीं (3 पर जाएं) = 3<br>कोई शारिरिक क्रिया नहीं करते= 4 | <input type="text"/> <input type="text"/><br><input type="text"/>             |
| 2. जिन दिनों आप भारी शारिरिक क्रिया करते हैं उन दिनों में से एक सामान्य दिन में आप कितना लगातार 10 मिनट भारी शारीरिक क्रिया करते हैं?                                                                                                                                                                                                                                                                                                | घंटे/मिनट प्रति दिन = 1<br>मना करना (Q.2a पर जाएं) = 2<br>पता नहीं/पक्का पता नहीं (2a पर जाएं)=3                                | <input type="text"/> : <input type="text"/><br>HR MIN<br><input type="text"/> |
| 2a. साक्षात्कारकर्ता की जांच: यदि प्रतिवादी अपने बिताए गए समय के दिन-प्रतिदिन परिवर्तित होने के कारण उत्तर नहीं दे सकता है, कहिए, "मैं आपके द्वारा उन दिनों में से एक सामान्य दिन में से प्रबल मेहनत वाली शारिरिक क्रिया को जानने का इच्छुक हूँ जो आप औसतन करते हैं। क्या आप मुझे यह बता सकते हैं कि आपने सामान्य 7 दिनों में कुल कितना समय प्रबल शारिरिक क्रिया की है?"                                                             | घंटे/मिनट प्रति दिन = 1<br>मना करना = 2<br>पता नहीं/पक्का पता नहीं = 3                                                          | <input type="text"/> : <input type="text"/><br>HR MIN<br><input type="text"/> |
| <b>अब आप मध्यम मेहनत वाली शारिरिक क्रियाओं के बारे में विचार किजिए जो आपने पिछले सामान्य 7 दिनों में की है। मध्यम मेहनत वाली शारिरिक क्रिया आपकी श्वास की गति को सामान्य कि अपेक्षा कुछ-कुछ तेज कर देती है। इन क्रियाओं में चलने वाली क्रियाओं को शामिल नहीं किजिए फिर से केवल उन ही क्रियाओं को शामिल नहीं किजिए फिर से केवल उन ही 10 मिनट तक करते हैं।</b>                                                                         |                                                                                                                                 |                                                                               |
| 3. सामान्य 7 दिनों के दौरान आपने कितने दिन कम से कम 10 मिनट लगातार मध्यम मेहनत वाली शारिरिक क्रिया की है?<br>जैसे : बोज़ उठाना, धीरे-धीरे साईकल चलाना, टेनिस, बैडमिंटन, क्रिकेट, हाथों से कपड़े धोना, झाड़ू मारना, बागबानी करना, अपने 3 साल से कम उम्र के बच्चे की देखभाल करना, कार, मोटर कार और स्कूटर की सफाई करना, बज़ार से सब्ज़ियाँ और किराने का सामान पैदल घर तक लाना, सीढ़ियाँ चढ़ना (3 फ्लोर या ज़्यादा) पत्थर पर चटनी पीसना | घंटे/मिनट प्रति दिन = 1<br>मना करना (Q.5 पर जाएं) = 2<br>पता नहीं/पक्का पता नहीं (5 पर जाएं) = 3                                | <input type="text"/> <input type="text"/><br><input type="text"/>             |

|                                                                                                                                                                                                                                                                                                                                                                                                                                                                                  |                                                                                                                                            |                                                                                        |
|----------------------------------------------------------------------------------------------------------------------------------------------------------------------------------------------------------------------------------------------------------------------------------------------------------------------------------------------------------------------------------------------------------------------------------------------------------------------------------|--------------------------------------------------------------------------------------------------------------------------------------------|----------------------------------------------------------------------------------------|
| <p>4. जिन दिनों आप मध्यम मेहनत वाली शारिरिक क्रिया करते हैं उन दिनों में से एक सामान्य दिन में आप कितने समय लगातार 10 मिनट तक मध्यम मेहनत वाली शारिरिक क्रिया करते हैं?</p>                                                                                                                                                                                                                                                                                                      | <p>घंटे/मिनट प्रति दिन = 1<br/>मना करना (Q.4a पर जाएं) = 2<br/>पता नहीं/पक्का पता नहीं (4a पर जाएं) = 3</p>                                | <p><input type="text"/> : <input type="text"/><br/>HR MIN<br/><input type="text"/></p> |
| <p>4a. साक्षात्कारकर्ता की जांच: यदि प्रतिवादी अपने बिताए गए समय के दिन-प्रतिदिन परिवर्तित होने के कारण या अलग-अलग कार्यों में व्यस्त होने के कारण उत्तर नहीं दे सकता है, कहिए, "मैं आपके द्वारा उन दिनों में से एक सामान्य दिन में से मध्यम मेहनत वाली शारिरिक क्रिया को जानने का इच्छुक हूँ जो आप औसतन करते हैं। क्या आप मुझे यह बता सकते हैं कि आपने सामान्य 7 दिनों में कुल कितना समय मध्यम शारिरिक क्रिया की है?"</p>                                                       | <p>घंटे/मिनट प्रति दिन = 1<br/>मना करना = 2<br/>पता नहीं/पक्का पता नहीं = 3</p>                                                            | <p><input type="text"/> : <input type="text"/><br/>HR MIN<br/><input type="text"/></p> |
| <p><b>अब आप उस समय के बारे में विचार करें किजिए जो आपने पिछले सामान्य 7 दिनों में चलने में बिताया है। इसमें कार्य स्थल से घर तक आना-जाना, यात्रा के लिए आना-जाना शामिल है। इसमें किसी भी तरह चलने वाली क्रिया शामिल है जिसे आप अकेले घूमकर, खेलकर, व्यायाम या फुर्सत में करते हैं जैसे: कम से कम लगातार 10 मिनट तक बस स्टॉप, कार्य स्थल और बाज़ार चलकर जाते हैं।</b></p>                                                                                                         |                                                                                                                                            |                                                                                        |
| <p>5. सामान्य 7 दिनों के दौरान आप कितने दिन कम से कम 10 मिनट तक चले हैं?</p>                                                                                                                                                                                                                                                                                                                                                                                                     | <p>दिन प्रति सप्ताह=1<br/>मना करना (Q.7 पर जाएं) = 2<br/>पता नहीं/पक्का पता नहीं (Q.7 पर जाएं) = 3</p>                                     | <p><input type="text"/><br/><input type="text"/></p>                                   |
| <p>6. जिन दिनों आप सामान्य चलते हैं उन दिनों में से एक सामान्य दिन में आप कितना समय चलने में बिताते हैं?</p>                                                                                                                                                                                                                                                                                                                                                                     | <p>घंटे/मिनट प्रति दिन (Q.7 पर जाएं) =1<br/>मना करना (Q.6a पर जाएं) = 2<br/>पता नहीं/पक्का पता नहीं (6a पर जाएं) = 3</p>                   | <p><input type="text"/> : <input type="text"/><br/>HR MIN<br/><input type="text"/></p> |
| <p>6a. साक्षात्कारकर्ता की जांच: यदि प्रतिवादी अपने बिताए गए समय के दिन-प्रतिदिन परिवर्तित होने के कारण उत्तर नहीं दे सकता है, कहिए, "मैं आपके द्वारा उन दिनों में से एक सामान्य दिन में से चलने वाली क्रिया को जानने का इच्छुक हूँ जो आप औसतन करते हैं। क्या आप मुझे यह बता सकते हैं कि आपने सामान्य 7 दिनों में कुल कितना समय चलने वाली क्रिया की है?"</p>                                                                                                                     | <p>घंटे/मिनट प्रति दिन = 1<br/>मना करना = 2<br/>पता नहीं/पक्का पता नहीं = 3</p>                                                            | <p><input type="text"/> : <input type="text"/><br/>HR MIN<br/><input type="text"/></p> |
| <p><b>अब आप पिछले सप्ताह 7 दिनों के दौरान बैठकर बिताए गए समय के बारे में बताएं। इसमें आप कार्य स्थल पर, घर पर, पाठ्यक्रम और खाली समय में बैठने वाले समय को भी शामिल कर सकते हैं। इसमें डे चलने में बिताया है। इसमें कार्य स्थल से घर तक आना-जाना, यात्रा के लिए आना-जाना शामिल है। इसमें किसी भी तरह चलने वाली क्रिया शामिल है जिसे आप अकेले घूमकर, खेलकर, व्यायाम या फुर्सत में करते हैं जैसे: कम से कम लगातार 10 मिनट तक बस स्टॉप, कार्य स्थल और बाज़ार चलकर जाते हैं।</b></p> |                                                                                                                                            |                                                                                        |
| <p>7. सामान्य 7 दिनों के दौरान किसी एक दिन आमतौर पर आप कितना समय बैठकर बिताते हैं? इसमें लेटे हुए (जागे रहना) और इसी तरह बैठे हुए समय बिताए को भी शामिल करें। (*रात को सोने को शामिल न करें)</p>                                                                                                                                                                                                                                                                                 | <p>घंटे/मिनट प्रति कार्य दिवस [प्र. 8 (1) पर जाएं]<br/>मना करने पर (प्र. 7 a पर जाएं)=2<br/>नहीं जानते/पक्का नहीं (प्र. 7 a पर जाएं)=3</p> | <p><input type="text"/> : <input type="text"/><br/>HR MIN<br/><input type="text"/></p> |

|                                                                                                                                                                                                                                                                                                                                                               |                                                                          |                                                                                        |
|---------------------------------------------------------------------------------------------------------------------------------------------------------------------------------------------------------------------------------------------------------------------------------------------------------------------------------------------------------------|--------------------------------------------------------------------------|----------------------------------------------------------------------------------------|
| <p>7a. साक्षात्कारकर्ता की जांच: यदि प्रतिवादी अपने बिताए गए समय के दिन-प्रतिदिन परिवर्तित होने के कारण उत्तर नहीं दे सकता है, कहिए, "मैं आपके द्वारा उन दिनों में से एक सामान्य दिन में से बैठे हुए बिताए गए समय को जानने का इच्छुक हूँ जो आप औसतन करते हैं। क्या आप मुझे यह बता सकते हैं कि आपने सामान्य 7 दिनों में कुल कितना समय बैठे हुए बिताया है?"</p> | <p>घंटे/मिनट (बुधवार में)<br/>मना करना=2<br/>नहीं जानते/पक्का नहीं=3</p> | <p><input type="text"/> : <input type="text"/><br/>HR MIN<br/><input type="text"/></p> |
|---------------------------------------------------------------------------------------------------------------------------------------------------------------------------------------------------------------------------------------------------------------------------------------------------------------------------------------------------------------|--------------------------------------------------------------------------|----------------------------------------------------------------------------------------|

8. Additional comments

**PART - D: सोए हुए हृदय का चिकित्सीय अध्ययन**

|                                                                                                                                                                                                                                                                                                                                                                                                                                                                                                                                                                                                                                                                                                                                                                                                                                                               |                                                                                                                                                                                        |                                                             |
|---------------------------------------------------------------------------------------------------------------------------------------------------------------------------------------------------------------------------------------------------------------------------------------------------------------------------------------------------------------------------------------------------------------------------------------------------------------------------------------------------------------------------------------------------------------------------------------------------------------------------------------------------------------------------------------------------------------------------------------------------------------------------------------------------------------------------------------------------------------|----------------------------------------------------------------------------------------------------------------------------------------------------------------------------------------|-------------------------------------------------------------|
| <p>1. सामान्यतः आप रात को कितने घंटे सोते हैं?<br/><br/>आपकी रात को सोने की मुख्य समयावधि?</p>                                                                                                                                                                                                                                                                                                                                                                                                                                                                                                                                                                                                                                                                                                                                                                | <p>कार्य दिवस पर<br/><input type="text"/><br/>No. of hrs</p>                                                                                                                           | <p>सप्ताहांत पर<br/><input type="text"/><br/>No. of hrs</p> |
| <p>2. एक सामान्य हफ्ते के दौरान आप 5 मिनट के लिए या उससे ज्यादा कितनी बार ऊँघते हैं? ("00" लिखें यदि आप एक भी बार नहीं ऊँघते)</p>                                                                                                                                                                                                                                                                                                                                                                                                                                                                                                                                                                                                                                                                                                                             | <p><input type="text"/><br/>No. of times</p>                                                                                                                                           |                                                             |
| <p>3. कार्यदिवस, सप्ताहांत (सप्ताह का अंतिम दिन), कितने घंटे निम्नलिखित में से प्रत्येक के लिए प्रायः आपने कितना अनुभव किया है। कृपया संकेत करें। (नीचे दिए गए कोड से उल्लेख करें)<br/>[कभी नहीं=1; कभी-कभार (1/महीना या कम)=2; कभी-कभी (2-4/महीनें)=3; प्रायः (5-15/महीनें)=4; अधिकतर हमेशा (16-30/महीनें)=5]</p> <p>A. क्या सोते हुए परेशानी होती है <input type="checkbox"/></p> <p>B. रात्री के दौरान जाग लाना और फिर से नींद आने में परेशानी होना <input type="checkbox"/></p> <p>C. सुबह-सुबह जाग जाना और फिर से सोने में असमर्थ होना। <input type="checkbox"/></p> <p>D. दिन के दौरान अशांती (बैचानी) महसूस करना इसकी परवाह किये बिना कि आपने कितनी नींद ली है। <input type="checkbox"/></p> <p>E. प्रयाप्त रूप से नींद नहीं लेते। <input type="checkbox"/></p> <p>F. सोने के लिए नींद की गोली या अन्य कोई दवाई लेते हैं। <input type="checkbox"/></p> |                                                                                                                                                                                        |                                                             |
| <p><b>प्र. 6-10 नींद के दौरान खरटे लेने और श्वास लेने के विषय में है। इन प्रश्नों का उत्तर देते समय कृपया गौर किजिए कि आप अपने बारे में क्या जानते हैं।</b></p>                                                                                                                                                                                                                                                                                                                                                                                                                                                                                                                                                                                                                                                                                               |                                                                                                                                                                                        |                                                             |
| <p>4. क्या आपने कभी खरटे लिए हैं? (आजकल या पहले किसी समय)?</p>                                                                                                                                                                                                                                                                                                                                                                                                                                                                                                                                                                                                                                                                                                                                                                                                | <p>हाँ 1<br/>नहीं 2<br/>पता नहीं 8</p>                                                                                                                                                 | <p><input type="text"/><br/>"2", "8" go to Q.7</p>          |
| <p>5. प्रायः आप कितना खरटे लेते हैं?</p>                                                                                                                                                                                                                                                                                                                                                                                                                                                                                                                                                                                                                                                                                                                                                                                                                      | <p>अब खरटे नहीं लेते 0<br/>कभी-कभार (&lt;1 रात/सप्ताह) 1<br/>कभी-कभी (1-2 रातें/सप्ताह) 2<br/>बार-बार (3-5 रातें/सप्ताह) 3<br/>हमेशा या अधिकतर (6-7 रातें/सप्ताह) 4<br/>पता नहीं 8</p> | <p><input type="text"/><br/>"0" go to Q.7</p>               |

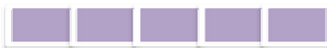

|                                                                                                                                        |                                                                                                                                                                                                                                                        |                                                                                                                                             |
|----------------------------------------------------------------------------------------------------------------------------------------|--------------------------------------------------------------------------------------------------------------------------------------------------------------------------------------------------------------------------------------------------------|---------------------------------------------------------------------------------------------------------------------------------------------|
| 6. आप कितनी ज़ोर से खर्राटे लेते हैं?                                                                                                  | ज़ोर से ज़्यादा सांस लेने की अपेक्षा थोड़ा ज़्यादा खर्राटे लेते हैं? 1<br>लगभग इतनी आवाज़ से जितना बड़बड़ाते या बातें करते हैं? 2<br>बातें करने की अपेक्षा ज़्यादा जोर से इतनी ज़ोर से लेते हैं कि बंद दरवाज़े के बाहर सुनाई देता है 4<br>जानते नहीं 8 |                                                          |
| 7. क्या आपने कभी ध्यान दिया है या घर वालों ने आपको बताया है कि सोने के दौरान आप किसी समय सांस लेना बंद करते हैं?                       | हाँ 1<br>नहीं 2<br>पता नहीं 8                                                                                                                                                                                                                          | <br><b>"2", "8" go to Q.9</b>                            |
| 8. प्रायः कितने अंतराल में आप सोने के दौरान आप किसी समय सांस लेना बंद करते हैं?                                                        | कभी-कभार (<1 रात/सप्ताह) 1<br>कभी- कभी (1-2 रातें/सप्ताह) 2<br>बार-बार (3-5 रातें/सप्ताह) 3<br>हमेशा या अधिकतर (6-7 रातें/सप्ताह) 4<br>पता नहीं 8                                                                                                      |                                                          |
| 9. क्या आपको डाक्टर के द्वारा बताया गया है कि आपको sleep apnea है? (एसी अवस्था जिसमें सोने के दौरान समय समय पर सांस बंद होती रहती है ) | हाँ 1<br>नहीं 2<br>पता नहीं 8                                                                                                                                                                                                                          | <br><b>"1" go to Q.11</b><br><b>"2", "8" go to Q.10</b> |
| 10. क्या आपको कभी डाक्टर के द्वारा यह बताया गया है कि आपको कोई नींद संबंधी रोग (बीमारी) है।                                            | हाँ 1<br>नहीं 2<br>पता नहीं 8                                                                                                                                                                                                                          | <br><b>"2", "8" go to Q.11</b>                         |
| 10.A. यदि ऊपर दिए गए प्रश्न का उत्तर हाँ है तो कृपया बीमारी का विवरण दें।<br><hr/> <hr/>                                               |                                                                                                                                                                                                                                                        |                                                                                                                                             |
| 11. क्या आप समान्यतः सोने के दौरान आक्सीजन थेरपी (मास्क या नासिका नली के द्वारा आक्सीजन पहुँचाना) प्रयोग करते हैं?                     | हाँ 1<br>नहीं 2                                                                                                                                                                                                                                        |                                                        |
| 12. पिछले साल के दौरान जहाँ आप सोते हैं आपके साथ या आपके कमरे के पास परिवार के एक या एक से अधिक सदस्य सोएँ हैं?                        | कभी नहीं 1<br>कभी-कभी 2<br>कभी-कभार 3                                                                                                                                                                                                                  |                                                        |

13. निम्नलिखित परिस्थितियों में से प्रत्येक परिस्थिति में आप कितना ऊँचे हो या नींद महसूस कि है? (नीचे दिए काड से संकेत करें)। यदि

[No chance=1; Slight chance=2; Moderate chance=3; High chance=4]

आप ऐसी परिस्थितियों में कभी नहीं या कभी-कभार आए हैं तो कृपया उतम अनुमान लगाएं।

- A. बैठे हुए या पढ़ते हुए
- B. टी.वी. देखते हुए
- C. सार्वजनिक जगह पर निष्क्रिय बैठे हुए
- D. यात्री के रूप में कार में लगातार एक घंटे सफर करते हुए
- E. परिस्थिति अनुसार दोपहर बाद आराम करते हुए
- F. बैठकर किसी से बात करते हुए
- G. दोपहर खाने बाद बैठे हुए
- H. कार के अंदर जब आप कुछ देर के लिए ट्रैफिक में रूके हुए।
- I. रात के खाने की मेज पर
- J. गाड़ी चलाते समय

  
  
  
  
  
  
  
  
  


14. क्या आप प्रायः ऐंज़परिन युक्त औषधि जैसे-बफरीन, ऐस्पेरिन या ऐस्ककरपरटीन लेते हैं?

कभी नहीं

1

प्रायः हफ्ते में एक बार से कम

2

हफ्ते में एक या दो बार

3

प्रत्येक दूसरे दिन (दो में से एक दिन )

4

प्रतिदिन

5

नहीं जानते

8

15. क्या आप ड्राइव (चालन) करते हैं?

हाँ

1

नहीं

2

16. यदि आपका ऊपर दिए गए प्रश्न का उत्तर हाँ है तो निम्नलिखित प्रश्नों का उत्तर दिजिए अन्यथा पार्ट E डाईट पर जाएं।

A. आपने कितने वर्ष ड्राइविंग की है?



B. अक्सर आप ड्राइव करते हैं?

[everyday=1; sometimes=2; rarely/never=3]

C. जब से आपने ड्राइव शुरू की है आप कितनी दुर्घटना कर चुके है जब आप स्वयं चालक थे?



D. आपने गत वर्ष में कितनी दुर्घटनाए की है जब आप स्वयं चालक थे?



### PART - E: आहार (खुराक)

1. क्या आप कोई विशेष आहार (खुराक) ले रहे है?

हाँ

1

नहीं

2

"2" go to Q.4

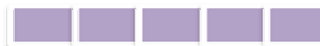

|                                                                                     |                                                                                                                                                             |  |
|-------------------------------------------------------------------------------------|-------------------------------------------------------------------------------------------------------------------------------------------------------------|--|
| <p>2. यदि हॉ तो वर्तमान मे क्या आहार (खुराक) ले रहें है?<br/>[हॉ = 1; नहीं = 2]</p> | <p>मधुमेह संबंधी आहार<br/>कम वसा युक्त आहार<br/>अतिरिक्त रेशे युक्त आहार<br/>कम नमक युक्त आहार<br/>वजन कम करने वाला आहार<br/>अन्य (विवरण दें)<br/>_____</p> |  |
|-------------------------------------------------------------------------------------|-------------------------------------------------------------------------------------------------------------------------------------------------------------|--|

|                                                     |                     |  |
|-----------------------------------------------------|---------------------|--|
| <p>3. कितने वर्षों से आप विशेष आहार ले रहें है?</p> | <p>वर्ष  महिने </p> |  |
|-----------------------------------------------------|---------------------|--|

|                                                           |                                                                                                                                                                                                                                                                                     |         |   |                                |   |                      |   |                         |   |          |   |  |
|-----------------------------------------------------------|-------------------------------------------------------------------------------------------------------------------------------------------------------------------------------------------------------------------------------------------------------------------------------------|---------|---|--------------------------------|---|----------------------|---|-------------------------|---|----------|---|--|
| <p>4. आप फिर से पकाए हुए तेल का कितना प्रयोग करते हैं</p> | <table border="1"> <tr> <td>रोज़ाना</td> <td>1</td> </tr> <tr> <td>हर दूसरे दिन (दो मे से एक दिन)</td> <td>2</td> </tr> <tr> <td>हफते मे एक या दो बार</td> <td>3</td> </tr> <tr> <td>हफते मे एक बार से भी कम</td> <td>4</td> </tr> <tr> <td>कभी नहीं</td> <td>5</td> </tr> </table> | रोज़ाना | 1 | हर दूसरे दिन (दो मे से एक दिन) | 2 | हफते मे एक या दो बार | 3 | हफते मे एक बार से भी कम | 4 | कभी नहीं | 5 |  |
| रोज़ाना                                                   | 1                                                                                                                                                                                                                                                                                   |         |   |                                |   |                      |   |                         |   |          |   |  |
| हर दूसरे दिन (दो मे से एक दिन)                            | 2                                                                                                                                                                                                                                                                                   |         |   |                                |   |                      |   |                         |   |          |   |  |
| हफते मे एक या दो बार                                      | 3                                                                                                                                                                                                                                                                                   |         |   |                                |   |                      |   |                         |   |          |   |  |
| हफते मे एक बार से भी कम                                   | 4                                                                                                                                                                                                                                                                                   |         |   |                                |   |                      |   |                         |   |          |   |  |
| कभी नहीं                                                  | 5                                                                                                                                                                                                                                                                                   |         |   |                                |   |                      |   |                         |   |          |   |  |

5. आप निम्नलिखित आहार कितनी बार लेते हैं? [आहार की आवृत्ति उपयुक्त कॉलम में लिखिए]

| क्र. सं. | आहार समूह                          | आहार बिल्कुल भी नहीं/ एक बार से भी कम/ महीने में [√] | उपभोग प्रतिमास | उपभोग प्रतिमाह | उपभोग प्रतिदिन |
|----------|------------------------------------|------------------------------------------------------|----------------|----------------|----------------|
| 1        | मांस                               |                                                      |                |                |                |
| 2        | मुर्गी                             |                                                      |                |                |                |
| 3        | जार्जन मांस                        |                                                      |                |                |                |
| 4        | मछली                               |                                                      |                |                |                |
| 5        | सीपदार मछली और केकंडा              |                                                      |                |                |                |
| 6        | अंडे                               |                                                      |                |                |                |
| 7        | दूध और दूध के पदार्थ               |                                                      |                |                |                |
| 8        | दूध आधारित मिठाई                   |                                                      |                |                |                |
| 9        | ज्यादा तले पदार्थ- वेस्टर्न स्टाईल |                                                      |                |                |                |
| 10       | ज्यादा तले पदार्थ- देसी स्टाईल     |                                                      |                |                |                |
| 11       | वेस्टर्न स्टाईल - मिठाई/नैक्स      |                                                      |                |                |                |
| 12       | मिठाई                              |                                                      |                |                |                |
| 13       | ठंडी बीयर                          |                                                      |                |                |                |
| 14       | फल (1)                             |                                                      |                |                |                |
| 15       | फल (2)                             |                                                      |                |                |                |
| 16       | फलों का जूस                        |                                                      |                |                |                |
| 17       | बदाम/बीज                           |                                                      |                |                |                |
| 18       | हरी पतेदार सब्जियां                |                                                      |                |                |                |
| 19       | अन्य कच्ची सब्जियां                |                                                      |                |                |                |



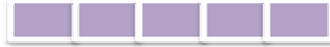

|    |                              |  |  |  |  |
|----|------------------------------|--|--|--|--|
| 20 | छाल और फलियां                |  |  |  |  |
| 21 | आपार और मुरब्बा              |  |  |  |  |
| 22 | अन्य पकी हुई सब्जियां        |  |  |  |  |
| 23 | परिष्कृत अनाज कम रेशो के साथ |  |  |  |  |
| 24 | पूर्ण अनाज                   |  |  |  |  |
| 25 | चय का अपभोग                  |  |  |  |  |
| 26 | कॉफी का अपभोग                |  |  |  |  |

### खाद्य पदार्थों का समूह ( प्रत्येक समूह की प्रदर्शित मद )

मांस/मुर्गी- मुर्गा, भेड का मांस, बछड़े का मांस, खरगोश का मांस, टर्की का मांस, बमख का मांस, तीतर का मांस, इन सभी की कढ़ी, गॉय और भैंस का मांस, सुअर का मांस

आर्गन मांस- कलेजा, गुर्दा, तिल्ली, सांसज (मांसादि से भरी हुई खड़ाइय वस्तु), पांवे।

मछली- नदी, और समुंद्र की मछली, परिरक्षित (प्रिजर्व) मछली जैसे - नमक युक्त मछली, टिन के डब्बे में सुरक्षित रखी हुई मछली, सूखी मछली

सीपदार मछली और केंकडा- केंकडा, समुद्रफेनी, झींगा, घेगा, बडी मछली

अंडे-प्रतिरक्षित अंडे, बतख के अंडे

दूध और दूध के पदार्थ -दूध, दूध से जमाकर बनाया गया खाद्य पदार्थ पनीर, दही, रायता, लस्सी,

दूध आधारित मिठाई ----- कस्टर्ड (पकाया हुआ दूध) खोया, फिर्नी, खीर, दूध की बनी खीर।

ज्यादा तले हुए पदार्थ ----- वेस्टर्न स्टाईल --- चिप्स, आलु की चिप्स, प्याज के छल्ले, चिकन बडी।

ज्यादा तले हुए पदार्थ ---- देशी स्टाईल ----- समोसे, पापड़, पकोटे, सेब, मतकपारे, ऐग रोल, पूरी, कचौडी।

वेस्टर्न स्टाईल मिठाई, स्नैकस ---- केक, पाई, चॉकलेट, टॉफी, बिस्कुट।

मिठाई ---- बर्फी, लड्डू, रसगुल्ले, गुलाब जामुन, हलवा, सबईया, मोहालबीया।

ठंडे पेय पदार्थ ---- कार्बोनेटड पेय पदार्थ, शरबत और अन्य सॉफ्ट पेय पदार्थ (अल्कोहल रहित पेय पदार्थ )

फल (1) ---- स्ट्राबेरी, अन्नास, जामुन, सेब

फल (2) ---- सभी मौसमी फल उपरोक्त फलो को छोड़कर।

फलों का रस ---- किसी भी किस्म का रस, घर में बना रस, खरीदा हुआ रस, ताजा रस, ठंडा रस।

बादाम/बीज ---- मूँगफली, बादाम, सूरजमुखी के बीज, काजू, अखरोट।

हरी पत्तेदार सब्जी ----- सभी ताजी हरी पत्तेदार सब्जियाँ, पालक (साग), सरसों या शलगम, कच्चा या पका साग।

अन्य कच्ची सब्जियाँ ---- कोई भी कच्ची सब्जियाँ इसमें पिछली श्रेणी की सब्जियाँ शामिल नहीं है।

फलिया और दालें ---- इनमें सभी प्रकार की दालें, छोले और मसूर की दाल शामिल हैं।

आचार और मुरब्बा ---- अचार, चटनी, सब्जियों का मुरब्बा आदि।

अन्य पकी हुई सब्जियाँ ---- कोई भी पकी हुई सब्जियाँ इनमें पिछली श्रेणी की सब्जियाँ शामिल नहीं है।

परिष्कृत ( शुद्ध ) अनाज कम रेशो के साथ ---- उबले हुए चावल, तले हुए चावल, बिरयानी, पुलाव, इडली, डोसा, सूजी, साबूदाना, जौ, पास्ता, शीरमल नान, तफवाल, ब्रैड स्लाइस।

पूर्ण अनाज (ज्यादा रेशो वाला खाना) ---- मोटे आटे की बनी रोटी, भरी मठरी, पूर्ण गेहूँ का दलिया, ब्रैड स्लाउस, पूर्ण भोजन।

चाय और कॉफी ---- काली चाय, कॉफी डूध और चीनी रहित और रहित और अन्य चाय।

### SECTION - 3: स्त्री प्रजनन संबंधी विवरण

यह भाग केवल महिला प्रतिभागी ही भरे, पुरुष प्रतिभागी यह भाग छोड़ दें और भाग 4 पर जाएं

1. आप कितनी बार गर्भवती हो चुकी हैं?

लागू नहीं=99

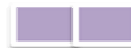

|                                                                                         |                            |                            |                                                                                            |
|-----------------------------------------------------------------------------------------|----------------------------|----------------------------|--------------------------------------------------------------------------------------------|
| 2. जब आपको मासिक धर्म या महीना आना शुरू हुआ था, मब आपकी उम्र क्या थी?                   | Years <input type="text"/> |                            |                                                                                            |
| 3. क्या आपको मासिक धर्म/महीना होता है?                                                  | हाँ                        | 1                          | <input type="text"/>                                                                       |
|                                                                                         | नहीं                       | 2                          |                                                                                            |
| 4. यदि नहीं तो कारण क्या है?                                                            | गर्भावस्था                 | 1                          | <input type="text"/><br>अन्य, विवरण दें।                                                   |
|                                                                                         | बच्चा दूध पिता है          | 2                          |                                                                                            |
|                                                                                         | प्राकृतिक रजोनिवृत्ति      | 3                          |                                                                                            |
|                                                                                         | शहयक रजोनिवृत्ति           | 4                          |                                                                                            |
|                                                                                         | अन्य (विवरण दें)           | 5                          |                                                                                            |
| 5. यदि आपको मासिक धर्म/महीना आना बंद हो चुका है, तो कितने समय से बंद है?                | वर्ष <input type="text"/>  | महिने <input type="text"/> |                                                                                            |
| 6. क्या आप हारमोनल ड्रग्स या गर्भनिरोधक दवाएँ इस्तेमाल करती हैं?<br>[हाँ = 1; नहीं = 2] | पहले करती थी               | <input type="text"/>       | यदि हाँ अवधि वर्षों में महीनों में<br><input type="text"/> वर्ष <input type="text"/> महीने |
|                                                                                         | आजकल करती हैं              | <input type="text"/>       | यदि हाँ अवधि वर्षों में महीनों में<br><input type="text"/> वर्ष <input type="text"/> महीने |

**SECTION - 4: जीवन का स्वरूप (EQ-5D)** © 1990 EuroQol Group. EQ-5D™ is a trade mark of the EuroQol Group.

बाक्स में दिए गए विकल्पों में से एक विकल्प की नियुक्ति कर कृपया उस कथन की ओर संकेत करें जो आपके आज के दिन की स्वास्थ्य की स्थिति का भली प्रकार वर्णन करता है।

|                                                                                                          |                                                                                                                                                                          |                      |
|----------------------------------------------------------------------------------------------------------|--------------------------------------------------------------------------------------------------------------------------------------------------------------------------|----------------------|
| 1. गतिशीलता (चलना फिरना)                                                                                 | मुझे इधर-उधर घुमने में कोई समस्या नहीं है। =1<br>मुझे इधर-उधर घुमने में कोई समस्या है। =2<br>मैं बिस्तर तक सीमित हूँ। =3                                                 | <input type="text"/> |
| 2. स्वयं देखभाल                                                                                          | मुझे स्वयं की देखभाल करने में कोई समस्या नहीं है। =1<br>मुझे स्वयं को साफ रखने या तैयार करने में समस्या है। =2<br>मैं स्वयं को साफ रखने या तैयार करने में असक्षम हूँ? =3 | <input type="text"/> |
| 3. सामान्य क्रियाशीलता<br>जैसे-कार्य करना, पढ़ाई करना, गृहकार्य,<br>परिवारिक या फुरसत से की हुई क्रियाएँ | मुझे सामान्य क्रियाएँ करने में समस्या नहीं होती। =1<br>मुझे सामान्य क्रियाएँ करने में कुछ समस्या होती है। =2<br>मैं अपनी सामान्य क्रियाएँ करने में असक्षम हूँ? =3        | <input type="text"/> |
| 4. दर्द/ असुविधा                                                                                         | मुझे दर्द या असुविधा नहीं है। =1<br>मुझे मध्यमवर्ती दर्द या असुविधा है। =2<br>मुझे अत्याधिक दर्द या असुविधा है। =3                                                       | <input type="text"/> |
| 5. दुश्चिंता उत्कंठा/दवाब                                                                                | मैं उत्कंठा या दवाब में नहीं हूँ =1<br>मैं मध्यमवर्ती उत्कंठा या दवाब में हूँ =2                                                                                         | <input type="text"/> |

|  |                                         |  |
|--|-----------------------------------------|--|
|  | मैं अत्याधिक उत्कंठा या दवाब में हूँ =3 |  |
|--|-----------------------------------------|--|

To help people say how good or bad their state of health is, we have drawn a scale (rather like a thermometer) on which the best state you can imagine is marked 100 and the worst state you can imagine is marked 0.

I would like you to indicate on this scale how good or bad your own health is today, in your opinion. Please do this by drawing a line from the box below to whichever point on the scale indicates how good or bad your state of health is today.

**Your own  
state of health  
today**

Best imaginable  
state of health

100

90

80

70

60

50

40

30

20

10

0

Worst imaginable  
state of health

**SECTION - 5: चिकित्सीय (मेडिकल) विवरण****PART-A: कार्डियोमेटाबॉलिक डिजीज और सनके जोखिक वाले कारक**

|                                                                                                                          |                                                                                                       |                                                                                                                                                                      |
|--------------------------------------------------------------------------------------------------------------------------|-------------------------------------------------------------------------------------------------------|----------------------------------------------------------------------------------------------------------------------------------------------------------------------|
| 1. क्या आपको डाक्टर के द्वारा बताया गया है की आपको निम्नलिखित में से कोई बीमारी है?<br><br>[हाँ =1; नहीं =2; पता नहीं=3] | उच्चरक्तचाप<br>मधुमेह<br>उच्च कोलेस्ट्रॉल<br>हृदय रोग<br>स्ट्रोक या घात (लकवे का अटैक)<br>किडनी डिजीज | <input type="checkbox"/><br><input type="checkbox"/><br><input type="checkbox"/><br><input type="checkbox"/><br><input type="checkbox"/><br><input type="checkbox"/> |
|--------------------------------------------------------------------------------------------------------------------------|-------------------------------------------------------------------------------------------------------|----------------------------------------------------------------------------------------------------------------------------------------------------------------------|

\*गर्भावस्था को छोड़कर गर्भावस्था के दौरान उच्चरक्तचाप और मधुमेह से प्रेरित होना।

यदि प्र.1 के विकल्पों में से एक भी उत्तर हाँ में है तो भाग- B पर जाइए अन्यथा पूरे भाग B को छोड़कर भाग C पर जाइए

**PART - B: बीमारी के विषिट (विशेष) प्रश्न****I. उच्चरक्तचाप**

यह भाग भरिए यदि भाग A (प्र.1) उच्चरक्तचाप का उत्तर हाँ में है।

|                                                                                                                                                                                   |                                                                                                                                                                                 |                                                                                                                                          |
|-----------------------------------------------------------------------------------------------------------------------------------------------------------------------------------|---------------------------------------------------------------------------------------------------------------------------------------------------------------------------------|------------------------------------------------------------------------------------------------------------------------------------------|
| a. आपको कितने वर्षों से उच्चरक्तचाप है?                                                                                                                                           |                                                                                                                                                                                 | अवधि वर्षों में महीनों में<br>वर्ष <input type="text"/> <input type="text"/> महीने <input type="text"/> <input type="text"/>             |
| b. वर्तमान में आप इसका क्या इलाज ले रहे हैं?<br>[हाँ=1; नहीं=2]<br>*पौराणिक औषधि, थेरपी के साथ योगा, आर्युवेद, यूनानी, होमियोपैथिक चीकित्सा, तिब्बतन, प्रकृतिक चीकित्सा, मेडिटेशन | निर्धारित खान-पान (आहार) संबंधी सुधार<br>निर्धारित शारीरिक व्यायाम<br>पौराणिक औषधि/ थेरपी*<br>एलोपैथीक ड्रग्स (इंगलिश/माफडर्न)<br>कोई नहीं                                      | <input type="checkbox"/><br><input type="checkbox"/><br><input type="checkbox"/><br><input type="checkbox"/><br><input type="checkbox"/> |
| c. आप कितना नियमानुसार दवाई लेते हैं?                                                                                                                                             | नियमित रूप से 1<br>अक्सर भूल जाते हैं 2<br>जब उच्चरक्तचाप महसूस होता है तब ही दवाई लेते हैं 3<br>एक समय में एक महीने से ज्यादा अनियमित हो जाते हैं 4<br>कभी भी दवाई नहीं लेते 5 | <input type="checkbox"/>                                                                                                                 |
| यदि आपके उपरोक्त प्रश्न का उत्तर "4" है तो अगले प्रश्न पर जाएं अन्यथा प्र. e पर जाएं।                                                                                             |                                                                                                                                                                                 |                                                                                                                                          |
| d. अनियमितता का कारण क्या है?                                                                                                                                                     | खर्च वहन नहीं कर पाते 1<br>सहन नहीं कर पाते 2<br>स्वस्थ हो गए हैं 3<br>कोई कारण नहीं है 4<br>याद नहीं 5<br>अन्य (विवरण दें) 6                                                   | <input type="checkbox"/><br><br><b>अन्य, विवरण दें।</b><br><hr/>                                                                         |

|                                                                                                                                                                                   |                                                                                                                                                                       |                       |                                                                                                              |
|-----------------------------------------------------------------------------------------------------------------------------------------------------------------------------------|-----------------------------------------------------------------------------------------------------------------------------------------------------------------------|-----------------------|--------------------------------------------------------------------------------------------------------------|
| e. क्या आपको लगता है कि आपका रक्तचाप अच्छे नियंत्रण में है?                                                                                                                       | हाँ<br>नहीं<br>पता नहीं                                                                                                                                               | 1<br>2<br>3           | <input type="checkbox"/>                                                                                     |
| f. क्या आपको डाक्टर कहता है कि आपका रक्तचाप अच्छे नियंत्रण में है?                                                                                                                | हाँ<br>नहीं<br>पता नहीं                                                                                                                                               | 1<br>2<br>3           | <input type="checkbox"/>                                                                                     |
| g. आपके पिछले रक्तचाप की रिकॉर्डिंग क्या थी? (जब आपकी डाक्टर ने जांच की थी)                                                                                                       | _____ (systolic) / _____ (diastolic) mmHg                                                                                                                             |                       |                                                                                                              |
| h. आपने अपने डाक्टर से आखिरी सलाह कब ली थी?                                                                                                                                       | एक महीने से कम<br>एक महीने से ज्यादा<br>3 महीने से ज्यादा<br>6 महीने से कम<br>6 महीने से ज्यादा                                                                       | 1<br>2<br>3<br>4<br>5 | <input type="checkbox"/>                                                                                     |
| i. क्या आपके पास उच्चरक्तचाप संबंधी चिकित्सीय विवरण या औषध विधि है?                                                                                                               | हाँ<br>नहीं<br>पता नहीं                                                                                                                                               | 1<br>2<br>3           | <input type="checkbox"/>                                                                                     |
| j. यदि उत्तर हाँ है तो प्रतिभागी से चिकित्सीय विवरण दिखाने को कहिए और नीचे रोग निदान लिखिए?                                                                                       |                                                                                                                                                                       |                       |                                                                                                              |
| k. अत्यंत हाल ही में चिकित्सीय विवरण या चिकित्सा से परतापित रक्तचाप पर संक्षिप्त लेख लिखिए?                                                                                       |                                                                                                                                                                       |                       |                                                                                                              |
| <b>II. मधुमेह</b>                                                                                                                                                                 |                                                                                                                                                                       |                       |                                                                                                              |
| यह भाग भरिए यदि भाग A (प्र.1) मधुमेह का उत्तर हाँ में है।                                                                                                                         |                                                                                                                                                                       |                       |                                                                                                              |
| a. आपको कितने वर्षों से मधुमेह है?                                                                                                                                                | अवधि वर्षों/महिनों में<br>वर्ष <input type="text"/> <input type="text"/> महिन <input type="text"/> <input type="text"/>                                               |                       |                                                                                                              |
| b. वर्तमान में आप इसका क्या इलाज ले रहे हैं?<br>[हाँ=1; नहीं=2]<br>*पौराणिक औषधि, थेरपी के साथ योगा, आयुर्वेद, यूनानी, होमियोपैथिक चीकित्सा, तिब्बतन, प्रकृतिक चीकित्सा, मेडिटेशन | निर्धारित खान-पान (आहार) संबंधी सुधार<br>निर्धारित शारीरिक व्यायाम<br>पौराणिक औषधि/ थेरपी*<br>एलोपैथीक ड्रग्स (इंगलिश/माफडर्न)<br>कोई नहीं                            |                       | <input type="checkbox"/><br><input type="checkbox"/><br><input type="checkbox"/><br><input type="checkbox"/> |
| c. आप कितना नियमानुसार दवाई लेते हैं?                                                                                                                                             | नियमित रूप से<br>अक्सर भूल जाते हैं<br>जब उच्चरक्तचाप महसूस होता है तब ही दवाई लेते हैं<br>एक समय में एक महीने से ज्यादा अनियमित हो जाते हैं<br>कभी भी दवाई नहीं लेते | 1<br>2<br>3<br>4<br>5 | <input type="checkbox"/>                                                                                     |



यदि आपके उपरोक्त प्रश्न का उत्तर "4" है तो अगले प्रश्न पर जाएं अन्यथा प्र. e पर जाएं।

|                                                                                                                                                                     |                                                                                                                               |                                                       |
|---------------------------------------------------------------------------------------------------------------------------------------------------------------------|-------------------------------------------------------------------------------------------------------------------------------|-------------------------------------------------------|
| d. अनियमितता का कारण क्या है?                                                                                                                                       | खर्च वहन नहीं कर पाते 1<br>सहन नहीं कर पाते 2<br>स्वस्थ हो गए हैं 3<br>कोई कारण नहीं है 4<br>याद नहीं 5<br>अन्य (विवरण दें) 6 | <input type="checkbox"/><br>अन्य, विवरण दें।<br>_____ |
| e. क्या आपको लगता है कि आपका मधुमेह अच्छे नियंत्रण में है?                                                                                                          | हाँ 1<br>नहीं 2<br>पता नहीं 3                                                                                                 | <input type="checkbox"/>                              |
| f. क्या आपको डाक्टर कहता है कि आपका मधुमेह अच्छे नियंत्रण में है?                                                                                                   | हाँ 1<br>नहीं 2<br>पता नहीं 3                                                                                                 | <input type="checkbox"/>                              |
| g. आपका खाली पेट और खाने के बाद का ब्लड शुगर का स्तर क्या है जब आपने आखिरी बार जांच करवाई थी?                                                                       | खाली पेट _____mg/dl<br>खाने के बाद _____mg/dl                                                                                 |                                                       |
| h. आपने अपने डाक्टर से आखिरी सलाह कब ली थी?                                                                                                                         | एक महीने से कम 1<br>एक महीने से ज़्यादा 2<br>3 महीने से ज़्यादा 3<br>6 महीने से कम 4<br>6 महीने से ज़्यादा 5                  | <input type="checkbox"/>                              |
| i. क्या आपके पास उच्चरक्तचाप संबंधी चिकित्सीय विवरण या औषध विधि है?                                                                                                 | हाँ 1<br>नहीं 2<br>पता नहीं 3                                                                                                 | <input type="checkbox"/>                              |
| j. यदि उत्तर हाँ है तो प्रतिभागी से चिकित्सीय विवरण दिखाने को कहिए और नीचे रोग निदान लिखिए?                                                                         |                                                                                                                               |                                                       |
| k. अत्यंत हाल ही कें चिकित्सीय विवरण या चिकित्सा से परतापित खाली पेट और खाने के बाद के ब्लड शुगर का स्तर को लिखिए?<br>खाली पेट _____mg/dl<br>खाने के बाद _____mg/dl |                                                                                                                               |                                                       |
| भाग D भी पूरा करें                                                                                                                                                  |                                                                                                                               |                                                       |

### III. हाई ब्लड कोलेस्ट्रॉल

यह भाग भरिए यदि भाग A (प्र.1) हाई ब्लड कोलेस्ट्रॉल का उत्तर हाँ में है।

|                                                                                                                                                                                   |                                                                                                                                                                                          |                                                                                                                                          |
|-----------------------------------------------------------------------------------------------------------------------------------------------------------------------------------|------------------------------------------------------------------------------------------------------------------------------------------------------------------------------------------|------------------------------------------------------------------------------------------------------------------------------------------|
| a. आपको कितने वर्षों से हाई ब्लड कोलेस्ट्रॉल है?                                                                                                                                  | अवधि वर्षों/महिनों में                                                                                                                                                                   |                                                                                                                                          |
|                                                                                                                                                                                   | वर्ष <input type="text"/>                                                                                                                                                                | महिने <input type="text"/>                                                                                                               |
| b. वर्तमान में आप इसका क्या इलाज ले रहे हैं?<br>[हाँ=1; नहीं=2]<br>*पौराणिक औषधि, थेरपी के साथ योगा, आर्युवेद, यूनानी, होमियोपैथिक चीकित्सा, तिब्बतन, प्रकृतिक चीकित्सा, मेडिटेशन | निर्धारित खान-पान (आहार) संबंधी सुधार<br>निर्धारित शारीरिक व्यायाम<br>पौराणिक औषधि/ थेरपी*<br>एलोपैथिक ड्रग्स (इंगलिश/माफडर्न)<br>कोई नहीं                                               | <input type="checkbox"/><br><input type="checkbox"/><br><input type="checkbox"/><br><input type="checkbox"/><br><input type="checkbox"/> |
| c. आप कितना नियमानुसार दवाई लेते हैं?                                                                                                                                             | नियमित रूप से 1<br>अक्सर भूल जाते हैं 2<br>जब हाई ब्लड कोलेस्ट्रॉल महसूस होता है तब ही दवाई लेते हैं 3<br>एक समय में एक महीने से ज्यादा अनियमित हो जाते हैं 4<br>कभी भी दवाई नहीं लेते 5 | <input type="checkbox"/>                                                                                                                 |
| यदि आपके उपरोक्त प्रश्न का उत्तर "4" है तो अगले प्रश्न पर जाएं अन्यथा प्र. e पर जाएं।                                                                                             |                                                                                                                                                                                          |                                                                                                                                          |
| d. अनियमितता का कारण क्या है?                                                                                                                                                     | खर्च वहन नहीं कर पाते 1<br>सहन नहीं कर पाते 2<br>स्वस्थ हो गए हैं 3<br>कोई कारण नहीं है 4<br>याद नहीं 5<br>अन्य (विवरण दें) 6                                                            | <input type="checkbox"/><br><b>अन्य, विवरण दें।</b><br>_____                                                                             |
| e. क्या आपको लगता है कि आपका हाई ब्लड कोलेस्ट्रॉल अच्छे नियंत्रण में है?                                                                                                          | हाँ 1<br>नहीं 2<br>पता नहीं 3                                                                                                                                                            | <input type="checkbox"/>                                                                                                                 |
| f. क्या आपको डाक्टर कहता है कि आपका हाई ब्लड कोलेस्ट्रॉल अच्छे नियंत्रण में है?                                                                                                   | हाँ 1<br>नहीं 2<br>पता नहीं 3                                                                                                                                                            | <input type="checkbox"/>                                                                                                                 |
| g. आपके पिछले हाई ब्लड कोलेस्ट्रॉल की रिकॉर्डिंग क्या थी? (जब आपकी डाक्टर ने जांच की थी)                                                                                          | _____ (systolic) / _____ (diastolic) mmHg                                                                                                                                                |                                                                                                                                          |
| h. आपने अपने डाक्टर से आखिरी सलाह कब ली थी?                                                                                                                                       | एक महीने से कम 1<br>एक महीने से ज्यादा 2<br>3 महीने से ज्यादा 3<br>6 महीने से कम 4<br>6 महीने से ज्यादा 5                                                                                | <input type="checkbox"/>                                                                                                                 |

|                                                                                                                                                                                          |                                                                                                                                                |                                 |                                                                                                                                                                             |
|------------------------------------------------------------------------------------------------------------------------------------------------------------------------------------------|------------------------------------------------------------------------------------------------------------------------------------------------|---------------------------------|-----------------------------------------------------------------------------------------------------------------------------------------------------------------------------|
| i. क्या आपके पास हाई ब्लड कोलेस्ट्रॉल संबंधी चिकित्सीय विवरण या औषध विधि है?                                                                                                             | हाँ<br>नहीं<br>पता नहीं                                                                                                                        | 1<br>2<br>3                     | <input type="checkbox"/>                                                                                                                                                    |
| j. यदि उत्तर हाँ है तो प्रतिभागी से चिकित्सीय विवरण दिखाने को कहिए और नीचे रोग निदान लिखिए?                                                                                              |                                                                                                                                                |                                 |                                                                                                                                                                             |
| k. अत्यंत हाल ही में चिकित्सीय विवरण या चिकित्सा से परतापित रक्तचाप पर संक्षिप्त लेख लिखिए?                                                                                              |                                                                                                                                                |                                 |                                                                                                                                                                             |
| <b>IV. हृदय रोग</b>                                                                                                                                                                      |                                                                                                                                                |                                 |                                                                                                                                                                             |
| यह भाग भरिए यदि भाग A (प्र.1) हृदय रोग का उत्तर हाँ में है।                                                                                                                              |                                                                                                                                                |                                 |                                                                                                                                                                             |
| a. आपको सबसे पहले कब पता चला कि आपको हृदय रोग है?                                                                                                                                        | <1 year<br>1-5 years<br>>5 years                                                                                                               | 1<br>2<br>3                     | <input type="checkbox"/>                                                                                                                                                    |
| b. डाक्टर ने आपको हृदय रोग के बारे में क्या बताया?                                                                                                                                       | दिल का दौरा<br>ऐन्जाइना(कण्ठ शूल)<br>हृदय गति का रुकना<br>वेल्व डिजीज़<br>हृदय में छेद<br>अन्य*<br>समस्या के बारे में सूचीत नहीं किया          | 1<br>2<br>3<br>4<br>5<br>6<br>7 | <input type="checkbox"/> <input type="checkbox"/> <input type="checkbox"/><br>एक से ज्यादा विकल्पों के लिए<br>पृथक बाक्सों का प्रयोग करें।<br><br>अन्य, विवरण दें।<br>_____ |
| यदि आपके उपरोक्त प्रश्न का उत्तर "1" है तो अगले प्रश्न पर जाएं अन्यथा प्र. g पर जाएं।                                                                                                    |                                                                                                                                                |                                 |                                                                                                                                                                             |
| c. जब आपको पहली बार हार्ट अटैक हुआ तब आपकी उम्र क्या थी?                                                                                                                                 |                                                                                                                                                | वर्ष <input type="text"/>       |                                                                                                                                                                             |
| d. क्या आपको इलाज के लिए अस्पताल में भर्ती किया गया था?                                                                                                                                  | हाँ<br>नहीं                                                                                                                                    | 1<br>2                          | <input type="checkbox"/>                                                                                                                                                    |
| e. क्या आपको दोबारा उसी प्रकार का हार्ट अटैक हुआ?                                                                                                                                        | हाँ<br>नहीं                                                                                                                                    | 1<br>2                          | <input type="checkbox"/>                                                                                                                                                    |
| f. क्या आपको दोबारा का हार्ट अटैक के लिए अस्पताल में भर्ती किया गया था?                                                                                                                  | हाँ<br>नहीं                                                                                                                                    | 1<br>2                          | <input type="checkbox"/>                                                                                                                                                    |
| g. वर्तमान में आप हृदय रोग का क्या इलाज ले रहे हैं?<br>[हाँ=1; नहीं=2]<br>*पौराणिक औषधि, थेरपी के साथ योगा, आयुर्वेद, यूनानी, होमियोपैथिक चिकित्सा, तिब्बतन, प्रकृतिक चिकित्सा, मेडिटेशन | निर्धारित खान-पान (आहार) संबंधी सुधार<br>निर्धारित शारीरिक व्यायाम<br>पौराणिक औषधि / थेरपी*<br>एलोपैथिक ड्रग्स (इंग्लिश / माफडर्न)<br>कोई नहीं |                                 | <input type="checkbox"/><br><input type="checkbox"/><br><input type="checkbox"/><br><input type="checkbox"/><br><input type="checkbox"/>                                    |



|                                                                                                         |                                                                                                                                                                                 |                                                       |
|---------------------------------------------------------------------------------------------------------|---------------------------------------------------------------------------------------------------------------------------------------------------------------------------------|-------------------------------------------------------|
| h. आप कितना नियमानुसार दवाई लेते हैं?                                                                   | नियमित रूप से 1<br>अक्सर भूल जाते हैं 2<br>केवल दवाई जबही लेता हूँ जब अस्वस्थ महसूस करता हूँ 3<br>एक समय में एक महीने से ज्यादा अनियमित हो जाते है 4<br>कभी भी दवाई नहीं लेते 5 | <input type="checkbox"/>                              |
| <b>यदि आपके उपरोक्त प्रश्न का उत्तर '4' है तो प्रश्न '1' पर जाएं अन्यथा प्र. j पर जाएं।</b>             |                                                                                                                                                                                 |                                                       |
| i. अनियमितता का कारण क्या है?                                                                           | खर्च वहन नहीं कर पाते 1<br>सहन नहीं कर पाते 2<br>स्वस्थ हो गए हैं 3<br>कोई कारण नहीं है 4<br>याद नहीं 5<br>अन्य (विवरण दें) 6                                                   | <input type="checkbox"/><br>अन्य, विवरण दें।<br><hr/> |
| j. आपने अपने डाक्टर से आखिरी सलाह कब ली थी?                                                             | एक महीने से कम 1<br>एक महीने से ज्यादा 2<br>3 महीने से ज्यादा 3<br>6 महीने से कम 4<br>6 महीने से ज्यादा 5                                                                       | <input type="checkbox"/>                              |
| k. क्या आपके पास हृदय रोग संबंधी चिकित्सीय विवरण या औषध विधि है?                                        | हाँ 1<br>नहीं 2<br>पता नहीं 3                                                                                                                                                   | <input type="checkbox"/>                              |
| l. यदि उत्तर हाँ है तो प्रतिभागी से चिकित्सीय विवरण दिखाने को कहिए और नीचे रोग निदान लिखिए?             |                                                                                                                                                                                 |                                                       |
| <b>V. घात स्ट्रोक (लकवा)</b><br><b>यह भाग भरिए यदि भाग A (प्र.1) घात (लकवे का अटैक) का उत्तर हाँ मे</b> |                                                                                                                                                                                 |                                                       |
| a. आपकी उम्र क्या थी जब आपको घात (लकवे का अटैक) हुआ था?                                                 | Years <input type="text"/> <input type="text"/>                                                                                                                                 |                                                       |
| b. क्या शरीर के किसी भाग में विकलांगता शेष है?                                                          | हाँ 1<br>नहीं 2                                                                                                                                                                 | <input type="checkbox"/>                              |



|                                                                                                    |                                                                                                                                                                                                                |                                                                                                                                                                                                                                                                         |
|----------------------------------------------------------------------------------------------------|----------------------------------------------------------------------------------------------------------------------------------------------------------------------------------------------------------------|-------------------------------------------------------------------------------------------------------------------------------------------------------------------------------------------------------------------------------------------------------------------------|
| <p>c. यदि हाँ तो इसमें से किस अंग पर इसका असर है?<br/>[Yes=1; No=2]</p>                            | <p>टांगो/पैरो का लकवा<br/>बाजू/हाथ का लकवा<br/>टांगो/पैरो की कमजोरी<br/>बाजू/हाथ की कमजोरी<br/>बोलने में परेशानी<br/>देखने में परेशानी<br/>पेशाब रोकने में असमर्थता<br/>अन्य कोई कमजोरी<br/>विवरण दे _____</p> | <p><input type="checkbox"/><br/><input type="checkbox"/><br/><input type="checkbox"/><br/><input type="checkbox"/><br/><input type="checkbox"/><br/><input type="checkbox"/><br/><input type="checkbox"/><br/><input type="checkbox"/><br/><input type="checkbox"/></p> |
| <p>d. क्या आपको लकवे कि बाद दवाईयों को लेते रहने की सलाह दी गई है?</p>                             | <p>हाँ 1<br/>नहीं 2</p>                                                                                                                                                                                        | <p><input type="checkbox"/></p>                                                                                                                                                                                                                                         |
| <p>e. यदि हाँ तो कितना नियमानुसार दवाई लेते हैं?</p>                                               | <p>नियमित रूप से 1<br/>अक्सर भूल जाते हैं 2<br/>केवल दवाई जबही लेता हूँ जब अस्वस्थ महसूस करता हूँ 3<br/>एक समय में एक महीने से ज्यादा अनियमित हो जाते हैं 4<br/>कभी भी दवाई नहीं लेते 5</p>                    | <p><input type="checkbox"/></p>                                                                                                                                                                                                                                         |
| <p><b>यदि आपके उपरोक्त प्रश्न का उत्तर "4" है तो प्रश्न "f" पर जाएं अन्यथा प्र. g पर जाएं।</b></p> |                                                                                                                                                                                                                |                                                                                                                                                                                                                                                                         |
| <p>f. अनियमितता का कारण क्या है?</p>                                                               | <p>खर्च वहन नहीं कर पाते 1<br/>सहन नहीं कर पाते 2<br/>स्वस्थ हो गए हैं 3<br/>कोई कारण नहीं है 4<br/>याद नहीं 5<br/>अन्य (विवरण दें) 6</p>                                                                      | <p><input type="checkbox"/><br/>अन्य, विवरण दें।<br/>_____</p>                                                                                                                                                                                                          |
| <p>g. आपने अपने डाक्टर से आखिरी सलाह कब ली थी?</p>                                                 | <p>एक महीने से कम 1<br/>एक महीने से ज्यादा 2<br/>3 महीने से ज्यादा 3<br/>6 महीने से कम 4<br/>6 महीने से ज्यादा 5</p>                                                                                           | <p><input type="checkbox"/></p>                                                                                                                                                                                                                                         |
| <p>h. क्या आपके पास घात (लकवे का अटैक) संबंधी चिकित्सीय विवरण या औषध विधि है?</p>                  | <p>हाँ 1<br/>नहीं 2<br/>पता नहीं 3</p>                                                                                                                                                                         | <p><input type="checkbox"/></p>                                                                                                                                                                                                                                         |
| <p>i. यदि उत्तर हाँ है तो प्रतिभागी से चिकित्सीय विवरण दिखाने को कहिए और नीचे रोग निदान लिखिए?</p> |                                                                                                                                                                                                                |                                                                                                                                                                                                                                                                         |

**VI. स्थायी किडनी डिजीज**

यह भाग भरिए यदि भाग A (प्र.1) किडनी डिजीज का उत्तर हाँ में

|                                                                                                                                                                                   |                                                                                                                                                                                         |                                                                                                                                          |
|-----------------------------------------------------------------------------------------------------------------------------------------------------------------------------------|-----------------------------------------------------------------------------------------------------------------------------------------------------------------------------------------|------------------------------------------------------------------------------------------------------------------------------------------|
| a. किस उम्र में आपको किडनी संबंधी बीमारी का पता चला?                                                                                                                              | वर्ष <input type="text"/> <input type="text"/>                                                                                                                                          |                                                                                                                                          |
| b. वर्तमान में आप इसका क्या इलाज ले रहे हैं?<br>[हाँ=1; नहीं=2]<br>*पौराणिक औषधि, थेरपी के साथ योगा, आयुर्वेद, यूनानी, होमियोपैथिक चिकित्सा, तिब्बतन, प्रकृतिक चिकित्सा, मेडिटेशन | निर्धारित खान-पान (आहार) संबंधी सुधार<br>निर्धारित शारीरिक व्यायाम<br>पौराणिक औषधि / थेरपी*<br>एलोपैथिक ड्रग्स (इंगलिश/माफडर्न)<br>कोई नहीं                                             | <input type="checkbox"/><br><input type="checkbox"/><br><input type="checkbox"/><br><input type="checkbox"/><br><input type="checkbox"/> |
| c. आप कितना नियमानुसार दवाई लेते हैं?                                                                                                                                             | नियमित रूप से 1<br>अक्सर भूल जाते हैं 2<br>जब किडनी संबंधी बीमारी महसूस होता है तब ही दवाई लेते हैं 3<br>एक समय में एक महीने से ज्यादा अनियमित हो जाते हैं 4<br>कभी भी दवाई नहीं लेते 5 | <input type="checkbox"/>                                                                                                                 |
| <b>यदि आपके उपरोक्त प्रश्न का उत्तर "4" है तो अगले प्रश्न d पर जाएं अन्यथा प्र. e पर जाएं।</b>                                                                                    |                                                                                                                                                                                         |                                                                                                                                          |
| d. अनियमितता का कारण क्या है?                                                                                                                                                     | खर्च वहन नहीं कर पाते 1<br>सहन नहीं कर पाते 2<br>स्वस्थ हो गए हैं 3<br>कोई कारण नहीं है 4<br>याद नहीं 5<br>अन्य (विवरण दें) 6                                                           | <input type="checkbox"/><br>अन्य, विवरण दें।<br>_____                                                                                    |
| e. क्या आपको लगता है कि आपका किडनी संबंधी बीमारी अच्छे नियंत्रण में है?                                                                                                           | हाँ 1<br>नहीं 2<br>पता नहीं 3                                                                                                                                                           | <input type="checkbox"/>                                                                                                                 |
| f. क्या आपके पास किडनी संबंधी बीमारी का चिकित्सीय विवरण या औषध विधि है?                                                                                                           | हाँ 1<br>नहीं 2<br>पता नहीं 3                                                                                                                                                           | <input type="checkbox"/>                                                                                                                 |
| g. यदि उत्तर हाँ है तो प्रतिभागी से चिकित्सीय विवरण दिखाने को कहिए और नीचे रोग निदान लिखिए?                                                                                       |                                                                                                                                                                                         |                                                                                                                                          |

**PART - C: एन्जाइना (कण्ठशूल) परिधीम नाडी संबंधी बीमारी (परिफरल वैस्कुलर डिजीज) और हृदय गति का रुकना**
**I. एन्जाइना**

a. क्या आपको इनमें से कोई लक्षण है?

[हाँ =1; नहीं =2]

धडकन महसूस होना (स्पन्दन)

छाती में दर्द

संस फूलना

थकावट/कमजोरी

छाती में असुविधा/भारीपन/बेचैनी

  
  
  
  


"2" for all, skip to Q. m

b. परिश्रमी गतिविधियाँ जैसे—तेज़ चलना, सीढ़ियां चढ़ना, वज़न उठाना इत्यादि के दौरान क्या आपको छाती में या छाती के आसपास, भुजाओं, कंधों, गरदन, नीचले जबड़े, पेट से या पीठ के ऊपरी हिस्से में इनमें से कोई लक्षण महसूस होते हैं?

[हाँ =1; नहीं =2]

दर्द

भारीपन

दबाव

असुविधा

सुन्नता

  
  
  
  


"2" for all, skip to Q. d

c. प्र. (a) और (b) में बताए गए लक्षणों को आप सबसे ज्यादा कहाँ महसूस करते हैं?

[Yes=1; No=2]

(नीचे दिए गए चित्र में बताए गए लक्षणों के स्थान को नम्बर से इंगित करें)

(अतिरिक्त न. छाती के पिछे = 11, गरदन के पिछे = 12)

लक्षण

स्थान

दर्द

भारीपन

असुविधा

सुन्नता

  
  
  


|                          |                          |
|--------------------------|--------------------------|
| <input type="checkbox"/> | <input type="checkbox"/> |
| <input type="checkbox"/> | <input type="checkbox"/> |
| <input type="checkbox"/> | <input type="checkbox"/> |
| <input type="checkbox"/> | <input type="checkbox"/> |

Right

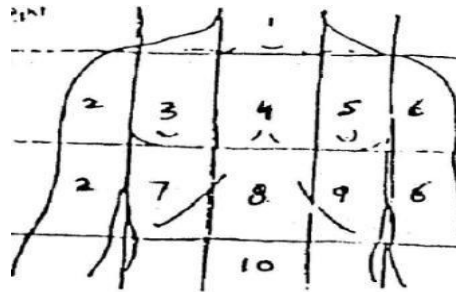

Left

d. ऊपर बताए गए लक्षणों को क्या आपने किसी ओर जगह भी महसूस करते हैं?

हाँ

1

नहीं

2

यदि हाँ विवरण दें।

लक्षण: \_\_\_\_\_

स्थान: \_\_\_\_\_

Fill Q.e to Q.i only if you have noted "1" for any of the symptoms in Q.b and Q.c, OTHERWISE GO TO Q.m

|                                                                                                                                                                                      |                                                             |                  |                                                                                  |
|--------------------------------------------------------------------------------------------------------------------------------------------------------------------------------------|-------------------------------------------------------------|------------------|----------------------------------------------------------------------------------|
| e. जब आप सीढ़ियाँ चढ़ते हैं या चढ़ाई पर चलते हैं या तेज़ चलते हैं तो क्या आपको ऊपर वर्णित कोई लक्षण महसूस होता है या आपकी सांस फूल जाता है या आपको दिल की धड़कन महसूस होने लगती हैं? | हाँ<br>नहीं<br>कभी भी चढ़ाई पर या तेज़ नहीं चलते            | 1<br>2<br>3      | <input type="checkbox"/>                                                         |
| f. क्या इनमें से कोई लक्षण आपको समतल ज़मीन पर सामान्य गति से चलने में भी महसूस होता है?                                                                                              | हाँ<br>नहीं                                                 | 1<br>2           | <input type="checkbox"/>                                                         |
| g. आप सामान्य तौर पर क्या करते हैं यदि इनमें से कोई लक्षण आपको परिश्रम करने के दौरान महसूस होता है?                                                                                  | हाँ<br>नहीं                                                 | 1<br>2           | <input type="checkbox"/>                                                         |
| h. क्या इनमें से कोई लक्षण आपको आराम करते समय या खाना खाने के बाद महसूस होता है?                                                                                                     | रुक जाते हैं<br>धीरे चलते हैं<br>उसी गति से चलते रहते हैं   | 1<br>2<br>3      | <input type="checkbox"/>                                                         |
| i. यदि उस समय आप रुक जाते हैं या धीरे चलते रहते हैं तो क्या लक्षण खत्म हो जाते?                                                                                                      | हाँ<br>नहीं                                                 | 1<br>2           | <input type="checkbox"/><br>"2" go to Q.k                                        |
| j. प्र. (i) का उत्तर "हाँ" में है तो सामान्यतः लक्षण कितनी देर में खत्म हो जाते हैं?                                                                                                 | < 3 mins<br>3-20 mts<br>>20 mts                             | 1<br>2<br>3      | <input type="checkbox"/>                                                         |
| k. क्या आप सामान्यतः लक्षणों से आराम पाने के लिए जीभ के नीचे कोई दवाई रखते हैं?                                                                                                      | हाँ<br>नहीं                                                 | 1<br>2           | <input type="checkbox"/><br>"2" go to Q.m                                        |
| l. यदि हाँ तो कितनी देर में आराम मिलता है?                                                                                                                                           | < 2mts<br>2-5 mts<br>6-10 mts<br>>10 mts                    | 1<br>2<br>3<br>4 | <input type="checkbox"/>                                                         |
| m. क्या कभी आपने सीने में (छाती के सामने के हिस्से में) तेज़ दर्द या बेचैनी महसूस की है, जो कि लगातार आधा घंटा या ज़्यादा समय तक बनी रही हो?                                         | हाँ<br>नहीं                                                 | 1<br>2           | <input type="checkbox"/><br>"2", go to the next section                          |
| n. यदि हाँ तो दर्द और बेचैनी के साथ इनमें से कई अन्यलक्षण होते हैं -<br><b>[Yes=1; No=2]</b>                                                                                         | ठंडे पसीने आना<br>सांस लने में परेशानी<br>ज़्यादा पसीने आना |                  | <input type="checkbox"/><br><input type="checkbox"/><br><input type="checkbox"/> |
| o. जब आपको सबसे पहली बार छाती में दर्द हुआ था तब आपकी उम्र क्या थी?                                                                                                                  | Years <input type="text"/> <input type="text"/>             |                  |                                                                                  |
| p. आपको इस प्रकार के कितने अटैक आ चुके हैं?                                                                                                                                          |                                                             |                  | <input type="text"/> <input type="text"/>                                        |
| q. क्या आपने कभी ECG कराई है?                                                                                                                                                        | हाँ<br>नहीं                                                 | 1<br>2           | <input type="checkbox"/>                                                         |

|                                                          |      |   |                          |
|----------------------------------------------------------|------|---|--------------------------|
| r. क्या आपने छाती में दर्द के कारण डाक्टर की सलाह ली है? | हाँ  | 1 | <input type="checkbox"/> |
|                                                          | नहीं | 2 |                          |

### II. परिधीय नीड्री संबधी बीमारी (परीफल वैस्कूलर डिज़ीज)

|                                                                            |                                                                           |             |                                                           |
|----------------------------------------------------------------------------|---------------------------------------------------------------------------|-------------|-----------------------------------------------------------|
| a. क्या चलते समय आपकी एक या दोनो टांगो में दर्द होता है?                   | हाँ<br>नहीं                                                               | 1<br>2      | <input type="checkbox"/><br><b>"2" go to the Part III</b> |
| b. यदि हाँ तो आप अपनी टांग के किस भाग में दर्द महसूस करते हैं?             | पिंडली के दर्द को शामिल करते हैं<br>पिंडली के दर्द को शामिल नहीं करते हैं | 1<br>2      | <input type="checkbox"/><br><b>"2" go to the Part III</b> |
| c. क्या यह दर्द सीढ़ियाँ चढ़ते समय या तेज़ चलते समय होता है?               | हाँ<br>नहीं<br>लागू नहीं                                                  | 1<br>2<br>3 | <input type="checkbox"/><br><b>"2" go to the Part III</b> |
| d. क्या यह दर्द तब भी होता है जब आप समतल ज़मीन पर सामान्य गति से चलते हैं? | हाँ<br>नहीं                                                               | 1<br>2      | <input type="checkbox"/>                                  |
| e. क्या आपको कभी इस दर्द से चलते चलते राहत मिल जाती है?                    | हाँ<br>नहीं                                                               | 1<br>2      | <input type="checkbox"/><br><b>"1" go to the Part III</b> |
| f. जब चलते समय आपको दर्द होता है तब आप क्या करते हैं?                      | रुक जाते हैं<br>चलते रहते हैं                                             | 1<br>2      | <input type="checkbox"/><br><b>"2" go to the Part III</b> |
| g. तब क्या होता है जब आप चलते-चलते रुक जाते हैं?                           | आराम मिलता है<br>आराम नहीं मिलता है                                       | 1<br>2      | <input type="checkbox"/><br><b>"2" go to the Part III</b> |
| h. यदि आराम मिलता है तो कितने समय में मिलता है?                            | 10 मिनट या कम<br>10 मिनट से ज़्यादा                                       | 1<br>2      | <input type="checkbox"/>                                  |

### III. हृदय गति का रुकना (हार्टफेलयर)

|                                                                                                       |             |        |                                                     |
|-------------------------------------------------------------------------------------------------------|-------------|--------|-----------------------------------------------------|
| a. क्या आप शारिरीक अपंगता के कारण चलने में असमर्थ हैं?                                                | हाँ<br>नहीं | 1<br>2 | <input type="checkbox"/><br><b>"1" skip to Q. e</b> |
| b. जब आप अपने हमउम्र के लोगों के साथ समतल ज़मीन पर चलते हैं तो क्या आपकी सांस फूलने लगती है?          | हाँ<br>नहीं | 1<br>2 | <input type="checkbox"/>                            |
| c. जब आप चढ़ाई या सीढ़ियाँ चढ़ते हैं तो अपने हमउम्र के लोगों की अपेक्षा आपकी सांस अधिक फूलने लगती है? | हाँ<br>नहीं | 1<br>2 | <input type="checkbox"/><br><b>"2" go to Q. e</b>   |
| d. क्या आपको कभी सांस फूलने के कारण चलते-चलते रुकना पड़ा है?                                          | हाँ<br>नहीं | 1<br>2 | <input type="checkbox"/>                            |
| e. बीते सालों में सांस ठीक से न आने के कारण क्या आप किसी समय नींद से जागे हैं?                        | हाँ<br>नहीं | 1<br>2 | <input type="checkbox"/><br><b>"2" go to Q. g</b>   |

|                                                                                                     |                                                                     |   |                          |
|-----------------------------------------------------------------------------------------------------|---------------------------------------------------------------------|---|--------------------------|
| f. आपको ये समस्या कितने दिनों से है?                                                                | एक साल से कम                                                        | 1 | <input type="checkbox"/> |
|                                                                                                     | एक साल से अधिक                                                      | 2 |                          |
| g. क्या आपके टक्खनों (रेंगकल) में सूजन है?                                                          | हाँ                                                                 | 1 | <input type="checkbox"/> |
|                                                                                                     | नहीं                                                                | 2 |                          |
| h. क्या डॉक्टर ने आपको कभी यह बताया है कि आपको फेंफड़ों से संबंधित कोई बीमारी है (COPD, अस्थमा आदि) | हाँ                                                                 | 1 | <input type="checkbox"/> |
|                                                                                                     | नहीं                                                                | 2 |                          |
| i. क्या आपके शरीर में कोई हृदययंत्र लगा हुआ है?                                                     | हाँ                                                                 | 1 | <input type="checkbox"/> |
|                                                                                                     | नहीं                                                                | 2 |                          |
| j. यदि हां तो यंत्र का नाम बबताइए?                                                                  | सामान्य गतिनिर्धारक (स्टैन्डर्ड पैस्मेकर)                           | 1 | <input type="checkbox"/> |
|                                                                                                     | इम्प्लैन्टेबल कार्डियोवर्टर डेफीब्रिलेटर (ICD)                      | 2 |                          |
|                                                                                                     | कार्डीएक रिसिनक्रोनाइसेशन थैरेपी डिवाइस डेफीब्रिलेटर के साथ (CRT-D) | 3 |                          |
|                                                                                                     | कार्डीएक रिसिनक्रोनाइसेशन थैरेपी डिवाइस डेफीब्रिलेटर रहित (CRT-P)   | 4 |                          |

**PART - D: काम्प्लीकेशन**

यदि आपने Part -B को भरा है तो निम्नलिखित section को पूरा किजिए !

**I. पांव को फोडा (पांव का अहसर) (फुट अहसर) और ऐम्पुटेशन (अंगोच्छेदन)**

|                                                                                                      |                                                                                                                  |   |                          |
|------------------------------------------------------------------------------------------------------|------------------------------------------------------------------------------------------------------------------|---|--------------------------|
| a. क्या आपको कभी पांव के न भरने वाला फोडा या घाव हुआ है जिसके भरने में 4 हफ्ते से ज्यादा समय लगा हो? | हाँ                                                                                                              | 1 | <input type="checkbox"/> |
|                                                                                                      | नहीं                                                                                                             | 2 |                          |
| b. क्या आप यहां वहां नंगे पैर चले हैं?                                                               | हाँ                                                                                                              | 1 | <input type="checkbox"/> |
|                                                                                                      | नहीं                                                                                                             | 2 |                          |
| c. क्या आपने कभी ऐम्पुटेशन (अंगोच्छेदन) करवाया है?                                                   | हाँ                                                                                                              | 1 | <input type="checkbox"/> |
|                                                                                                      | नहीं                                                                                                             | 2 |                          |
| d. यदि हां तो कब                                                                                     | वर्षों पहले <input type="text"/> <input type="text"/> (या) महीनों पहले <input type="text"/> <input type="text"/> |   | <b>"2" go to Part II</b> |
| e. ऐम्पुटेशन (अंगोच्छेदन) का स्तर पंजा (अंगोच्छेदन)                                                  | पांव का अंगूठा                                                                                                   | 1 | <input type="checkbox"/> |
|                                                                                                      | टक्खने के नीचे                                                                                                   | 2 |                          |
|                                                                                                      | घुटने के नीचे                                                                                                    | 3 |                          |
|                                                                                                      | घुटने के ऊपर                                                                                                     | 4 |                          |
| f. ऐम्पुटेशन (अंगोच्छेदन) का कारण क्या था?                                                           | जख्म (चोट)                                                                                                       | 1 | <input type="checkbox"/> |
|                                                                                                      | मधुमेह                                                                                                           | 2 |                          |
|                                                                                                      | संकमण                                                                                                            | 3 |                          |

अन्य, विवरण दें।  
\_\_\_\_\_

|                                                                                                                                                                                                                                                                                                    |                                                                                                                                                                                                                                                                |             |                                                                                  |
|----------------------------------------------------------------------------------------------------------------------------------------------------------------------------------------------------------------------------------------------------------------------------------------------------|----------------------------------------------------------------------------------------------------------------------------------------------------------------------------------------------------------------------------------------------------------------|-------------|----------------------------------------------------------------------------------|
|                                                                                                                                                                                                                                                                                                    | अन्य                                                                                                                                                                                                                                                           | 4           |                                                                                  |
| g. क्या आपके पास चिकित्सीय विवरण या औषध-निधि है?                                                                                                                                                                                                                                                   | हाँ<br>नहीं<br>पता नहीं                                                                                                                                                                                                                                        | 1<br>2<br>3 | <input type="checkbox"/>                                                         |
| h. यदि उत्तर हां में है तो प्रतिभागी से चिकित्सीय विवरण दिखाने के लिए कहिए और नीचे रोग-निदान लिखिए!                                                                                                                                                                                                |                                                                                                                                                                                                                                                                |             |                                                                                  |
| <b>II. आँखें</b>                                                                                                                                                                                                                                                                                   |                                                                                                                                                                                                                                                                |             |                                                                                  |
| a. क्या आपको चश्मा लगाने के अलावा अपनी नेत्र दृष्टि में कोई परेशानी है?                                                                                                                                                                                                                            | हाँ<br>नहीं                                                                                                                                                                                                                                                    | 1<br>2      | <input type="checkbox"/><br><b>"2" skip the section</b>                          |
| b. यदि हाँ तो क्या आपको डॉक्टर ने कहाँ है कि आपकी कमजोर नेत्र दृष्टि मधुमेह की समस्या के कारण है?                                                                                                                                                                                                  | हाँ<br>नहीं                                                                                                                                                                                                                                                    | 1<br>2      | <input type="checkbox"/><br><b>"2" skip the section</b>                          |
| c. यदि हाँ तो क्या रोग-निदान था?                                                                                                                                                                                                                                                                   |                                                                                                                                                                                                                                                                |             |                                                                                  |
| d. क्या आप किसी समय लेज़र थेरपी से गुजरे हैं?                                                                                                                                                                                                                                                      | हाँ<br>नहीं                                                                                                                                                                                                                                                    | 1<br>2      | <input type="checkbox"/>                                                         |
| e. क्या आपके पास किडनी संबंधी बीमारी का चिकित्सीय विवरण या औषध विधि है?                                                                                                                                                                                                                            | हाँ<br>नहीं<br>पता नहीं                                                                                                                                                                                                                                        | 1<br>2<br>3 | <input type="checkbox"/>                                                         |
| f. यदि उत्तर हाँ है तो प्रतिभागी से चिकित्सीय विवरण दिखाने को कहिए और नीचे रोग निदान लिखिए?                                                                                                                                                                                                        |                                                                                                                                                                                                                                                                |             |                                                                                  |
| <b>PART - E: श्वास संबंधी बीमारी (रेस्पिरेटरी डिजीज)</b>                                                                                                                                                                                                                                           |                                                                                                                                                                                                                                                                |             |                                                                                  |
| 1- पिछले 12 महीनों के अंदर हफ्ते में, अधिकतम दिन या रात में (लगातार कम से कम 3 महीनों के दौरान) क्या आपको दीर्घस्थायी कफ और बलगम की उत्पत्ति हुई है? [ नहीं = 1; नहीं = 2]<br>कफ से तात्पर्य है कि केवल आप जुकाम से ही पीड़ित नहीं है!<br>अधिकतम से तात्पर्य है कम से कम 4 दिन या रात प्रतिसप्ताह! |                                                                                                                                                                                                                                                                |             | <input type="checkbox"/>                                                         |
| a. यदि हाँ                                                                                                                                                                                                                                                                                         | i. पिछले 12 महिनो में इस तरह के कफ ने आपको कितनी बार परेशान किया ?<br>ii. पिछले वर्ष क्या आप किसी ऐसे संक्रमण से पीड़ित थे जिसके लिए आपको चिकित्सीय देख-रेख की आवश्यकता थी?<br>iii. पिछले 12 महिनो में क्या आपको कितनी बार चिकित्सीय देख-रेख की आवश्यकता पड़ी? |             | <input type="checkbox"/><br><input type="checkbox"/><br><input type="checkbox"/> |
| 2. पिछले 12 महिनो में क्या आप छाती के संक्रमण (पैस्ट इनफेक्शन) (टी. बी. छोडकर रहित) के लिए डॉक्टर या स्वास्थ्य चिकित्सक से मिले है? [हाँ=1; नहीं=2]                                                                                                                                                |                                                                                                                                                                                                                                                                |             | <input type="checkbox"/>                                                         |



|                                                                                                                            |                                                                                                                                                                                                                                                                           |                                                                                                                                                                                                                                   |
|----------------------------------------------------------------------------------------------------------------------------|---------------------------------------------------------------------------------------------------------------------------------------------------------------------------------------------------------------------------------------------------------------------------|-----------------------------------------------------------------------------------------------------------------------------------------------------------------------------------------------------------------------------------|
| <p>a. यदि हाँ</p>                                                                                                          | <p>i. पिछले 12 महिनों में कितनी बार डॉक्टर से मिलें?<br/> ii. डॉक्टर ने निदान कितनी बार किया?<br/> iii. यह संक्रमण कितने समय तक रहा?<br/> iv. क्या आने इन संक्रमणों के लिए एन्टाइबाइोटिक दवाइयों का सेवन किया था?<br/> <b>[हाँ=1; नहीं=2]</b></p>                         | <p><input type="text"/> <input type="text"/></p> <p><input type="text"/> <input type="text"/></p> <p>Yrs <input type="text"/> <input type="text"/> Mnts <input type="text"/> <input type="text"/></p> <p><input type="text"/></p> |
| <p>3. पिछले 12 महिनों में क्या आप छाती के संक्रमण या निमोनिया के लिए अस्पताल में भर्ती थे?<br/> <b>[हाँ=1; नहीं=2]</b></p> |                                                                                                                                                                                                                                                                           | <p><input type="text"/></p>                                                                                                                                                                                                       |
| <p>a. यदि हाँ, रूकने की अवधि!</p>                                                                                          |                                                                                                                                                                                                                                                                           | <p><input type="text"/> <input type="text"/> दिन<br/> <input type="text"/> <input type="text"/> हफ्ते<br/> <input type="text"/> <input type="text"/> महिने</p>                                                                    |
| <p>4. क्या आप वर्तमान में दम से पीड़ित हैं?<br/> <b>[हाँ=1; नहीं=2]</b></p>                                                |                                                                                                                                                                                                                                                                           | <p><input type="text"/></p>                                                                                                                                                                                                       |
| <p>a. यदि हाँ</p>                                                                                                          | <p>i. पिछले 12 महिनों में आपको कितनी बार अस्थमें/दमे का अटैक आया है?<br/> ii. पिछले वर्ष क्या आप किसी ऐसे संक्रमण से पीड़ित है जिसके लिए आपको चिकित्सीय देख-रेख की आवश्यकता थी?<br/> iii. पिछले 12 महिनों में क्या आपको कितनी बार चिकित्सीय देख-रेख की आवश्यकता पड़ी?</p> | <p><input type="text"/> <input type="text"/></p> <p><input type="text"/></p> <p><input type="text"/> <input type="text"/></p>                                                                                                     |

**PART - F: फैमली हिस्ट्री (परिवार का विवरण)**

|                                                                                                                                                               |                                                                                                                      |                                                                                                                 |                                       |
|---------------------------------------------------------------------------------------------------------------------------------------------------------------|----------------------------------------------------------------------------------------------------------------------|-----------------------------------------------------------------------------------------------------------------|---------------------------------------|
| <p>1. क्या आपके परिवार मे से कोई भी 60 साल की उम्र से पहले नित्नालिखित बीमारीयों में से किसी बीमारी से पीड़ित था?<br/> <b>[हाँ=1; नहीं=2; पता नहीं=3]</b></p> | <p>उच्चरक्तचाप<br/> हृदय रोग*<br/> मधुमेह<br/> घात (लकवे का अटैक)<br/> *एन्जाइना, दिल का दौरा, हृदय गति का स्कना</p> | <p><input type="text"/></p> <p><input type="text"/></p> <p><input type="text"/></p> <p><input type="text"/></p> |                                       |
| <p>2. नीचे दी गई तालिका भरें</p>                                                                                                                              |                                                                                                                      |                                                                                                                 |                                       |
| <p>परिवार के सदस्यों से संबंध</p>                                                                                                                             | <p>रोग के प्रकार (नीचे दी गए कोड से उल्लेख)</p>                                                                      | <p>उम्र निदान के समय (वर्षों में)</p>                                                                           | <p>यदि मृत्यु हुई तो किस उम्र में</p> |
| <p>पिता</p>                                                                                                                                                   |                                                                                                                      |                                                                                                                 |                                       |
| <p>माता</p>                                                                                                                                                   |                                                                                                                      |                                                                                                                 |                                       |
| <p>पुत्र</p>                                                                                                                                                  |                                                                                                                      |                                                                                                                 |                                       |



|                                                                         |  |  |  |
|-------------------------------------------------------------------------|--|--|--|
| पुत्री                                                                  |  |  |  |
| दादा                                                                    |  |  |  |
| दादी                                                                    |  |  |  |
| नाना                                                                    |  |  |  |
| नानी                                                                    |  |  |  |
| भाई                                                                     |  |  |  |
| बहन                                                                     |  |  |  |
| चाचा                                                                    |  |  |  |
| चाची                                                                    |  |  |  |
| मामा                                                                    |  |  |  |
| मामी                                                                    |  |  |  |
| <b>अन्य के लिए कृपया प्रतिभागी का संबंध और आवश्यक विवरण नीचे लिखें।</b> |  |  |  |
|                                                                         |  |  |  |
|                                                                         |  |  |  |
|                                                                         |  |  |  |
|                                                                         |  |  |  |
|                                                                         |  |  |  |
|                                                                         |  |  |  |

\* रोग की दशा (स्थिति): मधुमेह = 1, हृदय रोग = 2, उच्चरक्तचाप = 3, घात (लकवे का अटैक) = 4

### SECTION - 6: इलाज ( चिकित्सा ) का विवरण और खर्च (प्यय)

#### PART A: बाहरी रोगी

1. क्या आप निम्नलिखित में से किसी कारण के लिए बाहरी ( बाह्य ) रोगी के रूप में इलाज करा रहे हैं?

[Yes=1; No=2]

हृदय रोग  
लकवा  
मधुमेह  
मधुमेह पेयीदगी (संक्रमण, रेटिनोपैथी, येफोपैथी आदि)  
उच्चरक्तचाप  
किडनी डिजीज

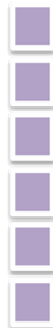

यदि ऊपर दिए गए विकल्पों में से किसी का उत्तर हाँ में है, तो अगले भाग में जाए अन्यथा भाग- 8 छोड़ दें।

निम्नलिखित प्रश्नों में केवल पिछले 12 महीनों के लिए प्रतिभागी के इलाज का विवरण और खर्च के बारे में पूछिए।

|                                                                                                    |                                           |                  |
|----------------------------------------------------------------------------------------------------|-------------------------------------------|------------------|
| 2. पिछले 12 महीनों में आपने कितनी बार चिकित्सीय सुविधा/डॉक्टर/ थेरेपिस्ट का दौरा किया?             | <input type="text"/> <input type="text"/> |                  |
| 3. चिकित्सीय सुविधा/डॉक्टर/थेरेपिस्ट के प्रकार सरकारी, गैर सरकारी धर्मार्थ संगठन, अन्य (विवरण दें) | सरकारी<br>गैर-सरकारी<br>धर्मार्थ<br>अन्य  | 1<br>2<br>3<br>4 |

अन्य, विवरण दें।

4. प्रत्येक तालिका में पृथक-पृथक ऊपर उल्लिखित बीमारियों (प्र0 -1 ) के खर्चों का सूचीबद्ध कीजिए!

4.i. रोग \_\_\_\_\_

| व्यय का स्वरूप                                                                           | आवृत्ति | कुल प्रयुक्त राशि ₹0 में प्रति दौरा/ जांच/ वेतन (गृह नर्स या देख रेख करने वाले के लिए) |
|------------------------------------------------------------------------------------------|---------|----------------------------------------------------------------------------------------|
| डॉक्टर के पास दौरा लगाया (फीस)                                                           |         |                                                                                        |
| नर्स या देख रेख करने वाले का किराये पर रखना (महीने में)                                  |         |                                                                                        |
| जांच                                                                                     |         |                                                                                        |
| शारीरिक या व्यवसायिक पुनःस्थापन                                                          |         |                                                                                        |
| अन्य (विवरण दें) _____                                                                   |         |                                                                                        |
| दवाईया, (पिछले 12 महीनों में ऊपर दी गई उल्लिखित बीमारियों के लिए औसतन कुल प्रयुक्त राशि) |         |                                                                                        |
| <b>पिछले 12 महीनों में कुल व्यय</b>                                                      |         |                                                                                        |

4.ii. रोग \_\_\_\_\_

| व्यय का स्वरूप                                                                           | आवृत्ति | कुल प्रयुक्त राशि ₹0 में प्रति दौरा/ जांच/ वेतन (गृह नर्स या देख रेख करने वाले के लिए) |
|------------------------------------------------------------------------------------------|---------|----------------------------------------------------------------------------------------|
| डॉक्टर के पास दौरा लगाया (फीस)                                                           |         |                                                                                        |
| नर्स या देख रेख करने वाले का किराये पर रखना (महीने में)                                  |         |                                                                                        |
| जांच                                                                                     |         |                                                                                        |
| शारीरिक या व्यवसायिक पुनःस्थापन                                                          |         |                                                                                        |
| अन्य (विवरण दें) _____                                                                   |         |                                                                                        |
| दवाईया, (पिछले 12 महीनों में ऊपर दी गई उल्लिखित बीमारियों के लिए औसतन कुल प्रयुक्त राशि) |         |                                                                                        |
| <b>पिछले 12 महीनों में कुल व्यय</b>                                                      |         |                                                                                        |



4.iii. रोग \_\_\_\_\_

| व्यय का स्वरूप                                                                           | आवृत्ति | कुल प्रयुक्त राशि ₹0 में प्रति दौरा/ जांच/ वेतन (गृह नर्स या देख रेख करने वाले के लिए) |
|------------------------------------------------------------------------------------------|---------|----------------------------------------------------------------------------------------|
| डॉक्टर के पास दौरा लगाया (फीस)                                                           |         |                                                                                        |
| नर्स या देख रेख करने वाले का किराये पर रखना (महीने में)                                  |         |                                                                                        |
| जांच                                                                                     |         |                                                                                        |
| शारीरिक या व्यवसायिक पुनःस्थापन                                                          |         |                                                                                        |
| अन्य (विवरण दें) _____                                                                   |         |                                                                                        |
| दवाईया, (पिछले 12 महीनों में ऊपर दी गई उल्लिखित बीमारियों के लिए औसतन कुल प्रयुक्त राशि) |         |                                                                                        |
| <b>पिछले 12 महीनों में कुल व्यय</b>                                                      |         |                                                                                        |

4.iv. रोग \_\_\_\_\_

| व्यय का स्वरूप                                                                           | आवृत्ति | कुल प्रयुक्त राशि ₹0 में प्रति दौरा/ जांच/ वेतन (गृह नर्स या देख रेख करने वाले के लिए) |
|------------------------------------------------------------------------------------------|---------|----------------------------------------------------------------------------------------|
| डॉक्टर के पास दौरा लगाया (फीस)                                                           |         |                                                                                        |
| नर्स या देख रेख करने वाले का किराये पर रखना (महीने में)                                  |         |                                                                                        |
| जांच                                                                                     |         |                                                                                        |
| शारीरिक या व्यवसायिक पुनःस्थापन                                                          |         |                                                                                        |
| अन्य (विवरण दें) _____                                                                   |         |                                                                                        |
| दवाईया, (पिछले 12 महीनों में ऊपर दी गई उल्लिखित बीमारियों के लिए औसतन कुल प्रयुक्त राशि) |         |                                                                                        |
| <b>पिछले 12 महीनों में कुल व्यय</b>                                                      |         |                                                                                        |

|                                                                                                    |                                                   |                                             |                          |
|----------------------------------------------------------------------------------------------------|---------------------------------------------------|---------------------------------------------|--------------------------|
| 5. क्या आपको बीमा से कोई क्षतिपूर्ति मिला?                                                         | हाँ<br>नहीं<br>जानते नहीं<br>कोई बीमा नहीं करवाया | 1<br>2<br>3<br>4                            | <input type="checkbox"/> |
| 6. यदि हाँ तो ऊपर उल्लिखित खर्चों में कितनी क्षतिपूर्ति मिली ( ₹0 में)                             | RS _____                                          |                                             |                          |
| 7. चिकित्सीय सुविधा/डॉक्टर/ थेरेपिस्ट के पास पहुँचने में जिया गया समय ----                         |                                                   | <input type="text"/> : <input type="text"/> | घंटें      मिनट          |
| 8. ऊपर दी गई उल्लिखित चिकित्सीय सुविधा/डॉक्टर/थेरेपिस्ट का दौरा करने के लिए परिवहन लागत*           | RS _____                                          |                                             |                          |
| *यदि प्रतिभागी के पास अपना वाहन है तो उससे कहिए की यात्रा में प्रयुक्त ईंधन का अनुमानित खर्च बताए! |                                                   |                                             |                          |

|                                                                                                                 |                                                                                                                                                                                                                                                                                                                                                                                           |                                                                                                                                                                                                  |
|-----------------------------------------------------------------------------------------------------------------|-------------------------------------------------------------------------------------------------------------------------------------------------------------------------------------------------------------------------------------------------------------------------------------------------------------------------------------------------------------------------------------------|--------------------------------------------------------------------------------------------------------------------------------------------------------------------------------------------------|
| 9. चिकित्सीय सुविधा में प्रयुक्त औसतन समय।                                                                      | <input type="text"/> <input type="text"/> : <input type="text"/> <input type="text"/><br><b>HR MIN</b>                                                                                                                                                                                                                                                                                    |                                                                                                                                                                                                  |
| 10. मैं सही चिकित्सीय सुविधा प्राप्त कर रहा हूँ?                                                                | चिकित्सीय सुविधा प्राप्त करने में आपको क्या रूकावट है? 0<br>उपलब्ध नहीं है 1<br>प्राप्त करने के लिए कोई मदद नहीं करता 2<br>बहुत दूर है 3<br>बहुत खर्चीला है 4<br>खर्च नहीं करना चाहते 5<br>रोगी की असरल चिकित्सा प्रक्रिया 6<br>बहुत अधिक प्रतिक्षा करना 7<br>यात्रा करने में बहुत कमजोर है 8<br>चिकित्सीय देखरेख में विश्वास नहीं 9<br>नहीं जानते कहाँ जाना है 10<br>अन्य (विवरण दें) 11 | <input type="checkbox"/><br><input type="checkbox"/><br><input type="checkbox"/><br><input type="checkbox"/><br>अन्य, विवरण दें।<br><hr/>                                                        |
| 11. आप अपने इलाज और दौरे का भुगतान कैसे करते हैं?<br>[हाँ=1; नहीं=2]                                            | अपनी बचत से 1<br>परिवार के सदस्य भुगतान करते हैं 2<br>नियोक्ता द्वारा भुगतान 3<br>दोस्तों, रिश्तेदारों और नियोक्ता से उधार लेकर बैंक से 4<br>मकान-जमीन या अन्य सम्पत्ति बेचकर 5<br>स्वास्थ्य बीमा द्वारा 6<br>अन्य (विवरण दें) _____ 8                                                                                                                                                    | <input type="checkbox"/><br><input type="checkbox"/><br><input type="checkbox"/><br><input type="checkbox"/><br><input type="checkbox"/><br><input type="checkbox"/><br><input type="checkbox"/> |
| 12. ऊपर उल्लिखित साधनों से आप कि औसतन किस अनुपात में राशि (प्रतिशत में) अपने इलाज और दौरे के लिए खर्च करते हैं? | अपनी बचत से 1<br>परिवार के सदस्य भुगतान करते हैं 2<br>नियोक्ता द्वारा भुगतान 3<br>दोस्तों, रिश्तेदारों और नियोक्ता से उधार लेकर बैंक से से उधार लेकर 4<br>मकान-जमीन या अन्य सम्पत्ति बेचकर 5<br>स्वास्थ्य बीमा द्वारा 6<br>अन्य (विवरण दें) _____ 8                                                                                                                                       | _____%<br>_____%<br>_____%<br>_____%<br>_____%<br>_____%<br>_____%<br>_____%                                                                                                                     |
| <b>PART B: INPATIENT</b>                                                                                        |                                                                                                                                                                                                                                                                                                                                                                                           |                                                                                                                                                                                                  |
| 1. पिछले 12 महीने में किसी बीमारी के लिए क्या आप अस्पताल में भर्ती थे?                                          | हाँ 1<br>नहीं 2<br>याद नहीं 3                                                                                                                                                                                                                                                                                                                                                             | <input type="checkbox"/><br><b>"2" go to Q.4</b>                                                                                                                                                 |

|                                                                                                                                                                                                                            |                                                                                                                                                                                           |                                                                                                                                                                                                                              |                                           |
|----------------------------------------------------------------------------------------------------------------------------------------------------------------------------------------------------------------------------|-------------------------------------------------------------------------------------------------------------------------------------------------------------------------------------------|------------------------------------------------------------------------------------------------------------------------------------------------------------------------------------------------------------------------------|-------------------------------------------|
| 2. यदि हाँ तो कितने समय के लिए?                                                                                                                                                                                            |                                                                                                                                                                                           |                                                                                                                                                                                                                              | <input type="text"/>                      |
| 3. क्या आप निम्नलिखित कारणों में से किसी कारण के लिए अस्पताल में भर्ती थे?<br><br>[हाँ=1; नहीं=2]                                                                                                                          | हृदय रोग<br>लकवा<br>मधुमेह<br>मधुमेह संबंधी जटिलता (संक्रमण, रिटीनोपैथी<br>नेफरोपैथी आदि)<br>उच्च रक्तचाप<br>स्थायी किडनी रोग                                                             | <input type="checkbox"/><br><input type="checkbox"/><br><input type="checkbox"/><br><input type="checkbox"/><br><input type="checkbox"/><br><input type="checkbox"/>                                                         |                                           |
| 4. पिछले 12 महीने में क्या आप किसी शल्य चिकित्सा प्रक्रिया से गुजरे हैं? (यदि नहीं)                                                                                                                                        | हाँ<br>नहीं<br>याद नहीं                                                                                                                                                                   | 1<br>2<br>3                                                                                                                                                                                                                  | <input type="checkbox"/><br>"2" go to Q.6 |
| 5. यदि हाँ तो प्रक्रिया क्या थी?<br><br>[हाँ=1; नहीं=2]                                                                                                                                                                    | रिवेस्क्यूलेराईसेशन/बाईपास<br>वेल्व रिपेयर/रिप्लेसमेंट<br>पैस्मेकर<br>एमप्यूटेशन<br>एक्सश<br>रिनेल ट्रान्सप्लानटेशन<br>हार्ट ट्रान्सप्लानट<br>रिटिनल फोटोकॉग्यूलेशन<br>अन्य (विवरण _____) | <input type="checkbox"/><br><input type="checkbox"/><br><input type="checkbox"/><br><input type="checkbox"/><br><input type="checkbox"/><br><input type="checkbox"/><br><input type="checkbox"/><br><input type="checkbox"/> |                                           |
| 6. क्या आपके पास अस्पताल में भर्ती या शल्य चिकित्सा प्रक्रिया से संबंधित विवरण दे?                                                                                                                                         | हाँ<br>नहीं                                                                                                                                                                               | 1<br>2                                                                                                                                                                                                                       | <input type="checkbox"/>                  |
| यदि उत्तर हाँ में है तो प्रतिभागी को उसके चिकित्सीय विवरण दिखाने के लिए कहिए और बीमारी के कारण अस्पताल में भर्ती की प्रक्रिया और शल्य चिकित्सा प्रक्रिया का अलग-अलग क्रमकाल के अनुसार नीचे दी गई खाली जगह में निदान लिखिए। |                                                                                                                                                                                           |                                                                                                                                                                                                                              |                                           |
| अस्पताल में भर्ती की प्रक्रिया                                                                                                                                                                                             |                                                                                                                                                                                           |                                                                                                                                                                                                                              |                                           |
| <hr/>                                                                                                                                                                                                                      |                                                                                                                                                                                           |                                                                                                                                                                                                                              |                                           |
| <hr/>                                                                                                                                                                                                                      |                                                                                                                                                                                           |                                                                                                                                                                                                                              |                                           |
| <hr/>                                                                                                                                                                                                                      |                                                                                                                                                                                           |                                                                                                                                                                                                                              |                                           |
| <hr/>                                                                                                                                                                                                                      |                                                                                                                                                                                           |                                                                                                                                                                                                                              |                                           |
| <hr/>                                                                                                                                                                                                                      |                                                                                                                                                                                           |                                                                                                                                                                                                                              |                                           |
| शल्य चिकित्सा प्रक्रिया                                                                                                                                                                                                    |                                                                                                                                                                                           |                                                                                                                                                                                                                              |                                           |
| <hr/>                                                                                                                                                                                                                      |                                                                                                                                                                                           |                                                                                                                                                                                                                              |                                           |
| <hr/>                                                                                                                                                                                                                      |                                                                                                                                                                                           |                                                                                                                                                                                                                              |                                           |
| <hr/>                                                                                                                                                                                                                      |                                                                                                                                                                                           |                                                                                                                                                                                                                              |                                           |
| <hr/>                                                                                                                                                                                                                      |                                                                                                                                                                                           |                                                                                                                                                                                                                              |                                           |
| टिप्पणी                                                                                                                                                                                                                    |                                                                                                                                                                                           |                                                                                                                                                                                                                              |                                           |

**PART C: अस्पताल में भर्ती की लागत (खर्च)**

यह भाग केवल जब ही भरिए यदि, प्रतिभागी बीमारी के कारण अस्पताल में भर्ती की प्रक्रिया या प्र0-1 और प्र0-4 (Part -B) में उल्लिखित प्रक्रिया से गुजरे है, अन्यथा साक्षात्कार समाप्त कीजिए और प्रतिभागी को धन्यवाद कहिए!

पिछले 12 महीनों में प्रथम बार अस्पताल में भर्ती होने की प्रक्रिया से शुरूकर प्रत्येक प्रक्रिया का निम्नलिखित विवरण दें। यदि आप अस्पताल में 3 से ज्यादा बार भर्ती हुए हैं तो विवरण को पूर्ण करने के लिए दूसरे फार्म का प्रयोग करें।

| क्र० सं० | प्रश्न                                    | 1                                                                                                                                                              | 2                                                                                                                                                              | 3                                                                                                                                                              |
|----------|-------------------------------------------|----------------------------------------------------------------------------------------------------------------------------------------------------------------|----------------------------------------------------------------------------------------------------------------------------------------------------------------|----------------------------------------------------------------------------------------------------------------------------------------------------------------|
| 1        | आप अस्पताल में भर्ती कब हुए थे?           | महिना <input type="text"/> <input type="text"/>                                                                                                                | महिना <input type="text"/> <input type="text"/>                                                                                                                | महिना <input type="text"/> <input type="text"/>                                                                                                                |
| 2        | आपने अस्पताल में कितने दिन बिताए?         | दिन <input type="text"/> <input type="text"/>                                                                                                                  | दिन <input type="text"/> <input type="text"/>                                                                                                                  | दिन <input type="text"/> <input type="text"/>                                                                                                                  |
| 3        | अस्पताल का स्वरूप?<br><br>[हाँ=1; नहीं=2] | सरकारी <input type="checkbox"/><br>गैर सरकारी <input type="checkbox"/><br>धर्मार्थ संगठन <input type="checkbox"/><br>अन्य (विवरण दें) <input type="checkbox"/> | सरकारी <input type="checkbox"/><br>गैर सरकारी <input type="checkbox"/><br>धर्मार्थ संगठन <input type="checkbox"/><br>अन्य (विवरण दें) <input type="checkbox"/> | सरकारी <input type="checkbox"/><br>गैर सरकारी <input type="checkbox"/><br>धर्मार्थ संगठन <input type="checkbox"/><br>अन्य (विवरण दें) <input type="checkbox"/> |
| 4        | अस्पताल का नाम-<br>पता                    |                                                                                                                                                                |                                                                                                                                                                |                                                                                                                                                                |

|    |                                                                                                                                                                                   |                                                                                                                                                                                                                                                                                                                                                 |                                                                                                                                                                                                                                                                                                                                                 |                                                                                                                                                                                                                                                                                                                                                 |
|----|-----------------------------------------------------------------------------------------------------------------------------------------------------------------------------------|-------------------------------------------------------------------------------------------------------------------------------------------------------------------------------------------------------------------------------------------------------------------------------------------------------------------------------------------------|-------------------------------------------------------------------------------------------------------------------------------------------------------------------------------------------------------------------------------------------------------------------------------------------------------------------------------------------------|-------------------------------------------------------------------------------------------------------------------------------------------------------------------------------------------------------------------------------------------------------------------------------------------------------------------------------------------------|
| 5  | <p>आप किस प्रकार के इलाज/प्रक्रिया/शल्य चिकित्सा से गुजरे हैं?</p> <p><b>(चिकित्सीय विवरण के साथ क्रॉस चैक कीजिए और Part -A से सूचना लीजिए)</b></p> <p><b>[हाँ=1; नहीं=2]</b></p> | <p>दवाईयों</p> <p>थ्रोम्बोलिसिस</p> <p>एन्जीयोग्राम</p> <p>एन्जीयोप्लास्टी</p> <p>बाईपास सर्जरी</p> <p>ब्रेकीथैरेपी</p> <p>पैस्मेकर</p> <p>हार्ट ट्रांसप्लान्ट</p> <p>एमप्यूटेशन</p> <p>इकोकार्डियोग्रफी</p> <p>न्यूरो इमेजिंग</p> <p>डॉयलिसिस</p> <p>किडनी ट्रांसप्लान्ट</p> <p>आब्ज़र्वेशन के लिए</p> <p>अन्य प्रोसीजर</p> <p>विवरण _____</p> | <p>दवाईयों</p> <p>थ्रोम्बोलिसिस</p> <p>एन्जीयोग्राम</p> <p>एन्जीयोप्लास्टी</p> <p>बाईपास सर्जरी</p> <p>ब्रेकीथैरेपी</p> <p>पैस्मेकर</p> <p>हार्ट ट्रांसप्लान्ट</p> <p>एमप्यूटेशन</p> <p>इकोकार्डियोग्रफी</p> <p>न्यूरो इमेजिंग</p> <p>डॉयलिसिस</p> <p>किडनी ट्रांसप्लान्ट</p> <p>आब्ज़र्वेशन के लिए</p> <p>अन्य प्रोसीजर</p> <p>विवरण _____</p> | <p>दवाईयों</p> <p>थ्रोम्बोलिसिस</p> <p>एन्जीयोग्राम</p> <p>एन्जीयोप्लास्टी</p> <p>बाईपास सर्जरी</p> <p>ब्रेकीथैरेपी</p> <p>पैस्मेकर</p> <p>हार्ट ट्रांसप्लान्ट</p> <p>एमप्यूटेशन</p> <p>इकोकार्डियोग्रफी</p> <p>न्यूरो इमेजिंग</p> <p>डॉयलिसिस</p> <p>किडनी ट्रांसप्लान्ट</p> <p>आब्ज़र्वेशन के लिए</p> <p>अन्य प्रोसीजर</p> <p>विवरण _____</p> |
| 6  | इलाज पर प्रयुक्त कुल राशि (अस्पताल में भर्ती होने का खर्च, अस्पताल में यकने के दौरान खरीदी गई दवाईयों)                                                                            | Rs _____                                                                                                                                                                                                                                                                                                                                        | Rs _____                                                                                                                                                                                                                                                                                                                                        | Rs _____                                                                                                                                                                                                                                                                                                                                        |
| 7  | अस्पताल में सहायक (एटेन्डेंट) ने आपके साथ कितने दिन बिताये                                                                                                                        | दिन <input type="text"/> <input type="text"/>                                                                                                                                                                                                                                                                                                   | दिन <input type="text"/> <input type="text"/>                                                                                                                                                                                                                                                                                                   | दिन <input type="text"/> <input type="text"/>                                                                                                                                                                                                                                                                                                   |
| 8  | सहायक के रुकने की लागत (खाना, आवास सुविधा और यात्रा)                                                                                                                              | Rs _____                                                                                                                                                                                                                                                                                                                                        | Rs _____                                                                                                                                                                                                                                                                                                                                        | Rs _____                                                                                                                                                                                                                                                                                                                                        |
| 9  | घर से अस्पताल तक की दूरी।                                                                                                                                                         | Kms <input type="text"/> <input type="text"/> <input type="text"/>                                                                                                                                                                                                                                                                              | Kms <input type="text"/> <input type="text"/> <input type="text"/>                                                                                                                                                                                                                                                                              | Kms <input type="text"/> <input type="text"/> <input type="text"/>                                                                                                                                                                                                                                                                              |
| 10 | घर से अस्पताल तक का यात्रा खर्च। (रेम्बुलेन्स का खर्च अलग से, यदि कोई है)।                                                                                                        | Rs _____                                                                                                                                                                                                                                                                                                                                        | Rs _____                                                                                                                                                                                                                                                                                                                                        | Rs _____                                                                                                                                                                                                                                                                                                                                        |



|    |                                                                                                                            |                                                                                                                                                                                                                                                                                                                      |                                                                                                                                                                                                                                                                                                                      |                                                                                                                                                                                                                                                                                                                      |
|----|----------------------------------------------------------------------------------------------------------------------------|----------------------------------------------------------------------------------------------------------------------------------------------------------------------------------------------------------------------------------------------------------------------------------------------------------------------|----------------------------------------------------------------------------------------------------------------------------------------------------------------------------------------------------------------------------------------------------------------------------------------------------------------------|----------------------------------------------------------------------------------------------------------------------------------------------------------------------------------------------------------------------------------------------------------------------------------------------------------------------|
| 11 | आपने किस प्रकार का<br>मैडिकल बीमा करवाया<br>है!<br>[हाँ=1; नहीं=2]                                                         | मुफ़्त मैडिकल<br>इलाज<br>अवसायिक<br>बीमा<br>कोई नहीं<br>स्वयं भुगतान<br>अन्य<br>(_____)                                                                                                                                                                                                                              | मुफ़्त मैडिकल<br>इलाज<br>अवसायिक<br>बीमा<br>कोई नहीं<br>स्वयं भुगतान<br>अन्य<br>(_____)                                                                                                                                                                                                                              | मुफ़्त मैडिकल<br>इलाज<br>अवसायिक<br>बीमा<br>कोई नहीं<br>स्वयं भुगतान<br>अन्य<br>(_____)                                                                                                                                                                                                                              |
| 12 | स्वास्थ्य बीमा से कुल<br>से कुल राशि की<br>क्षतिपूर्ति, यदि कोई हो!                                                        | Rs _____                                                                                                                                                                                                                                                                                                             | Rs _____                                                                                                                                                                                                                                                                                                             | Rs _____                                                                                                                                                                                                                                                                                                             |
| 13 | आप अस्पताल में भर्ती की<br>लागत का कैसे भुगतान<br>करते हैं<br>[हाँ=1; नहीं=2]                                              | अपनी बचत से<br>परिवार के सदस्य<br>भुगतान करते हैं<br>नियोक्ता द्वारा भुगतान<br>दोस्तों, रिश्तेदारों और<br>नियोक्ता से उधार लेकर<br>बैंक से से उधार लेकर<br>मकान-जमीन या अन्य<br>सम्पत्ति बेचकर<br>स्वास्थ्य बीमा द्वारा<br>अन्य (विवरण दें)<br>_____                                                                 | अपनी बचत से<br>परिवार के सदस्य<br>भुगतान करते हैं<br>नियोक्ता द्वारा भुगतान<br>दोस्तों, रिश्तेदारों और<br>नियोक्ता से उधार लेकर<br>बैंक से से उधार लेकर<br>मकान-जमीन या अन्य<br>सम्पत्ति बेचकर<br>स्वास्थ्य बीमा द्वारा<br>अन्य (विवरण दें)<br>_____                                                                 | अपनी बचत से<br>परिवार के सदस्य भुगतान<br>करते हैं<br>नियोक्ता द्वारा भुगतान<br>दोस्तों, रिश्तेदारों और<br>नियोक्ता से उधार लेकर<br>बैंक से से उधार लेकर<br>मकान-जमीन या अन्य<br>सम्पत्ति बेचकर<br>स्वास्थ्य बीमा द्वारा<br>अन्य (विवरण दें)<br>_____                                                                 |
| 14 | ऊपर उल्लिखित<br>साधनों से आप कि<br>औसतन किस अनुपात<br>में राशि (प्रतिशत में)<br>अपने इलाज और दौरे<br>के लिए खर्च करते हैं? | अपनी बचत से _____ %<br>परिवार के सदस्य भुगतान करते<br>हैं _____ %<br>नियोक्ता द्वारा भुगतान _____ %<br>दोस्तों, रिश्तेदारों और नियोक्ता<br>से उधार लेकर _____ %<br>बैंक से से उधार लेकर _____ %<br>मकान-जमीन या अन्य सम्पत्ति<br>बेचकर _____ %<br>स्वास्थ्य बीमा द्वारा _____ %<br>अन्य _____ %<br>(विवरण दें _____) | अपनी बचत से _____ %<br>परिवार के सदस्य भुगतान करते हैं<br>_____ %<br>नियोक्ता द्वारा भुगतान _____ %<br>दोस्तों, रिश्तेदारों और नियोक्ता से<br>उधार लेकर _____ %<br>बैंक से से उधार लेकर _____ %<br>मकान-जमीन या अन्य सम्पत्ति<br>बेचकर _____ %<br>स्वास्थ्य बीमा द्वारा _____ %<br>अन्य _____ %<br>(विवरण दें _____) | अपनी बचत से _____ %<br>परिवार के सदस्य भुगतान करते हैं<br>_____ %<br>नियोक्ता द्वारा भुगतान _____ %<br>दोस्तों, रिश्तेदारों और नियोक्ता से<br>उधार लेकर _____ %<br>बैंक से से उधार लेकर _____ %<br>मकान-जमीन या अन्य सम्पत्ति<br>बेचकर _____ %<br>स्वास्थ्य बीमा द्वारा _____ %<br>अन्य _____ %<br>(विवरण दें _____) |

HR : MIN

15. साक्षात्कार का समय समाप्त

**Center of Excellence - Center for Cardio-metabolic Risk  
Reduction in South Asia  
(COE-CARRS)  
Questionnaire for Individuals Aged 20 Years & above**

**جنوبی ایشیاء میں دل کی بیماریوں کے متعلق تحقیق**

**ڈیپارٹمنٹ آف کمیونٹی ہیلتھ سائنسز آغا خان یونیورسٹی کراچی**

انٹرویو لینے والے کیلئے ہدایات :-  
شرکت کنندہ کا نمبر

جب تک اجازت نامہ پر دستخط نہ ہو جائیں انٹرویو شروع نہ کریں

گھرانہ نمبر

انٹرویوور کا نمبر

انٹرویو شروع کرنے کا وقت منٹ   گھنٹے   انٹرویو کی تاریخ

| SECTION-1                                   |                                    | DEMOGRAPHIC, SOCIO-ECONOMIC AND RESIDENTIAL DETAILS                                    |                                                                                                                                                                                                                                                             |
|---------------------------------------------|------------------------------------|----------------------------------------------------------------------------------------|-------------------------------------------------------------------------------------------------------------------------------------------------------------------------------------------------------------------------------------------------------------|
| آبادیاتی، سماجی، اقتصادی اور رہائشی تفصیلات |                                    |                                                                                        |                                                                                                                                                                                                                                                             |
| نمبر شمار                                   | سوالات                             | کوڈز                                                                                   | جوابات                                                                                                                                                                                                                                                      |
| 1                                           | شرکت کنندہ کا پورا نام:.....       |                                                                                        |                                                                                                                                                                                                                                                             |
| 2                                           | والد اشوہر کا پورا نام:.....       |                                                                                        |                                                                                                                                                                                                                                                             |
| 3                                           | پتہ:.....                          |                                                                                        |                                                                                                                                                                                                                                                             |
| 5                                           | فون نمبر:.....                     | گھر کا:<br>دفتر کا:<br>موبائل:                                                         | <input type="text"/> |
| 6                                           | ای میل ایڈریس:.....                |                                                                                        |                                                                                                                                                                                                                                                             |
| 7                                           | جائے پیدائش:.....                  | ضلع<br>صوبہ                                                                            |                                                                                                                                                                                                                                                             |
| 8                                           | عمر:- (مکمل سالوں میں).....        |                                                                                        | <input type="text"/> <input type="text"/> <input type="text"/>                                                                                                                                                                                              |
| 9                                           | تاریخ پیدائش:- (اگر معلوم ہو)..... |                                                                                        | <input type="text"/> <input type="text"/> <input type="text"/> <input type="text"/> <input type="text"/> <input type="text"/>                                                                                                                               |
| 10                                          | جنس:.....                          | 1- مرد<br>2- عورت                                                                      | <input type="text"/>                                                                                                                                                                                                                                        |
| 11                                          | آپکی ازدواجی حیثیت کیا ہے؟.....    | 1- غیر شادی شدہ<br>2- شادی شدہ<br>3- بیوہ / رنڈوہ<br>4- علیحدگی اطلاق یافتہ<br>5- دیگر | <input type="text"/><br>(دیگر کی وضاحت کریں)<br>.....                                                                                                                                                                                                       |

|                                                                                                                                  |                                                                                                                                                                                                                                                                                          |                                                                                                                                                                                                                                                           |
|----------------------------------------------------------------------------------------------------------------------------------|------------------------------------------------------------------------------------------------------------------------------------------------------------------------------------------------------------------------------------------------------------------------------------------|-----------------------------------------------------------------------------------------------------------------------------------------------------------------------------------------------------------------------------------------------------------|
| <div style="border: 1px solid black; width: 50px; height: 20px; margin: 0 auto;"></div> <p>(دیگر کی وضاحت کریں)</p> <p>.....</p> | <p>2- بلوچی<br/>3- بنگالی<br/>4- گجراتی<br/>6- ہندکو<br/>8- کشمیری<br/>11- مراٹھی<br/>12- میسنی<br/>13- پشتو<br/>14- پنجابی<br/>15- سندھی<br/>18- اردو<br/>19- دیگر</p>                                                                                                                  | <p>12 آپکی مادری زبان کونسی ہے؟.....</p>                                                                                                                                                                                                                  |
| <div style="border: 1px solid black; width: 50px; height: 20px; margin: 0 auto;"></div> <p>(دیگر کی وضاحت کریں)</p> <p>.....</p> | <p>1- ہندو<br/>2- مسلم<br/>3- سکھ<br/>4- عیسائی<br/>7- کوئی مذہب نہیں<br/>8- دیگر<br/>9- جواب نہیں دیا</p>                                                                                                                                                                               | <p>13 آپ کس مذہب سے تعلق رکھتے ہیں؟.....</p>                                                                                                                                                                                                              |
| <div style="border: 1px solid black; width: 50px; height: 20px; margin: 0 auto;"></div>                                          | <p>1- یاں<br/>2- نہیں<br/>3- پتہ نہیں<br/>4- بتانا نہیں چاہتے<br/>5- لاگو نہیں ہوتا</p>                                                                                                                                                                                                  | <p>14 کیا آپکا کسی خاص قبیلے یا ذات سے تعلق ہے؟.....</p>                                                                                                                                                                                                  |
| <div style="border: 1px solid black; width: 50px; height: 20px; margin: 0 auto;"></div> <p>سال</p>                               |                                                                                                                                                                                                                                                                                          | <p>15 آپ نے * باقاعدہ تعلیم کتنے سال حاصل کی؟.....<br/>* کسی بھی تعلیمی ادارے سکول، کالج، مدرسہ، یونیورسٹی وغیرہ)</p>                                                                                                                                     |
| <div style="border: 1px solid black; width: 50px; height: 20px; margin: 0 auto;"></div> <p>(دیگر کی وضاحت کریں)</p> <p>.....</p> | <p>1- پوسٹ گریجویٹ (پروفیشنل)<br/>2- گریجویٹ، ڈپلومہ B.A, B.Com, B.Sc<br/>3- سیکنڈری سکول / انٹر<br/>4- ہائی اسکول (مڈل جماعت)<br/>5- پرائمری اسکول (پانچویں جماعت تک)<br/>6- * پڑھ لکھ سکتے ہیں لیکن کسی ادارے سے باقاعدہ تعلیم حاصل نہیں کی۔<br/>7- ** غیر تعلیم یافتہ<br/>8- دیگر</p> | <p>16 آپکی تعلیمی حیثیت کیا ہے؟.....</p> <p>* وہ شخص جو کوئی بھی زبان سمجھ کر پڑھنا اور لکھنا جانتا ہو لیکن کوئی باقاعدہ تعلیم حاصل نہیں کی۔<br/>** وہ شخص جو نہ لکھ، پڑھ سکتا ہو یا صرف پڑھ سکتا ہو لیکن کسی بھی زبان میں لکھ نہیں سکتا ہو۔</p> <p>3</p> |

|                                                                                                                                                                                                                                                                                                                                                                                              |                                                                                                                                                                                                |                                                                                                                                                                  |
|----------------------------------------------------------------------------------------------------------------------------------------------------------------------------------------------------------------------------------------------------------------------------------------------------------------------------------------------------------------------------------------------|------------------------------------------------------------------------------------------------------------------------------------------------------------------------------------------------|------------------------------------------------------------------------------------------------------------------------------------------------------------------|
| <input type="checkbox"/><br>اگر جواب 1 ہو تو سوال نمبر 17a پوچھیں<br>ورنہ سوال نمبر 18 پوچھیں                                                                                                                                                                                                                                                                                                | 1- ملازم پیشہ<br>2- طالب علم<br>3- گھریلو خاتون<br>4- ریٹائرڈ<br>5- بے روزگار                                                                                                                  | 17 آپکارورنگار انوکری کیا ہے؟.....                                                                                                                               |
| <input type="checkbox"/>                                                                                                                                                                                                                                                                                                                                                                     |                                                                                                                                                                                                | 17a اگر آپ برسر روزگار ہیں تو آپ کا موجودہ پیشہ کیا ہے؟.....<br>(نیچے دیئے گئے کوڈز میں سے اپنے پیشہ کے مطابق قریب ترین کوڈ استعمال کریں)                        |
| <input type="checkbox"/><br>(اگر جواب 2 ہے تو سوال نمبر 19 پر جائیں)                                                                                                                                                                                                                                                                                                                         | 1- ہاں<br>2- نہیں                                                                                                                                                                              | 18 کیا آپ پچھلے دس سالوں میں کسی اور پیشہ سے منسلک رہے ہیں؟.....                                                                                                 |
| <input type="checkbox"/>                                                                                                                                                                                                                                                                                                                                                                     |                                                                                                                                                                                                | 18a اگر ہاں تو پیشہ کا نام بتائیں؟.....<br>(نیچے دیئے گئے کوڈز میں سے جو پیشہ آپ نے زیادہ عرصہ کے لئے اپنا یا ہوا اپنے پیشہ کے مطابق قریب ترین کوڈ استعمال کریں) |
| ملازمت کے کوڈز:<br>1- پروفیشنل، زمیندار، یونیورسٹی استاد، کلاس 11 انفیسر، وکیل<br>2- کلرک، متوسط درجہ کا کاروبار، متوسط درجہ کا کاشتکار، استاد، انچارج انجینئر<br>3- تربیت یافتہ مزدور، کم آمدن والا کاروبار، کم رقبہ پر کاشت کرنے والا کاشتکار<br>4- کم تربیت یافتہ مزدور، کم رقبہ والا زمیندار، رکشہ ڈرائیور، فوجی جوان، پلمبر، برائی (کارپینٹر)<br>5- غیر تربیت یافتہ مزدور، بے زمین باری |                                                                                                                                                                                                |                                                                                                                                                                  |
| <input type="checkbox"/>                                                                                                                                                                                                                                                                                                                                                                     | 1- 3000 سے کم<br>2- 3000 سے 10,000<br>3- 10,001 سے 20,000<br>4- 20,001 سے 30,000<br>5- 30,001 سے 40,000<br>6- 40,001 سے 50,000<br>7- 50,000 سے زائد<br>8- بتانے سے انکار کر دیا<br>9- پتہ نہیں | 19 آپکے گھرانے کی کل ماہانہ آمدنی کتنی ہے؟.....<br>(برائے مہربانی ان سب افراد کی آمدنی شامل کریں جو گھر کے اخراجات میں حصہ ڈالتے ہیں)                            |
| <input type="checkbox"/>                                                                                                                                                                                                                                                                                                                                                                     | 1- ہاں<br>2- نہیں                                                                                                                                                                              | 20 کیا آپکے گھر میں کھانا پکانے کیلئے الگ جگہ (کچن) ہے؟.....                                                                                                     |
| <input type="checkbox"/><br>(دیگر کی وضاحت کریں)                                                                                                                                                                                                                                                                                                                                             | 1- مٹی کا تیل، کوندہ<br>2- بجلی، ایل بی جی گیس، سورج کی روشنی<br>سے، سی این جی گیس<br>3- لکڑی، گوبر<br>4- دیگر                                                                                 | 21 کھانا پکانے کیلئے کونسا ایندھن استعمال کرتے ہیں؟.....<br>(جو ایندھن سب سے زیادہ استعمال کرتے ہیں وہ نوٹ کریں۔)                                                |

|                                       |                                                                                                                                                                                                                                |                                                                                                                                                                                          |
|---------------------------------------|--------------------------------------------------------------------------------------------------------------------------------------------------------------------------------------------------------------------------------|------------------------------------------------------------------------------------------------------------------------------------------------------------------------------------------|
| <p>.....<br/>(دیگر کی وضاحت کریں)</p> | <p>1- گھر میں لگا سرکاری نلکہ (پائپ والا)<br/>2- محلے میں لگا مشترکہ نلکہ (پائپ والا)<br/>3- گھر میں لگا ذاتی نلکہ (ہینڈ پیپ)<br/>4- بوتل کا پانی (منزل)<br/>5- فلٹر کا پانی (گھر کا یا باہر کا)<br/>6- دیگر</p>               | <p>22 آپکے گھر میں پینے کے پانی کا کیا ذریعہ ہے؟<br/>.....<br/>(اگر ایک سے زیادہ ذرائع ہیں تو جو سب سے زیادہ ذریعہ استعمال کیا جاتا ہے اسے نوٹ کریں۔)</p>                                |
| <p>.....<br/>(دیگر کی وضاحت کریں)</p> | <p>1- سرکاری بیت الخلاء<br/>2- مشترکہ بیت الخلاء (محلے میں)<br/>3- ذاتی بیت الخلاء (گھر کے اندر)<br/>4- دیگر</p>                                                                                                               | <p>23 آپ کونسا بیت الخلاء (ٹوائلٹ / باتھ روم) استعمال کرتے ہیں؟<br/>.....</p>                                                                                                            |
| <p>.....</p>                          | <p>1- ہاں 2- نہیں<br/>a- ٹی وی<br/>b- فریج<br/>c- واشنگ مشین<br/>d- مائیکرو ویو آون<br/>e- مکسر گرائینڈر<br/>f- موبائل فون<br/>g- ڈی وی ڈی پلیئر<br/>h- کمپیوٹر<br/>i- گاڑی / کار<br/>j- موٹر سائیکل / سکوٹر<br/>k- سائیکل</p> | <p>24 کیا آپکے گھر میں درج ذیل اشیاء موجود ہیں؟<br/>.....</p>                                                                                                                            |
| <p>.....</p>                          | <p>1- ہاں<br/>2- نہیں<br/>3- پتہ نہیں</p>                                                                                                                                                                                      | <p>25 کیا ایک یا دو سال کے درمیان آپ کا موجودہ رہائش سے کہیں اور منتقل ہونے کا کوئی امکان ہے؟<br/>.....</p>                                                                              |
| <p>.....<br/>(دیگر کی وضاحت کریں)</p> | <p>1- پڑوسی<br/>2- رشتہ دار<br/>3- دوست<br/>4- جن کے ہاں کام کرتے ہیں (ایمپلائز)<br/>5- کوئی نہیں<br/>6- دیگر</p>                                                                                                              | <p>26 اگر آپ موجودہ رہائش سے کہیں اور منتقل ہوتے ہیں تو ہم کن افراد سے رابطہ کر کے آپکی نئی رہائش کا پتہ اور ٹیلیفون نمبر حاصل کر سکتے ہیں؟<br/>.....<br/>(دو افراد کی تفصیلات لیں۔)</p> |
| <p>.....</p>                          | <p>27 پہلے فرد کا نام جس سے رابطہ کیا جاسکے؟<br/>.....</p>                                                                                                                                                                     |                                                                                                                                                                                          |
| <p>.....</p>                          | <p>28 پتہ:<br/>.....</p>                                                                                                                                                                                                       |                                                                                                                                                                                          |

|                                                                      |                                                       |                                              |    |
|----------------------------------------------------------------------|-------------------------------------------------------|----------------------------------------------|----|
| <input type="text"/><br><input type="text"/><br><input type="text"/> | فون نمبر گھر کا:<br>فون نمبر دفتر کا:<br>موبائل نمبر: | فون نمبر:.....<br>.....<br>.....             | 29 |
|                                                                      |                                                       | دوسرے فرد کا نام جس سے رابطہ کیا جاسکے؟..... | 30 |
|                                                                      |                                                       | پتہ:.....                                    | 31 |
| <input type="text"/><br><input type="text"/><br><input type="text"/> | فون نمبر گھر کا:<br>فون نمبر دفتر کا:<br>موبائل نمبر: | فون نمبر:.....<br>.....<br>.....             | 32 |

## SECTION-2

TOBACCO AND ALCOHOL CONSUMPTION, DIETARY HABITS, PHYSICAL ACTIVITY AND SLEEP

تंबا کو نوشی، شراب نوشی، خوراک، ورزش اور نیند کے بارے میں معلومات

### PART-A

#### تंबا کو کا استعمال

|                                                                                                                                          |                                                                                                                              |                                                                 |   |
|------------------------------------------------------------------------------------------------------------------------------------------|------------------------------------------------------------------------------------------------------------------------------|-----------------------------------------------------------------|---|
| <input type="text"/><br>(اگر جواب 2 ہو تو سوال نمبر 8 پر جائیں)                                                                          | 1- ہاں<br>2- نہیں                                                                                                            | کیا آپ نے کبھی تمباکو کا استعمال کیا ہے؟.....                   | 1 |
| <input type="text"/><br><input type="text"/><br><input type="text"/>                                                                     | 1- ہاں 2- نہیں<br>a- تمباکو نوشی کی صورت میں<br>b- چبانے کی صورت میں<br>c- کسی بھی اور صورت میں (نسوار، ٹوتھ پیسٹ، گل وغیرہ) | آپ نے تمباکو کا استعمال کس طرح کیا ہے؟.....                     | 2 |
| <input type="text"/><br>(اگر جواب 2 ہو تو سوال نمبر 5 پر جائیں)                                                                          | 1- ہاں<br>2- نہیں                                                                                                            | کیا آپ آہلکل (پچھلے 6 مہینوں میں) تمباکو استعمال کرتے ہیں؟..... | 3 |
| تمباکو نوشی کی صورت میں<br><input type="text"/><br>چبانے کی صورت میں<br><input type="text"/><br>کسی اور صورت میں<br><input type="text"/> | 1- باقاعدگی سے (ہفتے میں ایک یا ایک سے زیادہ مرتبہ)<br>2- کبھی کبھی (ہفتے میں ایک سے کم)<br>3- نہیں<br>9- لاگو نہیں ہوتا     | اگر ہاں تو کتنا استعمال کرتے ہیں؟.....                          | 4 |

| 5             |                                                                                                                                                                    | تبا کو کے استعمال کی مقدار اور مدت۔<br>(موجودہ اور سابقہ تبا کو استعمال کرنے والے دونوں کیلئے) |                                                         |                                                  |                                                       |
|---------------|--------------------------------------------------------------------------------------------------------------------------------------------------------------------|------------------------------------------------------------------------------------------------|---------------------------------------------------------|--------------------------------------------------|-------------------------------------------------------|
| تبا کو کی قسم | برانڈ کا نام                                                                                                                                                       | مدت استعمال                                                                                    |                                                         | مہینے میں استعمال<br>*تعداد** دفعہ*** انداز گرام | اگر استعمال کرنا چھوڑ دیا ہو تو کتنے عرصے سے چھوڑا ہے |
|               |                                                                                                                                                                    | سال                                                                                            | مہینے                                                   |                                                  |                                                       |
| 1             | *سگریٹ                                                                                                                                                             |                                                                                                |                                                         |                                                  |                                                       |
| 2             | *بیری                                                                                                                                                              |                                                                                                |                                                         |                                                  |                                                       |
| 3             | *سگار                                                                                                                                                              |                                                                                                |                                                         |                                                  |                                                       |
| 4             | **حقہ اچیلیم اپا پ                                                                                                                                                 |                                                                                                |                                                         |                                                  |                                                       |
| 5             | ***چبانے والا تبا کو                                                                                                                                               |                                                                                                |                                                         |                                                  |                                                       |
| 6             | ***پان تبا کو والا                                                                                                                                                 |                                                                                                |                                                         |                                                  |                                                       |
| 7             | ***پان مصالحہ                                                                                                                                                      |                                                                                                |                                                         |                                                  |                                                       |
| 8             | **نوار                                                                                                                                                             |                                                                                                |                                                         |                                                  |                                                       |
| 9             | ***گھٹا                                                                                                                                                            |                                                                                                |                                                         |                                                  |                                                       |
| 10            | دیگر (دیگر کی وضاحت)                                                                                                                                               |                                                                                                |                                                         |                                                  |                                                       |
| 6             | آپ نے کس عمر سے باقاعدگی سے تبا کو نوشی شروع کی؟                                                                                                                   |                                                                                                | اگر لاگو نہیں ہوتا تو (99) لکھیں                        |                                                  |                                                       |
| 7             | آپ نے کس عمر سے چبانے والی اشیاء، تبا کو والے پان، نوار، گھٹا یا سٹی وغیرہ کا استعمال باقاعدگی سے شروع کیا؟                                                        |                                                                                                | اگر لاگو نہیں ہوتا تو (99) لکھیں                        |                                                  |                                                       |
| 8             | کیا آپ اکثر ایسے ماحول میں رہتے ہیں جہاں دوسرے لوگ تبا کو نوشی کرتے ہیں (مثلاً گھر میں، کام کی جگہ پر، سفر کے دوران یا کسی اور جگہ پر) *ہفتہ میں کم از کم ایک دفعہ |                                                                                                | 1- ہاں<br>2- نہیں<br>(اگر جواب 2 ہو تو پارٹ B پر جائیں) |                                                  |                                                       |
| 9             | اگر ہاں تو                                                                                                                                                         |                                                                                                | ہفتے میں کتنے دن<br>دن میں کتنا وقت                     |                                                  |                                                       |



**PART-B**  
**ALCOHOL USE**

**شراب کا استعمال**

|                                                                                                                                                                                    |                                                                                                                                                                                                                                                                                              |                                                     |                                      |
|------------------------------------------------------------------------------------------------------------------------------------------------------------------------------------|----------------------------------------------------------------------------------------------------------------------------------------------------------------------------------------------------------------------------------------------------------------------------------------------|-----------------------------------------------------|--------------------------------------|
| <input style="width: 50px; height: 20px;" type="text"/><br>اگر جواب 2 ہو تو C, PART پر جائیں                                                                                       | 1- ہاں<br>2- نہیں                                                                                                                                                                                                                                                                            | کیا آپ نے کبھی شراب استعمال کی ہے؟.....             | 1                                    |
| <input style="width: 50px; height: 20px;" type="text"/><br>اگر جواب 5 ہو تو C, PART پر جائیں                                                                                       | 1- سبکل باقاعدگی سے شراب استعمال کرتے ہیں<br>2- *سبکل کبھی کبھار شراب کا استعمال کرتے ہیں * (بہتے میں ایک دفعہ سے کم)<br>3- ماضی میں شراب کا استعمال کرتے تھے (6 ماہ سے زیادہ ہوئے ہیں)<br>4- حال ہی میں شراب کا استعمال چھوڑا ہے (6 ماہ سے کم ہوئے ہیں)<br>5- کبھی شراب کا استعمال نہیں کیا | آپ شراب والی مشروبات کا کتنا استعمال کرتے ہیں؟..... | 2                                    |
| 3 شراب کے استعمال کی تفصیل (موجودہ اور ماضی میں شراب استعمال کرنے والوں کیلئے)                                                                                                     |                                                                                                                                                                                                                                                                                              |                                                     |                                      |
| اگر چھوڑ دی ہے تو کتنا عرصہ ہوا                                                                                                                                                    |                                                                                                                                                                                                                                                                                              | مقدار *<br>ہفتے میں استعمال<br>کی تعداد             | استعمال کا دورانیہ<br>شراب کی اقسام  |
| سال<br>مہینے                                                                                                                                                                       | سال<br>مہینے                                                                                                                                                                                                                                                                                 | سال<br>مہینے                                        | سال<br>مہینے                         |
|                                                                                                                                                                                    |                                                                                                                                                                                                                                                                                              |                                                     | a<br>دسی شراب (کوئی، ٹھرا، کچی شراب) |
|                                                                                                                                                                                    |                                                                                                                                                                                                                                                                                              |                                                     | b<br>شراب                            |
|                                                                                                                                                                                    |                                                                                                                                                                                                                                                                                              |                                                     | c<br>بیسر                            |
|                                                                                                                                                                                    |                                                                                                                                                                                                                                                                                              |                                                     | d<br>وائین                           |
| *متبادل مقدار:- ایک چھوٹا پیگ = 30ml - ایک بڑا پیگ = 60ml - ایک بہت بڑا پیگ = 90ml - ایک گلاس بیئر = 325ml ایک گلاس وائین = 100ml (برائے مہربانی مقامی حساب سے مقدار کا تعین کریں) |                                                                                                                                                                                                                                                                                              |                                                     |                                      |

PART-C

PHYSICAL ACTIVITY

جسمانی مشقت کے بارے میں

اب ہم جسمانی مشقت کے بارے میں جاننے کے لئے چند سوالات پوچھیں گے جو لوگوں کی روزمرہ زندگی کا حصہ ہیں۔ برائے مہربانی اگر آپ سمجھتے ہیں کہ آپ کوئی جسمانی مشقت نہیں کرتے تب بھی سارے سوالوں کے جواب دیں۔ اس جسمانی مشقت کے بارے میں سوچیں جو آپ کام کے دوران، گھر میں، ایک جگہ سے دوسری جگہ جاتے ہوئے اور اپنے فارغ اوقات میں مشغلہ کے طور پر کرتے ہیں یا کوئی ورزش یا کھیل جس میں آپ حصہ لیتے ہیں۔ اب آپ اس مشقت کے بارے میں سوچیں جو آپ معمول کے ایک ہفتے میں کرتے ہیں یہ وہ سخت مشقت ہے جس سے آپکی سانس بہت تیز ہو جاتی ہو جیسے ہماری سلمان اٹھانا، کھدائی کرنا، ورزش کرنا، پیدل تیز چلنا یا سائیکل چلانا۔ صرف ان کاموں کے بارے میں سوچیں جو آپ کم از کم 10 منٹ کیلئے ایک وقت میں مسلسل کرتے ہوں۔

|                                                                                                                                                                        |                                                                                                                                                                                                                  |                                                                                                                                                                        |
|------------------------------------------------------------------------------------------------------------------------------------------------------------------------|------------------------------------------------------------------------------------------------------------------------------------------------------------------------------------------------------------------|------------------------------------------------------------------------------------------------------------------------------------------------------------------------|
| <p>1</p> <p>معمول کے سات دنوں میں کتنے دن آپ سخت جسمانی مشقت کرتے ہیں؟.....</p>                                                                                        | <p>1- دن فی ہفتہ (اگر 0 ہو تو سوال 3 پر جائیں)</p> <p>2- بتانے سے انکار کر دیا (سوال 3 پر جائیں)</p> <p>3- پتہ نہیں اندازہ نہیں (سوال 3 پر جائیں)</p> <p>4- کوئی سخت جسمانی مشقت نہیں کرتے (سوال 3 پر جائیں)</p> | <p>1</p> <p>ان دنوں میں کسی ایک دن آپ کتنے وقت کیلئے سخت جسمانی مشقت کرتے ہیں صرف ان کاموں کے بارے میں سوچیں جو آپ کم از کم 10 منٹ تک ایک ہی وقت میں کرتے ہوں.....</p> |
| <p>2</p> <p>ان دنوں میں کسی ایک دن آپ کتنے وقت کیلئے سخت جسمانی مشقت کرتے ہیں صرف ان کاموں کے بارے میں سوچیں جو آپ کم از کم 10 منٹ تک ایک ہی وقت میں کرتے ہوں.....</p> | <p>1- گھنٹہ / منٹ فی دن</p> <p>2- بتانے سے انکار کر دیا (سوال نمبر 2a پر جائیں)</p> <p>3- پتہ نہیں اندازہ نہیں (سوال نمبر 2a پر جائیں)</p>                                                                       | <p>2</p> <p>ان دنوں میں کسی ایک دن آپ کتنے وقت کیلئے سخت جسمانی مشقت کرتے ہیں صرف ان کاموں کے بارے میں سوچیں جو آپ کم از کم 10 منٹ تک ایک ہی وقت میں کرتے ہوں.....</p> |

انٹرویو لینے والے کیلئے مزید معلومات

اگر روزانہ مختلف دورانیہ کیلئے سخت جسمانی مشقت کرنے کی وجہ سے جواب دینے والے (Respondent) کیلئے جواب دینا مشکل ہو تو کہیں، مجھے دلچسپی ہے کسی بھی ایک دن کے اوسط وقت سے جس میں آپ سخت جسمانی مشقت کرتے ہیں۔

|                                                                                                                            |                                                                                            |                                                                                                                            |
|----------------------------------------------------------------------------------------------------------------------------|--------------------------------------------------------------------------------------------|----------------------------------------------------------------------------------------------------------------------------|
| <p>2a</p> <p>کیا آپ مجھے بتا سکتے ہیں کہ آپ معمول کے 7 دنوں میں کل کتنا وقت سخت جسمانی مشقت کرتے ہوئے گزارتے ہیں؟.....</p> | <p>1- گھنٹہ / منٹ فی دن</p> <p>2- بتانے سے انکار کر دیا</p> <p>3- پتہ نہیں اندازہ نہیں</p> | <p>2a</p> <p>کیا آپ مجھے بتا سکتے ہیں کہ آپ معمول کے 7 دنوں میں کل کتنا وقت سخت جسمانی مشقت کرتے ہوئے گزارتے ہیں؟.....</p> |
|----------------------------------------------------------------------------------------------------------------------------|--------------------------------------------------------------------------------------------|----------------------------------------------------------------------------------------------------------------------------|

اب آپ ان تمام درمیانی درجے کی مشقت والے کاموں کے بارے میں سوچیں جو آپ معمول کے 7 دنوں میں کرتے ہیں۔ درمیانی درجے کی جسمانی مشقت وہ ہے جس سے آپ معمول سے تھوڑی تیز اور گھمری سانس لینے لگتے ہیں۔ ان میں پیدل چلنا شامل ہے۔ صرف ان کاموں کے بارے میں سوچیں جو آپ کم از کم 10 منٹ کے لئے مسلسل (ایک وقت میں) کرتے ہیں

|                                                                                                                                                                                                                                                                                                                                                                                                                                          |                                                                                                                                                                                                                              |                                                                                                                                                                                                                                                                                                                                                                                                                                          |
|------------------------------------------------------------------------------------------------------------------------------------------------------------------------------------------------------------------------------------------------------------------------------------------------------------------------------------------------------------------------------------------------------------------------------------------|------------------------------------------------------------------------------------------------------------------------------------------------------------------------------------------------------------------------------|------------------------------------------------------------------------------------------------------------------------------------------------------------------------------------------------------------------------------------------------------------------------------------------------------------------------------------------------------------------------------------------------------------------------------------------|
| <p>3</p> <p>معمول کے 7 دنوں میں کتنے دن آپ درمیانی درجے کی جسمانی مشقت کم از کم 10 منٹ کرتے ہیں؟.....</p> <p>(مثال کے طور پر:- ہماری چیزیں اٹھانا، ایک خاص رفتار سے سائیکل چلانا، ٹینس کھیلنا، ہاتھ سے کپڑے دھونا، فرش پر پونچھا لگنا، باغبانی، 3 سال سے کم عمر کے بچوں کا خیال رکھنا، گاڑی یا موٹر سائیکل دھونا، بازار سے سبزیاں اور دیگر اشیاء اٹھا کر گھر تک پیدل چلنا، سیر حیاں چڑھنا (3 یا زیادہ منزلیں) اور پتھر سے چٹھی پینا۔</p> | <p>1- دن فی ہفتہ (اگر 0 ہو تو سوال 5 پر جائیں)</p> <p>2- بتانے سے انکار کر دیا (سوال 5 پر جائیں)</p> <p>3- پتہ نہیں اندازہ نہیں (سوال 5 پر جائیں)</p> <p>4- کوئی درمیانی درجے کی جسمانی مشقت نہیں کرتے (سوال 5 پر جائیں)</p> | <p>3</p> <p>معمول کے 7 دنوں میں کتنے دن آپ درمیانی درجے کی جسمانی مشقت کم از کم 10 منٹ کرتے ہیں؟.....</p> <p>(مثال کے طور پر:- ہماری چیزیں اٹھانا، ایک خاص رفتار سے سائیکل چلانا، ٹینس کھیلنا، ہاتھ سے کپڑے دھونا، فرش پر پونچھا لگنا، باغبانی، 3 سال سے کم عمر کے بچوں کا خیال رکھنا، گاڑی یا موٹر سائیکل دھونا، بازار سے سبزیاں اور دیگر اشیاء اٹھا کر گھر تک پیدل چلنا، سیر حیاں چڑھنا (3 یا زیادہ منزلیں) اور پتھر سے چٹھی پینا۔</p> |
|------------------------------------------------------------------------------------------------------------------------------------------------------------------------------------------------------------------------------------------------------------------------------------------------------------------------------------------------------------------------------------------------------------------------------------------|------------------------------------------------------------------------------------------------------------------------------------------------------------------------------------------------------------------------------|------------------------------------------------------------------------------------------------------------------------------------------------------------------------------------------------------------------------------------------------------------------------------------------------------------------------------------------------------------------------------------------------------------------------------------------|

|                                                                                                                                                                                                                                                                                                                                                                                                                                                                                               |  |  |  |  |  |  |              |                                                                                                                                                                                         |                                                                                                                                                                                   |    |
|-----------------------------------------------------------------------------------------------------------------------------------------------------------------------------------------------------------------------------------------------------------------------------------------------------------------------------------------------------------------------------------------------------------------------------------------------------------------------------------------------|--|--|--|--|--|--|--------------|-----------------------------------------------------------------------------------------------------------------------------------------------------------------------------------------|-----------------------------------------------------------------------------------------------------------------------------------------------------------------------------------|----|
| <table border="1"> <tr><td></td><td></td></tr> <tr><td></td><td></td></tr> <tr><td></td><td></td></tr> </table>                                                                                                                                                                                                                                                                                                                                                                               |  |  |  |  |  |  | گھنٹے<br>منٹ | <p>1- گھنٹہ 1 منٹ فی دن<br/>2- بتانے سے انکار کر دیا (سوال نمبر 4a پر جائیں)<br/>3- پتہ نہیں اندازہ نہیں (سوال نمبر 4a پر جائیں)</p>                                                    | <p>4 ان دنوں میں کسی ایک دن آپ کتنے وقت کیلئے درمیانی درجے کی جسمانی مشقت کرتے ہیں صرف ان جسمانی مشقت کے بارے میں سوچیں جو آپ کم از کم 10 منٹ تک ایک ہی وقت میں کرتے ہوں.....</p> | 4  |
|                                                                                                                                                                                                                                                                                                                                                                                                                                                                                               |  |  |  |  |  |  |              |                                                                                                                                                                                         |                                                                                                                                                                                   |    |
|                                                                                                                                                                                                                                                                                                                                                                                                                                                                                               |  |  |  |  |  |  |              |                                                                                                                                                                                         |                                                                                                                                                                                   |    |
|                                                                                                                                                                                                                                                                                                                                                                                                                                                                                               |  |  |  |  |  |  |              |                                                                                                                                                                                         |                                                                                                                                                                                   |    |
| <p>انٹرویو لینے والے کیلئے مزید معلومات<br/>اگر روزانہ مختلف دورانیہ کیلئے درمیانی درجے کی جسمانی مشقت کرنے کی وجہ سے جواب دینے والے (Respondent) کیلئے جواب دینا مشکل ہو تو کہیں، مجھے دلچسپی ہے کسی بھی ایک دن کے اوسط وقت سے جس میں آپ درمیانی درجے کی جسمانی مشقت کرتے ہیں۔</p>                                                                                                                                                                                                           |  |  |  |  |  |  |              |                                                                                                                                                                                         |                                                                                                                                                                                   |    |
| <table border="1"> <tr><td></td><td></td></tr> <tr><td></td><td></td></tr> <tr><td></td><td></td></tr> </table>                                                                                                                                                                                                                                                                                                                                                                               |  |  |  |  |  |  | گھنٹے<br>منٹ | <p>1- گھنٹہ 1 منٹ فی دن<br/>2- بتانے سے انکار کر دیا<br/>3- پتہ نہیں اندازہ نہیں</p>                                                                                                    | <p>4a معمول کے 7 دنوں میں کتنا وقت آپ درمیانی درجے کی جسمانی مشقت کرتے ہوئے گزارتے ہیں؟.....</p>                                                                                  | 4a |
|                                                                                                                                                                                                                                                                                                                                                                                                                                                                                               |  |  |  |  |  |  |              |                                                                                                                                                                                         |                                                                                                                                                                                   |    |
|                                                                                                                                                                                                                                                                                                                                                                                                                                                                                               |  |  |  |  |  |  |              |                                                                                                                                                                                         |                                                                                                                                                                                   |    |
|                                                                                                                                                                                                                                                                                                                                                                                                                                                                                               |  |  |  |  |  |  |              |                                                                                                                                                                                         |                                                                                                                                                                                   |    |
| <p>اب آپ اس وقت کے بارے میں سوچیں جو آپ معمول کے 7 دنوں میں پیدل چلتے ہوئے گزارتے ہیں اس میں کام کے دوران، گھر میں اور ایک جگہ سے دوسری جگہ پیدل چل کے جانا شامل ہیں۔ اس میں وہ پیدل چلنا بھی شامل ہے جو آپ صرف تفریح کے لئے، کھیل میں یا ورزش کرتے ہوئے کرتے ہیں مثلاً بس اسٹاپ تک، کام کی جگہ تک، یا مارکیٹ تک کم از کم 10 منٹ تک پیدل چل کے جانا۔</p>                                                                                                                                      |  |  |  |  |  |  |              |                                                                                                                                                                                         |                                                                                                                                                                                   |    |
| <table border="1"> <tr><td></td><td></td></tr> <tr><td></td><td></td></tr> <tr><td></td><td></td></tr> </table>                                                                                                                                                                                                                                                                                                                                                                               |  |  |  |  |  |  | گھنٹے<br>منٹ | <p>1- دن فی ہفتہ (اگر 0 ہو تو سوال 7 پر جائیں)<br/>2- بتانے سے انکار کر دیا (سوال 7 پر جائیں)<br/>3- پتہ نہیں اندازہ نہیں (سوال 7 پر جائیں)<br/>4- پیدل نہیں چلتے (سوال 7 پر جائیں)</p> | <p>5 معمول کے 7 دنوں میں کتنے دن آپ کم از کم 10 منٹ تک ایک ہی وقت میں پیدل چلتے ہیں۔ صرف اس پیدل چلنے کے بارے میں سوچیں جو کم از کم 10 منٹ تک ایک ہی وقت میں ہو.....</p>          | 5  |
|                                                                                                                                                                                                                                                                                                                                                                                                                                                                                               |  |  |  |  |  |  |              |                                                                                                                                                                                         |                                                                                                                                                                                   |    |
|                                                                                                                                                                                                                                                                                                                                                                                                                                                                                               |  |  |  |  |  |  |              |                                                                                                                                                                                         |                                                                                                                                                                                   |    |
|                                                                                                                                                                                                                                                                                                                                                                                                                                                                                               |  |  |  |  |  |  |              |                                                                                                                                                                                         |                                                                                                                                                                                   |    |
| <table border="1"> <tr><td></td><td></td></tr> <tr><td></td><td></td></tr> <tr><td></td><td></td></tr> </table>                                                                                                                                                                                                                                                                                                                                                                               |  |  |  |  |  |  | گھنٹے<br>منٹ | <p>1- گھنٹہ 1 منٹ فی دن (سوال نمبر 7 پر جائیں)<br/>2- بتانے سے انکار کر دیا (سوال نمبر 6a پر جائیں)<br/>3- پتہ نہیں اندازہ نہیں (سوال نمبر 6a پر جائیں)</p>                             | <p>6 ان دنوں میں کسی ایک دن آپ عموماً کتنا وقت پیدل چلتے ہوئے گزارتے ہیں.....</p>                                                                                                 | 6  |
|                                                                                                                                                                                                                                                                                                                                                                                                                                                                                               |  |  |  |  |  |  |              |                                                                                                                                                                                         |                                                                                                                                                                                   |    |
|                                                                                                                                                                                                                                                                                                                                                                                                                                                                                               |  |  |  |  |  |  |              |                                                                                                                                                                                         |                                                                                                                                                                                   |    |
|                                                                                                                                                                                                                                                                                                                                                                                                                                                                                               |  |  |  |  |  |  |              |                                                                                                                                                                                         |                                                                                                                                                                                   |    |
| <p>انٹرویو لینے والے کیلئے مزید معلومات<br/>اگر روزانہ مختلف دورانیہ کیلئے پیدل چلنے کی وجہ سے جواب دینے والے (Respondent) کیلئے جواب دینا مشکل ہو تو کہیں، مجھے دلچسپی ہے کسی بھی ایک دن کے اوسط وقت سے جو آپ ان دنوں میں سے کسی ایک دن پیدل چل کے گزارتے ہیں</p>                                                                                                                                                                                                                            |  |  |  |  |  |  |              |                                                                                                                                                                                         |                                                                                                                                                                                   |    |
| <table border="1"> <tr><td></td><td></td></tr> <tr><td></td><td></td></tr> <tr><td></td><td></td></tr> </table>                                                                                                                                                                                                                                                                                                                                                                               |  |  |  |  |  |  | گھنٹے<br>منٹ | <p>1- گھنٹہ 1 منٹ فی دن<br/>2- بتانے سے انکار کر دیا<br/>3- پتہ نہیں اندازہ نہیں</p>                                                                                                    | <p>6a کیا آپ مجھے بتا سکتے ہیں کہ آپ معمول کے 7 دنوں میں کل کتنا وقت پیدل چلتے ہوئے گزارتے ہیں؟.....</p>                                                                          | 6a |
|                                                                                                                                                                                                                                                                                                                                                                                                                                                                                               |  |  |  |  |  |  |              |                                                                                                                                                                                         |                                                                                                                                                                                   |    |
|                                                                                                                                                                                                                                                                                                                                                                                                                                                                                               |  |  |  |  |  |  |              |                                                                                                                                                                                         |                                                                                                                                                                                   |    |
|                                                                                                                                                                                                                                                                                                                                                                                                                                                                                               |  |  |  |  |  |  |              |                                                                                                                                                                                         |                                                                                                                                                                                   |    |
| <p>اب آپ اس وقت کے بارے میں سوچیں جو آپ معمول کے 7 دنوں (چھٹی کے دنوں کے علاوہ) میں بیٹھ کر گزارتے ہیں اس میں وہ وقت شامل ہے جو آپ کام کے دوران، گھر میں یا تفریح کے دوران بیٹھ کر گزارتے ہیں اس میں وہ وقت بھی شامل ہے جو آپ دفتر میں بیٹھ کر کام کرتے ہوئے گزارتے ہیں، دوستوں کے ہاں بیٹھتے ہیں، پڑھتے ہوئے یا بیٹھ کر لیٹ کرٹی وی دیکھنا، بچوں کو پڑھانے ہوئے، سبزیاں کاٹتے ہوئے، سلاخی کھانی کرتے ہوئے، نماز پڑھتے ہوئے، فون پر بات کرتے ہوئے یا کمپیوٹر پر کام کرتے ہوئے گزارتے ہیں۔</p> |  |  |  |  |  |  |              |                                                                                                                                                                                         |                                                                                                                                                                                   |    |
| <table border="1"> <tr><td></td><td></td></tr> <tr><td></td><td></td></tr> <tr><td></td><td></td></tr> </table>                                                                                                                                                                                                                                                                                                                                                                               |  |  |  |  |  |  | گھنٹے<br>منٹ | <p>1- گھنٹہ 1 منٹ فی دن (سوال نمبر 8 پر جائیں)<br/>2- بتانے سے انکار کر دیا (سوال نمبر 7a پر جائیں)<br/>3- پتہ نہیں اندازہ نہیں (سوال نمبر 7a پر جائیں)</p>                             | <p>7 معمول کے 7 دنوں میں عموماً کام کے دنوں میں کتنا وقت بیٹھ کر گزارتے ہیں؟ (رات کو سونے کا وقت شامل نہ کریں)</p>                                                                | 7  |
|                                                                                                                                                                                                                                                                                                                                                                                                                                                                                               |  |  |  |  |  |  |              |                                                                                                                                                                                         |                                                                                                                                                                                   |    |
|                                                                                                                                                                                                                                                                                                                                                                                                                                                                                               |  |  |  |  |  |  |              |                                                                                                                                                                                         |                                                                                                                                                                                   |    |
|                                                                                                                                                                                                                                                                                                                                                                                                                                                                                               |  |  |  |  |  |  |              |                                                                                                                                                                                         |                                                                                                                                                                                   |    |

انٹرویو لینے والے کیلئے مزید معلومات اگر روزانہ مختلف دورانیہ کیلئے بیٹھ کر وقت گزارنے کی وجہ سے جواب دینے والے کیلئے جواب دینا مشکل ہو تو کہیں مجھے دلچسپی ہے اس اوسط وقت سے جو آپ روز بیٹھ کر گزارتے ہیں؟

|    |                                                                                   |                                                                                   |              |
|----|-----------------------------------------------------------------------------------|-----------------------------------------------------------------------------------|--------------|
| 7a | کیا آپ مجھے بتا سکتے ہیں کہ آپ نے پچھلی بدھ کے دن کتنا وقت بیٹھ کر گزارا تھا..... | 1- گھنٹہ / منٹ بدھ کے دن<br>2- بتانے سے انکار کر دیا<br>3- پتہ نہیں / اندازہ نہیں | گھنٹے<br>منٹ |
|----|-----------------------------------------------------------------------------------|-----------------------------------------------------------------------------------|--------------|

8 مزید تبصرہ:-

## PART-D

### SLEEP

#### نیند کے بارے میں

|   |                                                                                                                                                                                                                                                                                                                       |                                     |                |
|---|-----------------------------------------------------------------------------------------------------------------------------------------------------------------------------------------------------------------------------------------------------------------------------------------------------------------------|-------------------------------------|----------------|
| 1 | آپ کو رات کو سونے کیلئے عموماً کتنے گھنٹے ملتے ہیں؟.....<br>(ہر رات سونے کے اوسط گھنٹے)                                                                                                                                                                                                                               | کام کے دنوں میں<br>چھٹی کے دنوں میں | گھنٹے<br>گھنٹے |
| 2 | عام طور پر ایک ہفتہ میں آپ کتنی دفعہ 5 منٹ یا اس سے زیادہ کیلورہ ( دن کے وقت سونا) کرتے / کرتی ہیں؟<br>(اگر بتانے والا کوئی کیلورہ نہیں کرتا تو 00 لکھیں)                                                                                                                                                             |                                     |                |
| 3 | برائے مہربانی بتائیں کہ آپ کو مندرجہ ذیل کیفیتوں کا تجربہ کتنی دفعہ ہوا ہے؟.....<br>(نیچے دیئے گئے کوڈز کے مطابق بتائیں)<br>1- کبھی نہیں<br>2- بہت کم (مہینے میں ایک دفعہ یا اس سے کم)<br>3- بعض دفعہ ( مہینے میں 2 سے 4 مرتبہ)<br>4- اکثر ( مہینے میں 5 سے 15 مرتبہ)<br>5- تقریباً ہمیشہ ( مہینے میں 16 سے 30 مرتبہ) |                                     |                |
| A | نیند مشکل سے آتی ہے                                                                                                                                                                                                                                                                                                   |                                     |                |
| B | رات کو سوتے میں جاگ جاتے ہیں اور پھر دوبارہ مشکل سے نیند آتی ہے                                                                                                                                                                                                                                                       |                                     |                |
| C | صبح بہت جلدی جاگ جاتے ہیں اور پھر نیند نہیں آتی                                                                                                                                                                                                                                                                       |                                     |                |
| D | آپ دن میں بے سکونی محسوس کرتے                                                                                                                                                                                                                                                                                         |                                     |                |
| E | نیند ناکافی ہوتی ہے                                                                                                                                                                                                                                                                                                   |                                     |                |
| F | سونے کے لیے نیند کی گولیاں یا کوئی اور دوائی استعمال کرتے ہیں                                                                                                                                                                                                                                                         |                                     |                |

سوال نمبر 4 سے 10 تک نیند میں خرابی مارنے اور سانس لینے کے بارے میں ہیں۔ ان سوالات کا جواب دیتے ہوئے وہ بتائیں جو آپ اپنے بارے میں جانتے ہیں یا کسی اور نے آپ کو بتایا ہو۔

|   |                                                                      |                                  |                                            |
|---|----------------------------------------------------------------------|----------------------------------|--------------------------------------------|
| 4 | کیا آپ نے کبھی نیند میں خرابی لینیے میں (ابھی یا کبھی ماضی میں)..... | 1- ہاں<br>2- نہیں<br>8- پتہ نہیں | اگر جواب 2 یا 8 ہو تو سوال نمبر 7 پر جائیں |
|---|----------------------------------------------------------------------|----------------------------------|--------------------------------------------|

|                                                                                                                                                                                                                                                                                     |                                                                                                                                                     |
|-------------------------------------------------------------------------------------------------------------------------------------------------------------------------------------------------------------------------------------------------------------------------------------|-----------------------------------------------------------------------------------------------------------------------------------------------------|
| <p>0۔ اب خراٹے نہیں لیتے</p> <p>1۔ بہت کم (ہفتہ میں ایک رات سے کم)</p> <p>2۔ کبھی کبھار (ہفتہ میں 1 سے 2 راتیں)</p> <p>3۔ اکثر (ہفتہ میں 3 سے 5 راتیں)</p> <p>4۔ ہمیشہ یا تقریباً ہمیشہ (ہفتہ میں 3 سے 5 راتیں)</p> <p>8۔ پتہ نہیں</p> <p>اگر جواب 0 ہو تو سوال نمبر 7 پر جائیں</p> | <p>5</p> <p>آپ کس کثرت سے خراٹے لیتے ہیں؟</p>                                                                                                       |
| <p>1۔ گھری سانوں سے کچھ زیادہ</p> <p>2۔ تقریباً اتنی بلند جیسے باتیں کرنا</p> <p>3۔ باتیں کرنے سے زیادہ</p> <p>4۔ بہت زیادہ بلند (بند دروازے سے باہر سنی جاسکتی ہے)</p> <p>8۔ پتہ نہیں</p>                                                                                          | <p>6</p> <p>آپ کے خراٹوں کی آواز کتنی بلند ہے؟</p>                                                                                                  |
| <p>1۔ ہاں</p> <p>2۔ نہیں</p> <p>8۔ پتہ نہیں</p> <p>اگر جواب 2 یا 8 ہو تو سوال نمبر 9 پر جائیں</p>                                                                                                                                                                                   | <p>7</p> <p>جو آپ نے محسوس کیا ہو یا گھروالوں نے آپ کو بتایا ہو اس کی بنیاد پر کیا ایسے مواقع آئے ہیں کہ آپ نیند میں سانس لینا بند کر دیتے ہیں؟</p> |
| <p>1۔ بہت کم (ہفتہ میں ایک رات سے کم)</p> <p>2۔ کبھی کبھار (ہفتہ میں 1 سے 2 راتیں)</p> <p>3۔ اکثر (ہفتہ میں 3 سے 5 راتیں)</p> <p>4۔ ہمیشہ یا تقریباً ہمیشہ (ہفتہ میں 3 سے 5 راتیں)</p> <p>8۔ پتہ نہیں</p>                                                                           | <p>8</p> <p>ہفتے میں کتنی دفعہ آپ کو ایسا محسوس ہوتا ہے جیسے نیند میں آپ کی سانس رک گئی ہو؟</p>                                                     |
| <p>1۔ ہاں</p> <p>2۔ نہیں</p> <p>8۔ پتہ نہیں</p> <p>(اگر جواب 1 ہو تو سوال نمبر 11 پر، اگر جواب 2 یا 8 ہو تو سوال نمبر 10 پر جائیں)</p>                                                                                                                                              | <p>9</p> <p>کیا آپ کو کبھی کسی ڈاکٹر نے بتایا ہے کہ آپ کو ایسی بیماری ہے جس میں نیند میں سانس رک جاتی ہے؟</p>                                       |
| <p>1۔ ہاں</p> <p>2۔ نہیں</p> <p>8۔ پتہ نہیں</p> <p>(اگر جواب 2 یا 8 ہو تو سوال نمبر 11 پر جائیں)</p>                                                                                                                                                                                | <p>10</p> <p>کیا آپ کو کبھی کسی ڈاکٹر نے بتایا ہے کہ آپ کو نیند کی کوئی اور بیماری ہے؟</p>                                                          |
| <p>10a</p> <p>اگر اوپر والے سوال کا جواب ہاں ہے تو برائے مہربانی اس بیماری کی وضاحت کریں</p>                                                                                                                                                                                        |                                                                                                                                                     |
| <p>1۔ ہاں</p> <p>2۔ نہیں</p>                                                                                                                                                                                                                                                        | <p>11</p> <p>کیا آپ عموماً نیند کے دوران آکسیجن تھراپی کرتے ہیں؟</p> <p>(ماسک یا ناک میں کینولا کے ذریعے آکسیجن فراہم ہونا)</p>                     |
| <p>1۔ کبھی نہیں</p> <p>2۔ کبھی کبھار</p> <p>3۔ عموماً</p>                                                                                                                                                                                                                           | <p>12</p> <p>پچھلے ایک سال کے دوران کتنی دفعہ آپ کے گھر کا کوئی فرد یا افراد اس کمرے کے قریب رہے ہیں جہاں آپ سوئے ہوئے ہوں؟</p>                     |

|    |                                                                                                                                                                                                                                                                                                   |
|----|---------------------------------------------------------------------------------------------------------------------------------------------------------------------------------------------------------------------------------------------------------------------------------------------------|
| 13 | کتنا امکان ہے کہ مندرجہ ذیل حالات میں آپکو نیند آئے اور آپکی آنکھ لگ جائے؟ (صرف تھکاوٹ نہیں) مندرجہ ذیل کوڈز کے مطابق بتائیں۔<br>1- کوئی امکان نہیں 2- تھوڑا سا امکان ہے 3- پچاس فیصد امکان ہے 4- بہت زیادہ امکان ہے<br>(اگر آپ کسی اسی حالت سے نہیں گزرے تو برائے مہربانی اپنے اندازے سے بتائیں) |
| A  | بیٹھ کر پڑھنا                                                                                                                                                                                                                                                                                     |
| B  | ٹی۔وی دیکھنا                                                                                                                                                                                                                                                                                      |
| C  | کسی جگہ پر آرام سے بیٹھنا (جیسے تھیٹر یا کس میٹنگ میں)                                                                                                                                                                                                                                            |
| D  | گازری میں سواری کے طور پر ایک گھنٹے تک بغیر رکے سفر کرنا                                                                                                                                                                                                                                          |
| E  | اگر حالات اجازت دیں تو دوپہر میں آرام کیلئے لیٹنا۔                                                                                                                                                                                                                                                |
| F  | بیٹھ کر کسی سے باتیں کرنا۔                                                                                                                                                                                                                                                                        |
| G  | دوپہر کے کھانے کے بعد خاموشی سے بیٹھنا۔                                                                                                                                                                                                                                                           |
| H  | گازری میں، جب گازی چند منٹ کیلئے ٹریفک میں رکی ہو۔                                                                                                                                                                                                                                                |
| I  | رات کے کھانے کے وقت کھانے کی میز پر                                                                                                                                                                                                                                                               |
| J  | گازی چلائے ہوئے                                                                                                                                                                                                                                                                                   |
| 14 | کیا آپ کبھی اسپرین یا ایسی دوائی جس میں اسپرین ہو استعمال کرتے ہیں؟.....<br>1- کبھی نہیں<br>2- ہفتے میں ایک دفعہ سے کم<br>3- ہفتے میں ایک یا دو دفعہ<br>4- ہر دوسرے دن<br>5- روزانہ<br>8- پتہ نہیں<br>9- ماضی میں استعمال کرتے تھے (پچھلے 12 مہینوں میں)                                          |
| 15 | کیا آپ گازی چلائے ہیں؟.....<br>1- ہاں<br>2- نہیں                                                                                                                                                                                                                                                  |
| 16 | اگر اوپر والے سوال کا جواب ہاں ہے تو مندرجہ ذیل سوالات پوچھیں ورنہ پارٹ E پر جائیں۔                                                                                                                                                                                                               |
| A  | کتنے سالوں سے آپ گازی چلا رہے ہیں؟.....                                                                                                                                                                                                                                                           |
| B  | کتنے وقت کے لئے آپ گازی چلائے ہیں؟.....<br>1- روزانہ<br>2- کبھی کبھار<br>3- بہت کم / کبھی نہیں                                                                                                                                                                                                    |
| C  | جب سے آپ گازی چلانا شروع کی ہے تب سے اب تک آپ گازی چلائے ہوئے کتنے حادثات کا شکار ہوئے ہیں؟                                                                                                                                                                                                       |
| D  | پچھلے ایک سال کے دوران گازی چلائے ہوئے کتنے حادثات کا شکار ہوئے ہیں؟                                                                                                                                                                                                                              |

PART-E

DIET

غذا/خوراک کے بارے میں

|   |                                                                         |                                                                                                                                                          |                                                                                                                  |
|---|-------------------------------------------------------------------------|----------------------------------------------------------------------------------------------------------------------------------------------------------|------------------------------------------------------------------------------------------------------------------|
| 1 | کیا آپ صرف سبزیاں کھاتے ہیں؟ (کسی قسم کا گوشت یا انڈے بالکل نہیں کھاتے) | 1-ہاں<br>2-نہیں                                                                                                                                          | <input type="checkbox"/>                                                                                         |
| 2 | کیا آپ انڈے کھاتے ہیں؟                                                  | 1-ہاں<br>2-نہیں                                                                                                                                          | <input type="checkbox"/>                                                                                         |
| 3 | کیا آپ کسی خاص قسم کی غذا کھاتے ہیں؟ (مثلاً پرہیزی کھانا)               | 1-ہاں<br>2-نہیں                                                                                                                                          | <input type="checkbox"/><br>اگر جواب 2 ہو سوال نمبر 6 پر جائیں                                                   |
| 4 | اگر ہاں تو آپ کس قسم کی غذا کھا رہے ہیں؟                                | 1-ہاں 2-نہیں<br>شوگر/زیادہ بیٹیس کی مخصوص غذا<br>کم چربی / کم چکنائی والی غذا<br>زیادہ فائبر والی غذا<br>کم نمک والی غذا<br>وزن کم کرنے والی غذا<br>دیگر | <input type="checkbox"/><br>دیگر کی وضاحت کریں                                                                   |
| 5 | کتنے عرصہ سے آپ یہ (مندرجہ بالا) مخصوص غذا کھا رہے ہیں؟                 | زیادہ سے زیادہ عرصہ لکھیں                                                                                                                                | <input type="checkbox"/> <input type="checkbox"/> <input type="checkbox"/> <input type="checkbox"/><br>مہینے سال |
| 6 | آپ کتنی دفعہ استعمال شدہ تیل کو دوبارہ استعمال کرتے ہیں؟                | 1-روزانہ<br>2-ہر دوسرے دن<br>3-ہفتہ میں 1 یا 2 مرتبہ<br>4-ہفتہ میں 1 دفعہ سے کم<br>5-کبھی نہیں                                                           | <input type="checkbox"/>                                                                                         |

5۔ پچھلے ایک سال کے دوران آپ نے کھانے پینے کی مندرجہ ذیل اشیاء کا استعمال کس حساب سے کیا ہے

| نمبر شمار | کھانے پینے کی اشیاء                                                     | کبھی نہیں کھایا یا (✓)<br>مہینے میں ایک دفعہ سے کم | مہینے میں ایک دفعہ | بہتے میں ایک دفعہ | روزانہ |
|-----------|-------------------------------------------------------------------------|----------------------------------------------------|--------------------|-------------------|--------|
| 1         | گوشت (بکرے، دنبے، گائے، بھینس، خرگوش کا گوشت اور ان کا سالن)            |                                                    |                    |                   |        |
| 2         | پولٹری (مرغی، بطخ، بیٹر اور ان کا سالن)                                 |                                                    |                    |                   |        |
| 3         | مغز، نہاری، پائے وغیرہ (جگر، گردے، مغز، دل، نہاری، پائے)                |                                                    |                    |                   |        |
| 4         | مچھلی (میٹھے پانی اور سمندری پانی کی، ڈبے والی نمکین، سوکھی ہوئی مچھلی) |                                                    |                    |                   |        |

| نمبر شمار | کھانے پینے کی اشیاء                                                                                                                | کبھی نہیں کھایا یا (✓)<br>مہینے میں ایک دفعہ سے کم | مہینے میں ایک دفعہ | ہفتے میں ایک دفعہ | روزانہ |
|-----------|------------------------------------------------------------------------------------------------------------------------------------|----------------------------------------------------|--------------------|-------------------|--------|
| 5         | جھینگا، لیکڑا وغیرہ (جھینگا، لیکڑا، مچھلی کے انڈے)                                                                                 |                                                    |                    |                   |        |
| 6         | انڈے (مرعی اور بطخ کے انڈے)                                                                                                        |                                                    |                    |                   |        |
| 7         | دودھ اور دودھ سی۔ بنی ہوئی اشیاء (دودھ، دہی، پنیر، لسی، رائتہ، دودھ والی مشروبات)                                                  |                                                    |                    |                   |        |
| 8         | دودھ سے بنی ہوئی میٹھی غذا (کسٹری، کھویا، فرنی، کھیر، پڈنگ، رس، گدہ، رس ملائی، آئس کریم، اور دیگر)                                 |                                                    |                    |                   |        |
| 9         | تلی ہوئی اشیاء مغربی طرز کے کھانے (فرنچ فرائز، چپس، آکو کے چپس، پیاز، چکن ننگس)                                                    |                                                    |                    |                   |        |
| 10        | تلی ہوئی اشیاء دیسی طرز کے کھانے (سموسے، پاپڑ، پکوزے، نمک پارسے، انڈے والے رول، پوری، کچوری)                                       |                                                    |                    |                   |        |
| 11        | مغربی طرز کے میٹھے کھانے (کیک، بیسٹری، چاکلیٹ، ٹافیاں، بسکٹ)                                                                       |                                                    |                    |                   |        |
| 12        | مشائی (برفی، لڈو، گلاب جامن، حلوہ)                                                                                                 |                                                    |                    |                   |        |
| 13        | ٹھنڈے مشروبات (کیس والی مشروبات، شربت)                                                                                             |                                                    |                    |                   |        |
| 14        | پہل (1) (سٹرابری، پائین اپیل، جامن، سیب)                                                                                           |                                                    |                    |                   |        |
| 15        | پہل (2) (اوپر دیئے گئے پھلوں کے سوا تمام موسمی پہل)                                                                                |                                                    |                    |                   |        |
| 16        | پھلوں کا رس (ہر قسم کے، گھر میں بنے، بازار سے خریدے گئے، تازہ اور جھے ہوئے)                                                        |                                                    |                    |                   |        |
| 17        | ڈرائی فروٹ (مونگ پھلی، بادام، پستہ، اخروٹ، سورج کھی کے بیج)                                                                        |                                                    |                    |                   |        |
| 18        | سبز پتے والی سبزیاں (تمام تازہ سبز پتے والی سبزیاں ساگ، پالک، سلیم)                                                                |                                                    |                    |                   |        |
| 19        | دیگر کچی سبزیاں (ہر قسم کی کچی سبزیاں جو اوپر دیئے گروپ میں شامل نہیں)                                                             |                                                    |                    |                   |        |
| 20        | دالیں (تمام دالیں، چنا، چھولے)                                                                                                     |                                                    |                    |                   |        |
| 21        | اچار اور اچار والے کھانے (اچار، چٹنی)                                                                                              |                                                    |                    |                   |        |
| 22        | دیگر کچی ہوئی سبزیاں (تمام کچی سبزیاں جو اوپر دیئے گروپ میں شامل نہیں)                                                             |                                                    |                    |                   |        |
| 23        | چاول اور کم فائبر والی دیگر اشیاء (اٹلے چاول، تٹے ہوئے چاول، بریانی، پلاو، ادلی، ڈوسہ، سوچی، ساگودانہ، پاستا، شیرمال، تافتان، نان) |                                                    |                    |                   |        |
| 24        | روٹی اور دیگر مکمل اناج (بھوسی والے آٹے کی روٹی، رس، دلہیہ، براون بریڈ)                                                            |                                                    |                    |                   |        |
| 25        | چائے (قہوہ اور دوسرے اقسام کی چائے)                                                                                                |                                                    |                    |                   |        |
| 26        | کافی (دودھ اور بلیک)                                                                                                               |                                                    |                    |                   |        |



### SECTION-3

#### FEMALE REPRODUCTIVE HISTORY

خواتین کی تولیدی معلومات  
(یہ سیکشن صرف خواتین سے پوچھا جائے گا۔ مردوں کیلئے یہ سیکشن چھوڑ کر سیکشن 4 سے پوچھیں)

|                                       |                                                                                                                                         |                                                            |   |
|---------------------------------------|-----------------------------------------------------------------------------------------------------------------------------------------|------------------------------------------------------------|---|
|                                       |                                                                                                                                         | آپ کے اب تک کتنے حمل ہوئے ہیں؟.....                        | 1 |
|                                       |                                                                                                                                         | کس عمر میں آپ کو ماہواری آنا شروع ہوئی؟.....               | 2 |
|                                       | 1- ہاں<br>2- نہیں                                                                                                                       | آج کل آپ کو ماہواری آتی ہے؟                                | 3 |
| اگر جواب 1 ہو تو سوال نمبر 6 پر جائیں |                                                                                                                                         |                                                            |   |
|                                       | 1- حمل سے ہیں<br>2- بچے کو دودھ پلاتی ہیں<br>3- ماہواری آنا بند ہو گئی ہے<br>4- آپریشن کے ذریعے ماہواری بند کروائی ہے<br>5- دیگر وجوہات | اگر نہیں تو کیا وجہ ہے؟.....                               | 4 |
| (دیگر کی وضاحت کریں)<br>.....         |                                                                                                                                         |                                                            |   |
|                                       | سال<br>مہینے                                                                                                                            | اگر ماہواری آنا بند ہو گئی ہے تو کتنے عرصے سے؟.....        | 5 |
|                                       |                                                                                                                                         | حمل روکنے والی کوئی گولیاں یا دوائی استعمال کرتی ہیں؟..... | 6 |
|                                       | 1- ہاں 2- نہیں                                                                                                                          | ماضی میں کبھی استعمال کی<br>اگر ہاں تو کتنے عرصہ تک        |   |
| سال<br>مہینے                          |                                                                                                                                         | آج کل استعمال کرتی ہیں؟.....                               |   |
|                                       | 1- ہاں 2- نہیں                                                                                                                          | اگر ہاں تو کتنے عرصہ تک                                    |   |
| سال<br>مہینے                          |                                                                                                                                         |                                                            |   |

## SECTION-4

### QUALITY OF LIFE

### معیار زندگی

برائے مہربانی نیچے دیئے گئے کوڈز کے مطابق ان جملوں کی نشاندہی کیجئے جو آپکی موجودہ صحت کی بہترین عکاسی کرتے ہیں۔

|                          |                                                                                                                                                                                          |                                                                                                |          |
|--------------------------|------------------------------------------------------------------------------------------------------------------------------------------------------------------------------------------|------------------------------------------------------------------------------------------------|----------|
| <input type="checkbox"/> | <p>1- مجھے چلنے پھرنے میں کوئی مشکل نہیں<br/>2- مجھے چلنے پھرنے میں کوئی مشکل ہوتی ہے<br/>3- میں بالکل چل پھر نہیں سکتا/سکتی</p>                                                         | <p>چلنا پھرنا</p>                                                                              | <p>1</p> |
| <input type="checkbox"/> | <p>1- مجھے اپنی دیکھ بھال خود کرنے میں کوئی<br/>مشکل نہیں<br/>2- مجھے خود نہانے دھونے اور کپڑے پہننے<br/>میں کچھ مشکل ہوتی ہے<br/>3- میں خود نہا دھو اور کپڑے پہن نہیں<br/>سکتا/سکتی</p> | <p>اپنی دیکھ بھال خود کرنا</p>                                                                 | <p>2</p> |
| <input type="checkbox"/> | <p>1- مجھے اپنے روزمرہ کے کام کاج میں کوئی<br/>مشکل نہیں ہوتی<br/>2- مجھے اپنے روزمرہ کے کام کاج میں کچھ مشکل<br/>ہوتی ہے<br/>3- میں اپنے روزمرہ کے کام کاج نہیں کر<br/>سکتا/سکتی</p>    | <p>روزمرہ کی معاملات<br/>(مثلاً کام، پریشانی، گھریلو کام کاج، خاندانی اور تفریحی مصروفیات)</p> | <p>3</p> |
| <input type="checkbox"/> | <p>1- مجھے کوئی درد یا پریشانی نہیں<br/>2- مجھے کچھ درد یا پریشانی ہے<br/>3- مجھے شدید درد یا پریشانی ہے</p>                                                                             | <p>درد/پریشانی</p>                                                                             | <p>4</p> |
| <input type="checkbox"/> | <p>1- مجھے کوئی تشویش یا مایوسی نہیں ہے<br/>2- مجھے کچھ تشویش یا مایوسی ہے<br/>3- مجھے شدید تشویش یا مایوسی ہے</p>                                                                       | <p>تشویش / مایوسی</p>                                                                          | <p>5</p> |

آپکی اچھی یا خراب صحت کا اندازہ کرنے کیلئے آپکی سہولت کیلئے ہم نے ایک پیمانہ (تھرمائیٹر) کی طرح بنایا ہے اس پیمانے میں سو (100) آپکی بہترین اور صفر (0) آپکی بدترین صحت کی نشاندہی کرتا ہے ہم چاہتے ہیں کہ آپ اس پیمانے پر نشاندہی کریں کہ آج کل آپ کے خیال میں آپکی صحت کیسی ہے (بہترین یا بدترین) نیچے دیئے گئے خانے سے ایک لائن لگائیں جو پیمانے پر موجود اس نشان تک ہو جو آپکی موجودہ صحت کی صحیح نشاندہی کرتی ہو۔

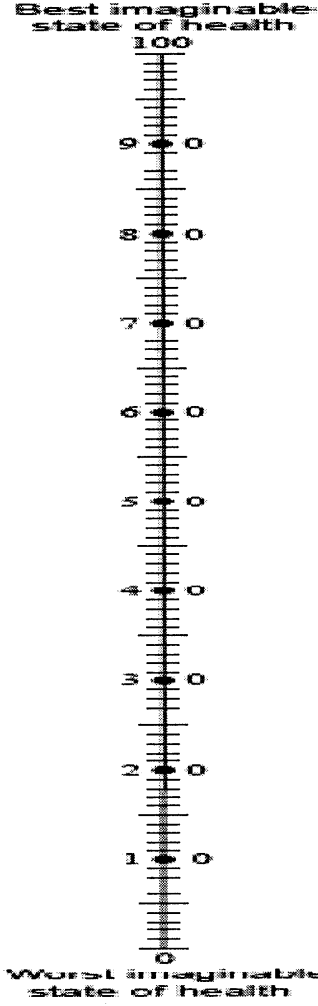

آپکی موجودہ صحت

## SECTION-5

### MEDICAL HISTORY

طبی معلومات

### PART-A

#### CARDIOMETABOLIC DISEASES AND THEIR RISK FACTORS

امراض قلب اور ان کا سبب بننے والے عوامل

|  |                                                                                                                 |                                                                                                                                                      |   |
|--|-----------------------------------------------------------------------------------------------------------------|------------------------------------------------------------------------------------------------------------------------------------------------------|---|
|  |                                                                                                                 | کیا آپ کو کبھی کسی معالج نے بتایا ہے کہ آپ کو مندرجہ ذیل میں سے کوئی بیماری / بیماریاں ہیں؟ (دوران حمل ہونے والے بلڈ پریشر اور شوگر کو شامل نہ کریں) | 1 |
|  | 1- ہاں 2- نہیں 3- پتہ نہیں                                                                                      |                                                                                                                                                      |   |
|  | بلڈ پریشر<br>شوگر / گلیسیمیٹس<br>کولیسٹرول کی زیادتی<br>دل کی بیماری<br>فالج<br>گردوں کی دائمی / Chronic بیماری |                                                                                                                                                      |   |

اگر مندرجہ بالا سوال میں کسی کا جواب ہاں ہے تو B-PART پر جائیں ورنہ پورا B-PART چھوڑ کر C-PART پر جائیں۔

### PART-B

#### DISEASE SPECIFIC QUESTIONS

بیماریوں کے متعلق مخصوص سوالات

#### I- HIGH BLOOD PRESSURE

بلڈ پریشر

( اگر A-PART کے سوال نمبر 1 میں بلڈ پریشر کیلئے جواب ہاں ہے تو یہ سیکشن پوچھیں )

|  |                                                                                                               |                                                                                 |   |
|--|---------------------------------------------------------------------------------------------------------------|---------------------------------------------------------------------------------|---|
|  |                                                                                                               | آپ کو کتنے عرصے سے بلڈ پریشر کی بیماری ہے؟                                      | a |
|  | 1- ہاں 2- نہیں                                                                                                | اس کیلئے آپ فی الحال کیا علاج کروا رہے ہیں؟                                     | b |
|  | خوراک میں تجویز کردہ تبدیلی<br>تجویز کردہ ورزش<br>* یونانی، حکیمی یا دینی علاج<br>انگریزی دوائیاں<br>کچھ نہیں | * (ان میں یوگا، یونانی، ہومیوپیتھک، حکیمی اور جزی بوٹیوں وغیرہ سے علاج شامل ہے) |   |

|                                                                                                   |                                                                                                                                                                                           |                                                                                                 |  |
|---------------------------------------------------------------------------------------------------|-------------------------------------------------------------------------------------------------------------------------------------------------------------------------------------------|-------------------------------------------------------------------------------------------------|--|
| <input type="checkbox"/><br>اگر جواب 4 ہے تو سوال نمبر d کا جواب<br>دیں ورنہ سوال نمبر e پر جائیں | 1- پابندی کے ساتھ<br>2- کبھی کبھار بھول جاتے ہیں<br>3- جب بلڈ پریشر بڑھا ہوا محسوس<br>ہوتا ہے تو دوائی لیتے ہیں<br>4- ایک ماہ سے زیادہ کیلئے چھوڑ دیتے ہیں<br>5- کبھی دوا استعمال نہیں کی | c آپ یہ علاج کتنی پابندی سے کرتے ہیں؟.....                                                      |  |
| <input type="checkbox"/><br>دیگر کی وضاحت کریں                                                    | 1- خرید نہیں سکتے<br>2- برواشت نہیں کر سکتے<br>3- طبیعت صبح ہو گئی ہے<br>4- کوئی وجہ نہیں<br>5- یاد نہیں<br>6- دیگر                                                                       | d دوا علاج چھوڑ دینے کی کیا وجہ ہے؟.....                                                        |  |
| <input type="checkbox"/>                                                                          | 1- ہاں<br>2- نہیں<br>3- پتہ نہیں                                                                                                                                                          | e کیا آپ کے خیال میں آپ کا بلڈ پریشر پوری طرح قابو میں ہے؟.....                                 |  |
| <input type="checkbox"/>                                                                          | 1- ہاں<br>2- نہیں<br>3- پتہ نہیں                                                                                                                                                          | f کیا آپ کے معالج آپ سے کھتے ہیں کہ آپ کا بلڈ پریشر پوری طرح قابو میں ہے؟.....                  |  |
| Systolic.....<br>Diastolic.....<br><input type="checkbox"/>                                       | 1- کتنا<br>2- پتہ نہیں<br>3- یاد نہیں                                                                                                                                                     | g آخری مرتبہ ڈاکٹر سے چیک اپ کروانے پر آپ کا بلڈ پریشر کتنا تھا؟.....                           |  |
| <input type="checkbox"/>                                                                          | 1- 1 ماہ سے کم<br>2- 1 ماہ سے زیادہ<br>3- 3 ماہ سے زیادہ<br>4- 6 ماہ سے کم<br>5- 6 ماہ سے زیادہ                                                                                           | h آپ نے آخری مرتبہ معالج سے کب رجوع کیا تھا؟.....                                               |  |
| <input type="checkbox"/>                                                                          | 1- ہاں<br>2- نہیں<br>3- پتہ نہیں                                                                                                                                                          | i کیا آپ کے پاس بلڈ پریشر سے متعلق طبی ریکارڈ یا نسخے ہیں؟.....                                 |  |
|                                                                                                   | تشخیص:-                                                                                                                                                                                   | j اگر جواب ہاں ہے تو جواب دہندہ سے طبی ریکارڈ یا نسخے دیکھانے کیلئے کہیں اور<br>تشخیص نوٹ کریں۔ |  |
| Systolic.....<br>Diastolic.....                                                                   |                                                                                                                                                                                           | k حالیہ نسخے میں لکھی گئی بلڈ پریشر کو نوٹ کریں۔                                                |  |

## II- DIABETES

### شوگر لڈیا بیٹس

( اگر PART-A کے سوال نمبر 1 میں شوگر کیلئے جواب ہاں ہے تو یہ سیکشن پوچھیں )

| مہینے | سال |                                                                                                                                                                        |                                                                                                                                                  |
|-------|-----|------------------------------------------------------------------------------------------------------------------------------------------------------------------------|--------------------------------------------------------------------------------------------------------------------------------------------------|
|       |     |                                                                                                                                                                        | a آپکو کتنے عرصے سے شوگر لڈیا بیٹس کی بیماری ہے                                                                                                  |
|       |     | خوراک میں تجویز کردہ تبدیلی<br>تجویز کردہ ورزش<br>* یونانی، حکیمی یا دہی علاج<br>انگریزی دوائیاں<br>کچھ نہیں                                                           | b اس کیلئے آپ فی الحال کیا علاج کروا رہے ہیں<br>*(ان میں یوگا، یونانی، ہومیوپیتھک، حکیمی اور جزی بوٹیوں وغیرہ سے علاج شامل ہے)<br>1- ہاں 2- نہیں |
|       |     | 1- پابندی کے ساتھ<br>2- کبھی کبھار بھول جاتے ہیں<br>3- جب شوگر بڑی ہوتی ہے تو دوائی لیتے ہیں<br>4- ایک ماہ سے زیادہ کیلئے چھوڑ دیتے ہیں<br>5- کبھی دوا استعمال نہیں کی | c آپ یہ دوائیاں کتنی پابندی سے لیتے ہیں؟<br>.....                                                                                                |
|       |     | 1- خرید نہیں سکتے<br>2- برداشت نہیں کر سکتے<br>3- طبیعت صبح ہو گئی ہے<br>4- کوئی وجہ نہیں<br>5- یاد نہیں<br>6- دیگر                                                    | d علاج لڈیا بیٹس دینے کی کیا وجہ ہے؟<br>.....                                                                                                    |
|       |     | 1- ہاں<br>2- نہیں<br>3- پتہ نہیں                                                                                                                                       | e کیا آپ کے خیال میں آپکی شوگر لڈیا بیٹس صبح طرح قابو میں ہے؟<br>.....                                                                           |
|       |     | 1- ہاں<br>2- نہیں<br>3- پتہ نہیں                                                                                                                                       | f کیا آپ کے معالج آپ سے کھتے ہیں کہ آپ کی شوگر لڈیا بیٹس پوری طرح قابو میں ہے؟                                                                   |
|       |     | نہار منہ<br>کھانے کے بعد                                                                                                                                               | g آخری مرتبہ معائنہ کرنے پر آپ کی نہار منہ اور کھانے کے بعد کی شوگر کتنی تھی؟                                                                    |
|       |     | 1- 1 ماہ سے کم<br>2- 1 ماہ سے زیادہ<br>3- 3 ماہ سے زیادہ<br>4- 6 ماہ سے کم<br>5- 6 ماہ سے زیادہ                                                                        | h اپنے آخری مرتبہ معالج سے کب رجوع کیا تھا؟<br>.....                                                                                             |

|                                                                                          |              |                                                                                                                                                                |                                                                                                                                    |   |
|------------------------------------------------------------------------------------------|--------------|----------------------------------------------------------------------------------------------------------------------------------------------------------------|------------------------------------------------------------------------------------------------------------------------------------|---|
|                                                                                          |              | 1-ہاں<br>2-نہیں<br>3-پتہ نہیں                                                                                                                                  | کیا آپ کے پاس شوگر لڑیا بیٹس سے متعلق طبی ریکارڈ یا نسخے ہیں؟.....                                                                 | i |
|                                                                                          |              | تشخیص:-                                                                                                                                                        | اگر جواب ہاں ہے تو جواب دہندہ سے طبی ریکارڈ یا نسخے دیکھانے کیلئے کہیں اور تشخیص نوٹ کریں۔                                         | j |
| نہار منہ.....<br>کھانے کے بعد.....                                                       |              |                                                                                                                                                                | حالیہ نسخے میں لکھی گئی نہار منہ اور کھانے کے بعد کی شوگر نوٹ کریں                                                                 | k |
| Part-D بھی مکمل کریں۔                                                                    |              |                                                                                                                                                                |                                                                                                                                    |   |
| <b>III- HIGH BLOOD CHOLESTEROL</b>                                                       |              |                                                                                                                                                                |                                                                                                                                    |   |
| <b>خون میں چکنائی</b>                                                                    |              |                                                                                                                                                                |                                                                                                                                    |   |
| (اگر PART-A کے سوال نمبر 1 میں کولیسٹرول کی زیادتی کیلئے جواب ہاں ہے تو یہ سیکشن پوچھیں) |              |                                                                                                                                                                |                                                                                                                                    |   |
|                                                                                          | مہینے<br>سال |                                                                                                                                                                | آپ کو کتنے عرصے سے کولیسٹرول کی زیادتی کی بیماری ہے؟.....                                                                          | a |
|                                                                                          |              | 1-ہاں 2-نہیں<br>خوراک میں تجویز کردہ تبدیلی<br>تجویز کردہ ورزش<br>* یونانی، حکیمی یا دہی علاج<br>انگریزی دوائیاں<br>کچھ نہیں                                   | اس کیلئے آپ فی الحال کیا علاج کروا رہے ہیں؟.....<br>*(ان میں یوگا، یونانی، ہومیوپیتھک، حکیمی اور جزی بوٹیوں وغیرہ سے علاج شامل ہے) | b |
|                                                                                          |              | 1- پابندی کے ساتھ<br>2- کبھی کبھار بھول جاتے ہیں<br>3- جب کولیسٹرول بڑھا ہوا ہوتا ہے<br>4- ایک ماہ سے زیادہ کیلئے چھوڑ دیتے ہیں<br>5- کبھی دوا استعمال نہیں کی | آپ یہ دوائیاں کتنی پابندی سے لیتے ہیں؟.....                                                                                        | c |
|                                                                                          |              | 1- خرید نہیں سکتے<br>2- برداشت نہیں کر سکتے<br>3- طبیعت صبح ہو گئی ہے<br>4- کوئی وجہ نہیں<br>5- ماد نہیں<br>6- دیگر                                            | دوا چھوڑ دینے کی کیا وجہ ہے؟.....                                                                                                  | d |
|                                                                                          |              | 1-ہاں<br>2-نہیں<br>3-پتہ نہیں                                                                                                                                  | کیا آپ کے خیال میں آپ کا کولیسٹرول صبح طرح قابو میں ہے؟.....                                                                       | e |

|                                                                                    |                                                                                                                                                |                                                                                                |   |
|------------------------------------------------------------------------------------|------------------------------------------------------------------------------------------------------------------------------------------------|------------------------------------------------------------------------------------------------|---|
|                                                                                    | 1- ہاں<br>2- نہیں<br>3- پتہ نہیں                                                                                                               | کیا آپ کے معالج آپ سے کھتے ہیں کہ آپ کا کولیسٹرول پوری طرح قابو میں ہے؟....                    | f |
| -----mg/dl                                                                         |                                                                                                                                                | آخری مرتبہ چیک کرنے پر آپ کے کولیسٹرول کی مقدار کتنی تھی؟.....                                 | g |
|                                                                                    | 1-1 ماہ سے کم<br>1-2 ماہ سے زیادہ<br>3-3 ماہ سے زیادہ<br>4-6 ماہ سے کم<br>5-6 ماہ سے زیادہ                                                     | آپنے آخری مرتبہ معالج سے کب رجوع کیا تھا؟.....                                                 | h |
|                                                                                    | 1- ہاں<br>2- نہیں<br>3- پتہ نہیں                                                                                                               | کیا آپ کے پاس کولیسٹرول کی زیادتی سے متعلق طبی ریکارڈ یا نئے ہیں؟.....                         | i |
|                                                                                    | تشخیص:-                                                                                                                                        | اگر جواب ہاں ہے تو جواب دہندہ سے طبی ریکارڈ یا نئے دیکھانے کیلئے کہیں اور تشخیص نوٹ کریں       | j |
| -----mg/dl                                                                         |                                                                                                                                                | حالیہ نئے میں لکھی گئی کولیسٹرول کی مقدار نوٹ کریں                                             | k |
| <b>IV-HEART DISEASE</b>                                                            |                                                                                                                                                |                                                                                                |   |
| <b>دل کی بیماری</b>                                                                |                                                                                                                                                |                                                                                                |   |
| ( اگر part-A کے سوال نمبر 1 میں دل کی بیماری کیلئے جواب ہاں ہے تو یہ سیکشن پڑھیں ) |                                                                                                                                                |                                                                                                |   |
|                                                                                    | 1-1 سال سے کم ہوا ہے<br>2-1 سے 5 سال ہوئے ہیں<br>3-5 سال سے زیادہ ہوئے ہیں                                                                     | آپکو پہلی مرتبہ کب معلوم ہوا کہ آپکو دل کی بیماری ہے؟.....                                     | A |
|                                                                                    | 1- دل کا دورہ<br>2- انجائنا<br>3- دل کی کمزوری لہارٹ فیل ہونا<br>4- دل کے والو بند ہیں<br>5- دل میں سوراخ<br>6- دیگر<br>7- معالج نے نہیں بتایا | اپکے معالج نے آپکو کیا بتایا تھا کہ یہ کونسی بیماری ہے؟.....<br>(ایک سے زائد جوابات آسکتے ہیں) | b |
|                                                                                    | سال                                                                                                                                            | کس عمر میں آپکو دل کا پہلا دورہ پڑا؟.....                                                      | c |
|                                                                                    | 1- ہاں<br>2- نہیں                                                                                                                              | کیا آپ علاج کیلئے ہسپتال میں داخل رہے؟.....                                                    | d |



|                                                                                                                                          |                                                                                                                                                     |                                                                                                                                             |   |
|------------------------------------------------------------------------------------------------------------------------------------------|-----------------------------------------------------------------------------------------------------------------------------------------------------|---------------------------------------------------------------------------------------------------------------------------------------------|---|
| <input type="checkbox"/>                                                                                                                 | 1- ہاں<br>2- نہیں                                                                                                                                   | کیا آپ کو دوبارہ دل کے دورے پڑے؟.....                                                                                                       | e |
| <input type="checkbox"/>                                                                                                                 | 1- ہاں<br>2- نہیں                                                                                                                                   | کیا آپ دوسرے دورے کے علاج کیلئے ہسپتال میں داخل رہے؟.....                                                                                   | f |
| <input type="checkbox"/><br><input type="checkbox"/><br><input type="checkbox"/><br><input type="checkbox"/><br><input type="checkbox"/> | 1- ہاں 2- نہیں<br>خوراک میں تجویز کردہ تبدیلی<br>تجویز کردہ ورزش<br>* یونانی، حکیمی یا دیسی علاج<br>انگریزی دوائیاں<br>کچھ نہیں                     | دل کی بیماری کیلئے آپ فی الحال کیا علاج کر رہے ہیں؟.....<br>* (ان میں یوگا، یونانی، ہومیوپیتھک، حکیمی اور جزی بوٹیوں وغیرہ سے علاج شامل ہے) | g |
| <input type="checkbox"/><br>اگر جواب 4 ہے تو سوال نمبر 4 کا جواب دیں<br>ورنہ سوال نمبر 4 پر جائیں)                                       | 1- پابندی کے ساتھ<br>2- کبھی کبھار بھول جاتے ہیں<br>3- جب طبیعت ٹھک نہ ہو<br>4- ایک ماہ سے زیادہ کیلئے چھوڑ دیتے ہیں<br>5- کبھی دوا استعمال نہیں کی | آپ یہ دوائیاں کتنی پابندی سے لیتے ہیں؟.....                                                                                                 | h |
| <input type="checkbox"/><br>(دیگر کی وضاحت کریں)<br>.....                                                                                | 1- خرید نہیں سکتے<br>2- برداشت نہیں کر سکتے<br>3- طبیعت صبح ہو گئی ہے<br>4- کوئی وجہ نہیں<br>5- یاد نہیں<br>6- دیگر                                 | دوا چھوڑ دینے کی کیا وجہ ہے؟.....                                                                                                           | i |
| <input type="checkbox"/>                                                                                                                 | 1- 1 ماہ سے کم<br>2- 1 ماہ سے زیادہ<br>3- 3 ماہ سے زیادہ<br>4- 6 ماہ سے کم<br>5- 6 ماہ سے زیادہ                                                     | آپ لے سہری مرتبہ معالج سے کب رجوع کیا تھا؟.....                                                                                             | j |
| <input type="checkbox"/>                                                                                                                 | 1- ہاں<br>2- نہیں<br>3- پتہ نہیں                                                                                                                    | کیا آپ کے پاس دل کی بیماری سے متعلق طبی ریکارڈ یا نسخے موجود ہیں؟.....                                                                      | k |
|                                                                                                                                          | تشخیص:-                                                                                                                                             | اگر جواب ہاں ہے تو جواب دہندہ سے طبی ریکارڈ یا نسخے دیکھانے کیلئے کہیں اور<br>تشخیص نوٹ کریں                                                | l |

## V- STROKE

### فلج

( اگر PART-A کے سوال نمبر 1 میں فلج کیلئے جواب ہاں ہے تو یہ سیکشن پوچھیں )

|   | سال |                                                                                                                                                                                                                                      |                                                                                                             |
|---|-----|--------------------------------------------------------------------------------------------------------------------------------------------------------------------------------------------------------------------------------------|-------------------------------------------------------------------------------------------------------------|
| □ | □   | 1- ہاں<br>2- نہیں                                                                                                                                                                                                                    | a<br>جب آپکو فلج کا اثر ہوا تو اس وقت آپکی کیا عمر تھی؟.....<br>کیا جسم کے کسی حصہ میں معذوری باقی ہے؟..... |
| □ | □   | 1- ہاں<br>2- نہیں<br>ٹانگ اپوں کا فلج<br>ہاتھ بازو کا فلج<br>ٹانگ اپوں کی کمزوری<br>ہاتھ بازو کی کمزوری<br>گفتگو کی خرابی<br>نظر کی خرابی<br>پیشاب کو کنٹرول نہ کر پانا<br>ان کے علاوہ جسم کے کسی دیگر حصے کی<br>کمزوری (وضاحت کریں) | c<br>اگر ہاں تو کونسا حصہ متاثر ہے؟.....                                                                    |
| □ | □   | 1- ہاں<br>2- نہیں                                                                                                                                                                                                                    | d<br>کیا فلج کے اثر کے بعد آپکو کسی دوا کو جاری رکھنے کا مشورہ دیا گیا؟.....                                |
| □ | □   | 1- باہندی کے ساتھ<br>2- کبھی کبھار بھول جاتے ہیں<br>3- جب طبیعت خراب ہو تب لیتے ہے<br>4- ایک ماہ سے زیادہ کیلئے چھوڑ دیتے ہیں<br>5- کبھی دوا استعمال نہیں کی                                                                         | e<br>اگر ہاں تو آپ یہ دوائیاں کتنی باہندی سے لیتے ہیں؟.....                                                 |
| □ | □   | 1- خرید نہیں سکتے<br>2- برداشت نہیں کر سکتے<br>3- طبیعت صبح ہو گئی ہے<br>4- کوئی وجہ نہیں<br>5- یاد نہیں<br>6- دیگر                                                                                                                  | f<br>دوا چھوڑ دینے کی کیا وجہ ہے؟.....                                                                      |

|  |                                                                                                                   |                                                                                                  |   |
|--|-------------------------------------------------------------------------------------------------------------------|--------------------------------------------------------------------------------------------------|---|
|  | <p>1-1 ماہ سے کم</p> <p>1-2 ماہ سے زیادہ</p> <p>3-3 ماہ سے زیادہ</p> <p>4-6 ماہ سے کم</p> <p>5-6 ماہ سے زیادہ</p> | <p>آپنے آخری مرتبہ علاج سے کب رجوع کیا تھا؟.....</p>                                             | g |
|  | <p>1-ہاں</p> <p>2-نہیں</p> <p>3-پتہ نہیں</p>                                                                      | <p>کیا آپکے پاس فالج سے متعلق طبی ریکارڈ یا نسخے موجود ہیں؟.....</p>                             | h |
|  | <p>تشخیص:-</p>                                                                                                    | <p>اگر جواب ہاں ہے تو جواب دہندہ سے طبی ریکارڈ یا نسخے دیکھانے کیلئے کہیں اور تشخیص نوٹ کریں</p> | i |

## VI- KIDNEY DISEASE

### گردوں کی دائمی (Chronic) بیماری

(اگر PART-A کے سوال نمبر 1 میں گردوں کی دائمی بیماری کیلئے جواب ہاں ہے تو یہ سیکشن پوچھیں)

|  |     |                                                                                                                                                                                |                                                                                                                                                                 |   |
|--|-----|--------------------------------------------------------------------------------------------------------------------------------------------------------------------------------|-----------------------------------------------------------------------------------------------------------------------------------------------------------------|---|
|  | سال |                                                                                                                                                                                | <p>کس عمر میں آپکو گردوں کی دائمی بیماری کی تشخیص ہوئی؟.....</p>                                                                                                | a |
|  |     | <p>1-ہاں 2-نہیں</p> <p>خوراک میں تجویز کردہ تبدیلی</p> <p>تجویز کردہ ورزش</p> <p>* یونانی، حکیمی یا دہیسی علاج</p> <p>انگریزی دوائیاں</p> <p>کچھ نہیں</p>                      | <p>گردوں کی دائمی بیماری کیلئے آپ فی الحال کیا علاج کر رہے ہیں؟.....</p> <p>* (ان میں یوگا، یونانی، ہومیوپیتھک، حکیمی اور جزی بوٹیوں وغیرہ سے علاج شامل ہے)</p> | b |
|  |     | <p>1-باندھی کے ساتھ</p> <p>2-کبھی کبھار بھول جاتے ہیں</p> <p>3-جب طبیعت خراب ہو تب لیتے ہے</p> <p>4-ایک ماہ سے زیادہ کیلئے چھوڑ دیتے ہیں</p> <p>5-کبھی دوا استعمال نہیں کی</p> | <p>یہ علاج آپ کتنی باقاعدگی سے کر رہے ہیں؟.....</p>                                                                                                             | c |
|  |     | <p>1-خرید نہیں سکتے</p> <p>2-برداشت نہیں کر سکتے</p> <p>3-طبیعت صبح ہو گئی ہے</p> <p>4-کوئی وجہ نہیں</p> <p>5-یاد نہیں</p> <p>6-دیگر</p>                                       | <p>دوا چھوڑ دینے کی کیا وجہ ہے؟.....</p>                                                                                                                        | d |

|                          |                                                                                            |                                                                                           |   |
|--------------------------|--------------------------------------------------------------------------------------------|-------------------------------------------------------------------------------------------|---|
| <input type="checkbox"/> | 1-1 ماہ سے کم<br>1-2 ماہ سے زیادہ<br>3-3 ماہ سے زیادہ<br>4-6 ماہ سے کم<br>5-6 ماہ سے زیادہ | آپنے آخری مرتبہ معالج سے کب رجوع کیا تھا؟.....                                            | e |
| <input type="checkbox"/> | 1- ہاں<br>2- نہیں<br>3- پتہ نہیں                                                           | کیا آپکے پاس گردوں کی دائمی بیماری سے متعلق طبی ریکارڈ یا نسخے موجود ہیں؟.....            | f |
|                          | تشخیص:-                                                                                    | اگر جواب ہاں ہے تو جواب دہندہ سے طبی ریکارڈ یا نسخے دیکھانے کیلئے کہیں اور تشخیص نوٹ کریں | g |

**PART-C**

**ANGINA, PERIPHERAL VASCULAR DISEASE AND HEART FAILURE**

**انجائنا، رگوں کی بیماری اور دل کی خرابیاں (ہارٹ فیل)**

**I- ANGINA**

**انجائنا**

|                                                                                                                                          |                                                                                                                                    |                                                                                                                                                                                       |   |
|------------------------------------------------------------------------------------------------------------------------------------------|------------------------------------------------------------------------------------------------------------------------------------|---------------------------------------------------------------------------------------------------------------------------------------------------------------------------------------|---|
|                                                                                                                                          |                                                                                                                                    | آپکوان میں سے کوئی علامت موجود ہے؟.....                                                                                                                                               | a |
| <input type="checkbox"/><br><input type="checkbox"/><br><input type="checkbox"/><br><input type="checkbox"/><br><input type="checkbox"/> | 1- ہاں 2- نہیں<br>دل کی دھڑکن محسوس کرنا<br>سینے میں درد<br>سانس کا پھولنا<br>تھکن اکثر زوری<br>سینے میں دباؤ / بیماری پن اے پیٹنی | اگر سب کے لئے جواب 2 ہو سوال نمبر m پر جائیں                                                                                                                                          |   |
|                                                                                                                                          |                                                                                                                                    | کیا *مشقت کے دوران آپکو مندرجہ ذیل کوئی علامت سینے کے آس پاس، بازو، کاندھے، گردن، نچلے جہزے میں، پیٹ یا کمر کے اوپر کے حصے میں محسوس ہوئی۔ *تیز چلنا، سیرھیاں چڑھنا، وزن اٹھانا وغیرہ | b |
| <input type="checkbox"/><br><input type="checkbox"/><br><input type="checkbox"/><br><input type="checkbox"/><br><input type="checkbox"/> | 1- ہاں 2- نہیں<br>درد<br>بوجھل پن / بیماری پن<br>دباؤ<br>بے چینی<br>بے حسی / سن ہونا                                               | اگر سب کے لئے جواب 2 ہو سوال نمبر d پر جائیں                                                                                                                                          |   |

c علامت زیادہ تر کس حصے میں محسوس ہوتی ہیں (برائے مہربانی جگہ کا تعین نیچے دی گئی تصویر سے شناخت کریں)  
اصنافی نمبر سینے کے پیچھے۔ 11 گردن کے پیچھے۔ 12

|                                                                                                                                                                                  |                             |                                                          |  |  |  |  |  |  |                                                                                                                                              |  |  |  |  |  |
|----------------------------------------------------------------------------------------------------------------------------------------------------------------------------------|-----------------------------|----------------------------------------------------------|--|--|--|--|--|--|----------------------------------------------------------------------------------------------------------------------------------------------|--|--|--|--|--|
| جگہ                                                                                                                                                                              | 1-1 بائیں-2-2 نہیں<br>علامت | ورد<br>بوجھل پن / بجاری پن<br>بے چینی<br>بے حس / سن ہونا |  |  |  |  |  |  |                                                                                                                                              |  |  |  |  |  |
| <table border="1" style="width: 100px; height: 100px;"> <tr><td></td><td></td></tr> <tr><td></td><td></td></tr> <tr><td></td><td></td></tr> <tr><td></td><td></td></tr> </table> |                             |                                                          |  |  |  |  |  |  | <table border="1" style="width: 100px; height: 100px;"> <tr><td></td></tr> <tr><td></td></tr> <tr><td></td></tr> <tr><td></td></tr> </table> |  |  |  |  |  |
|                                                                                                                                                                                  |                             |                                                          |  |  |  |  |  |  |                                                                                                                                              |  |  |  |  |  |
|                                                                                                                                                                                  |                             |                                                          |  |  |  |  |  |  |                                                                                                                                              |  |  |  |  |  |
|                                                                                                                                                                                  |                             |                                                          |  |  |  |  |  |  |                                                                                                                                              |  |  |  |  |  |
|                                                                                                                                                                                  |                             |                                                          |  |  |  |  |  |  |                                                                                                                                              |  |  |  |  |  |
|                                                                                                                                                                                  |                             |                                                          |  |  |  |  |  |  |                                                                                                                                              |  |  |  |  |  |
|                                                                                                                                                                                  |                             |                                                          |  |  |  |  |  |  |                                                                                                                                              |  |  |  |  |  |
|                                                                                                                                                                                  |                             |                                                          |  |  |  |  |  |  |                                                                                                                                              |  |  |  |  |  |
|                                                                                                                                                                                  |                             |                                                          |  |  |  |  |  |  |                                                                                                                                              |  |  |  |  |  |

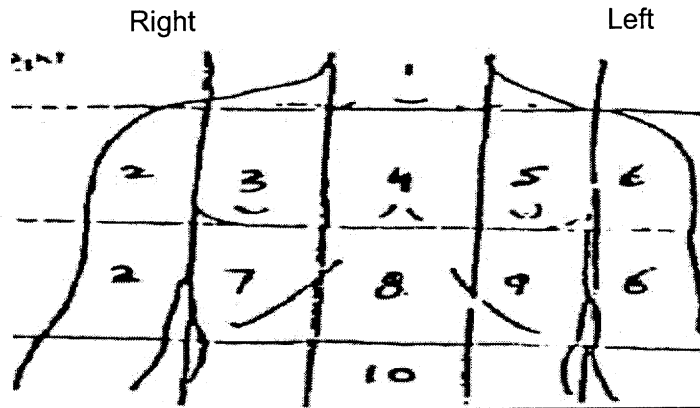

|                          |                       |                                                                 |   |
|--------------------------|-----------------------|-----------------------------------------------------------------|---|
| <input type="checkbox"/> | 1-1 بائیں<br>2-2 نہیں | کیا اوپر دی گئی علامت آپکو کسی اور حصے میں محسوس ہوئی ہیں؟..... | d |
| علامت-----<br>جگہ-----   |                       | اگر ہاں تو وضاحت کریں                                           |   |

سوال نمبر e سے ایک صرف اس صورت میں پوچھیں اگر سوال نمبر b اور c میں کسی کا جواب 1 ہے ورنہ سوال نمبر m پر جائیں۔

|                          |                                                                            |                                                                                                                                                      |   |
|--------------------------|----------------------------------------------------------------------------|------------------------------------------------------------------------------------------------------------------------------------------------------|---|
| <input type="checkbox"/> | 1-1 بائیں<br>2-2 نہیں<br>3- چڑھائی / بلندی پر نہیں چلتے تیز نہیں چلتے      | کیا اوپر دی گئی علامت یا سانس کا پھولنا یا دل کی دھڑکن کا محسوس ہونا آپکو چڑھائی / بلندی پر چلنے یا سیریاں چڑھنے یا تیز چلنے سے محسوس ہوتی ہیں؟..... | e |
| <input type="checkbox"/> | 1-1 بائیں<br>2-2 نہیں                                                      | کیا یہ علامت آپکو ہموار زمین پر معمول کی رفتار سے چلنے پر محسوس ہوتی ہیں؟.....                                                                       | f |
| <input type="checkbox"/> | 1-1 بائیں<br>2-2 نہیں                                                      | کیا یہ علامت آپکو آرام کے دوران یا کھانے کے بعد محسوس ہوتی ہیں؟.....                                                                                 | g |
| <input type="checkbox"/> | 1- رک جاتے ہیں<br>2- رفتار کم کر دیتے ہیں<br>3- اسی رفتار سے چلتے رہتے ہیں | اگر آپکو مشقت کے دوران یہ علامت محسوس ہوتی ہیں تو آپ کیا کرتے ہیں؟.....                                                                              | h |

|  |       |                                                                               |                                                                                                              |   |
|--|-------|-------------------------------------------------------------------------------|--------------------------------------------------------------------------------------------------------------|---|
|  |       | 1- ہاں<br>2- نہیں                                                             | رفتار کم کرنے سے یا رک جانے سے کیا یہ علامت چلی جاتی ہے؟.....                                                | i |
|  |       | 1- تین منٹ سے کم<br>2- تین سے بیس منٹ<br>3- بیس منٹ سے زیادہ                  | اگر ہاں تو عام طور پر یہ علامت کتنی جلدی چلی جاتی ہے؟.....                                                   | j |
|  |       | 1- ہاں<br>2- نہیں                                                             | کیا آپ اس علامت سے آرام حاصل کرنے کیلئے عموماً زبان کے نیچے گولی رکھتے ہیں؟..                                | k |
|  |       | 1- دو منٹ سے کم<br>2- دو سے پانچ منٹ<br>3- چھ سے دس منٹ<br>4- دس منٹ سے زیادہ | اگر ہاں ہے تو کتنی جلدی یہ علامت دور ہو جاتی ہے؟.....                                                        | l |
|  |       | 1- ہاں<br>2- نہیں                                                             | کیا آپ کو کبھی سینے کے سامنے والے حصے میں شدید درد یا بے چینی محسوس ہوئی ہے جو 30 منٹ یا اس سے زیادہ رہی ہو؟ | m |
|  |       |                                                                               | اگر ہاں تو کیا اس درد یا بے چینی کے ساتھ مندرجہ ذیل علامات بھی تھیں؟.....                                    | n |
|  |       | 1. ہاں<br>2. نہیں                                                             | جسم کا ٹھنڈا پڑ جانا<br>سانس میں مشکل<br>پیسے آنے                                                            |   |
|  | سال   |                                                                               | جب آپ کو سینے میں شدید درد ہوا اس وقت آپ کی کیا عمر تھی؟.....                                                | o |
|  | تعداد |                                                                               | اس طرح کے دورے آپ کو کتنی مرتبہ ہوئے ہیں؟.....                                                               | p |
|  |       | 1- ہاں<br>2- نہیں                                                             | کیا آپ نے کبھی ECG/لول کی بیٹی لکوائی ہے؟.....                                                               | q |
|  |       | 1- ہاں<br>2- نہیں                                                             | کیا آپ نے درد کے لئے کسی معالج سے رابطہ کیا ہے؟.....                                                         | r |

## II- PERIPHERAL VASCULAR DISEASE

### رگوں کی بیماری (جوڑوں کا درد شامل نہیں)

|  |  |                                                                      |                                                              |   |
|--|--|----------------------------------------------------------------------|--------------------------------------------------------------|---|
|  |  | 1- ہاں<br>2- نہیں                                                    | کیا آپ کو چلنے کے دوران کسی ٹانگ میں درد محسوس ہوتا ہے؟..... | a |
|  |  | 1- ٹانگ کے پچھلے حصے میں<br>2- ٹانگ کے پچھے والا حصہ متاثر نہیں ہوتا | اگر ہاں تو ٹانگ کے کس حصے میں محسوس ہوتا ہے؟.....            | b |

|                          |                                                               |                                                             |   |
|--------------------------|---------------------------------------------------------------|-------------------------------------------------------------|---|
| <input type="checkbox"/> | 1- ہاں<br>2- نہیں<br>3- لاگو نہیں ہوتا                        | کیا یہ درد آپکو سیرھیاں چڑھنے یا تیز چلنے سے ہوتا ہے؟       | c |
| <input type="checkbox"/> | 1- ہاں<br>2- نہیں                                             | کیا ہموار زمین پر معمول کی رفتار سے چلنے سے یہ درد ہوتا ہے؟ | d |
| <input type="checkbox"/> | 1- ہاں<br>2- نہیں                                             | کیا یہ درد چلنے کے دوران ہی عائب ہو جاتا ہے؟                | e |
| <input type="checkbox"/> | 1- رک جاتے ہیں یا آہستہ ہو جاتے ہیں<br>2- چلنا جاری رکھتے ہیں | اگر یہ درد چلنے کے دوران ہو تو آپ کیا کرتے ہیں؟             | f |
| <input type="checkbox"/> | 1- درد ٹھیک ہو جاتا ہے<br>2- ٹھیک نہیں ہوتا                   | اگر درد ہو اور آپ ایک جگہ کھڑے رہیں تو کیا ہوتا ہے؟         | g |
| <input type="checkbox"/> | 1- دس منٹ یا کم<br>2- دس منٹ سے زیادہ                         | اگر درد ٹھیک ہو جاتا ہے تو کتنی جلدی؟                       | h |

### III- HEART FAILURE

#### دل کی خرابی (ہارٹ فیل)

|                          |                                         |                                                                                                         |   |
|--------------------------|-----------------------------------------|---------------------------------------------------------------------------------------------------------|---|
| <input type="checkbox"/> | 1- ہاں<br>2- نہیں                       | کیا آپ جسمانی معذوری کے باعث چل نہیں پاتے؟                                                              | a |
| <input type="checkbox"/> | 1- ہاں<br>2- نہیں                       | کیا آپکی سانس اس وقت پھولتی ہے جب آپ ہموار سطح پر معمول کی رفتار سے اپنے ہم عمر لوگوں کے ہمراہ چلتے ہیں | b |
| <input type="checkbox"/> | 1- ہاں<br>2- نہیں                       | کیا آپکی سانس آپکے ہم عمر لوگوں کی نسبت زیادہ پھولتی ہے جب چڑھائی پر چل رہے ہوں یا سیرھیاں چڑھ رہے ہوں؟ | c |
| <input type="checkbox"/> | 1- ہاں<br>2- نہیں                       | کیا آپکو کبھی سانس پھولنے کی وجہ سے رکنا پڑا ہے؟                                                        | d |
| <input type="checkbox"/> | 1- ہاں<br>2- نہیں                       | پچھلے کچھ سالوں میں کیا آپکی کبھی رات میں سانس پھولنے کی وجہ سے آنکھ کھلی ہے؟                           | e |
| <input type="checkbox"/> | 1- ایک سال سے کم<br>2- ایک سال سے زیادہ | یہ مسئلہ آپکو کتنے عرصہ سے ہے؟                                                                          | f |
| <input type="checkbox"/> | 1- ہاں<br>2- نہیں                       | کیا آپکو ٹخنوں میں سوجن ہوتی ہے؟                                                                        | g |
| <input type="checkbox"/> | 1- ہاں<br>2- نہیں                       | کیا آپکو کبھی کسی معالج نے بتایا ہے کہ آپکو پھپھروں کی بیماری لاحق ہے مثلاً COPD، وغیرہ۔                | h |

|                                                                                                      |                                                                                  |                                                                                                         |   |
|------------------------------------------------------------------------------------------------------|----------------------------------------------------------------------------------|---------------------------------------------------------------------------------------------------------|---|
| <input type="checkbox"/>                                                                             | 1- ہاں<br>2- نہیں                                                                | ..... کیا آپ کے دل میں کوئی آگ لگا ہوا ہے؟                                                              | i |
| <input type="checkbox"/>                                                                             | 1- سٹینڈرڈ پیس میکر<br>2- آئی، سی، ڈی<br>3- سی آر ٹی، ڈی                         | ..... اگر ہاں تو کونسا آگ لگا ہوا ہے؟                                                                   | j |
| <b>PART-D</b>                                                                                        |                                                                                  |                                                                                                         |   |
| <b>COMPLICATIONS</b>                                                                                 |                                                                                  |                                                                                                         |   |
| <b>بہرہ سجد گئیاں</b>                                                                                |                                                                                  |                                                                                                         |   |
| نیچے دیئے گئے سیکشن صرف اسی صورت میں مکمل کریں اگر ذیابیطس اشوگر سے متعلق Part-B سیکشن II پر کیا ہو۔ |                                                                                  |                                                                                                         |   |
| <b>I- FOOT ULCERS AND AMPUTATION</b>                                                                 |                                                                                  |                                                                                                         |   |
| <b>پاؤں کا زخم اور ضائع ہونا</b>                                                                     |                                                                                  |                                                                                                         |   |
| <input type="checkbox"/>                                                                             | 1- ہاں<br>2- نہیں                                                                | ..... کیا آپ کو کبھی پاؤں میں ایسا زخم یا چھالہ ہوا ہے جسکو ٹھیک ہونے میں چار ہفتے سے زیادہ وقت لگا ہو؟ | a |
| <input type="checkbox"/>                                                                             | 1- ہاں<br>2- نہیں                                                                | ..... کیا آپ ننگے پاؤں چلتے پھرتے ہیں؟                                                                  | b |
| <input type="checkbox"/>                                                                             | 1- ہاں<br>2- نہیں                                                                | ..... کیا آپ کے جسم کا کوئی حصہ کاٹا گیا ہے؟                                                            | c |
| <input type="checkbox"/>                                                                             | (اگر جواب 2، تو II part پر جائیں)                                                | ..... اگر ہاں تو کب.....                                                                                | d |
| <input type="checkbox"/>                                                                             | 1- انگوٹھا (پاؤں کا)<br>2- ٹخنوں سے نیچے<br>3- گھٹنے سے نیچے<br>4- گھٹنے کے اوپر | ..... کونسا حصہ کاٹا گیا؟                                                                               | e |
| <input type="checkbox"/>                                                                             | 1- چوٹ لگنا<br>2- شوگر / ذیابیطس<br>3- انفیکشن<br>4- دیگر                        | ..... کاٹنے کی کیا وجہ تھی؟                                                                             | f |
| <input type="checkbox"/>                                                                             | 1- ہاں<br>2- نہیں<br>3- پتہ نہیں                                                 | ..... کیا آپ کے پاس طبی ریکارڈ یا نسخے موجود ہیں؟                                                       | g |
| <input type="checkbox"/>                                                                             | تشخیص:-                                                                          | ..... اگر جواب ہاں ہے تو جواب دہندہ سے طبی ریکارڈ یا نسخے دیکھانے کیلئے ہمیں اور تشخیص نوٹ کریں         | h |



## II- EYES

### آنکھیں

|                          |                               |                                                                                                   |   |
|--------------------------|-------------------------------|---------------------------------------------------------------------------------------------------|---|
| <input type="checkbox"/> | 1-ہاں<br>2-نہیں               | کیا آپ کو دیکھنے میں کوئی مشکل یا دشواری ہوتی ہے (علاوہ آپکے عام چشموں کے)                        | a |
| <input type="checkbox"/> | 1-ہاں<br>2-نہیں               | اگر ہاں تو کیا آپ کو بتایا گیا ہے کہ آپکی نظر کی کمزوری شوگر / ذیابیطس کی پیچیدگیوں کی وجہ سے ہے؟ | b |
|                          |                               | اگر ہاں تو کیا تشخیص تھی؟                                                                         | c |
| <input type="checkbox"/> | 1-ہاں<br>2-نہیں               | کیا آپ کو آپکی آنکھوں کا کبھی شعاعوں (laser) سے علاج کروانا پڑا؟                                  | d |
| <input type="checkbox"/> | 1-ہاں<br>2-نہیں<br>3-پتہ نہیں | کیا آپکے پاس طبی ریکارڈ یا نسخے موجود ہیں؟                                                        | e |
|                          | تشخیص:-                       | اگر جواب ہاں ہے تو جواب دہندہ سے طبی ریکارڈ یا نسخے دیکھانے کیلئے کہیں اور تشخیص نوٹ کریں         | f |

## PART-E

### RESPIRATORY DISEASE

### سانس کی بیماریاں

|                          |                 |                                                                                                                                                                                      |     |
|--------------------------|-----------------|--------------------------------------------------------------------------------------------------------------------------------------------------------------------------------------|-----|
| <input type="checkbox"/> | 1-ہاں<br>2-نہیں | پچھلے ایک سال میں آپکو ایسی مھانسی یا بلغم بننے کی شکایت رہی ہے جو تین ماہ سے زیادہ رہی ہو؟<br>* کھانسی کا مطلب ہے بغیر زلے، زکام کے کھانسی رہنا بھٹنے کی زیادہ ترددوں اور راتوں میں | 1   |
|                          |                 | اگر ہاں تو.....                                                                                                                                                                      | a   |
| <input type="checkbox"/> |                 | پچھلے بارہ مہینوں میں اسطرح کی کھانسی کتنی دفعہ ہوئی؟                                                                                                                                | i   |
| <input type="checkbox"/> | 1-ہاں<br>2-نہیں | کیا پچھلے بارہ مہینوں میں آپکو کوئی انفیکشن ہوا جس کیلئے آپکو طبی توجہ کی ضرورت پڑی ہو؟                                                                                              | ii  |
| <input type="checkbox"/> |                 | پچھلے بارہ مہینوں میں آپ نے کتنی بار معالج سے رجوع کیا؟                                                                                                                              | iii |
| <input type="checkbox"/> | 1-ہاں<br>2-نہیں | کیا پچھلے بارہ مہینوں میں آپ نے کسی طبی ماہر یا معالج سے سینے کے انفیکشن (علاوہ ٹی۔بی) کیلئے رجوع کیا ہے؟                                                                            | 2   |
|                          |                 | اگر ہاں تو.....                                                                                                                                                                      | a   |
| <input type="checkbox"/> |                 | پچھلے بارہ مہینوں میں اسطرح کتنی دفعہ ہوا؟                                                                                                                                           | i   |
| <input type="checkbox"/> | تعداد           | ان میں سے کتنے، کسی طبی ماہر / ڈاکٹر نے تشخیص کیے؟                                                                                                                                   | ii  |
| <input type="checkbox"/> | سال<br>مہینے    | یہ انفیکشن آپکو کتنے عرصے سے ہو رہے ہیں؟                                                                                                                                             | iii |

|     |                                                                                                                       |                                                                                                         |
|-----|-----------------------------------------------------------------------------------------------------------------------|---------------------------------------------------------------------------------------------------------|
| iv  | کیا آپ نے ان انفیکشن کیلئے کوئی انٹی بائیوٹک ادویات استعمال کی؟.....<br>1-ہاں<br>2- نہیں<br>3- پتہ نہیں               | <input type="checkbox"/>                                                                                |
| 3   | کیا پچھلے بارہ مہینوں میں کبھی سینے کے انفیکشن / نمونیا کیلئے ہسپتال میں داخل ہوئے ہیں؟.....<br>1-ہاں<br>2- نہیں      | <input type="checkbox"/><br>(اگر جواب 2، ہے تو سوال 4 پر جائیں)                                         |
|     | اگر ہاں تو کتنے عرصہ کیلئے.....                                                                                       | دن<br>ہفتے<br>مہینے<br><input type="checkbox"/><br><input type="checkbox"/><br><input type="checkbox"/> |
| 4   | کیا آپ کو آسٹما (Asthma) کی شکایت ہے؟.....<br>1-ہاں<br>2- نہیں                                                        | <input type="checkbox"/><br>(اگر جواب 2، ہے تو سوال 5 پر جائیں)                                         |
| a   | اگر ہاں تو.....                                                                                                       |                                                                                                         |
| I   | پچھلے بارہ مہینوں میں دسے کے کتنے دورے پڑے ہیں؟.....                                                                  | <input type="checkbox"/>                                                                                |
| II  | کیا پچھلے بارہ مہینوں میں آپ کو کوئی انفیکشن رہا جس کیلئے طبی ماہر / ڈاکٹر سے رجوع کرنا پڑا؟.....<br>1-ہاں<br>2- نہیں | <input type="checkbox"/>                                                                                |
| III | پچھلے بارہ مہینوں میں آپ کو کوئی کتنی دفعہ طبی ماہر / ڈاکٹر سے رجوع کرنا پڑا؟.....                                    | <input type="checkbox"/>                                                                                |
| 5   | کیا پچھلے 5 سالوں میں آپ کو کبھی ٹی۔ بی کی تشخیص کی گئی؟.....<br>1-ہاں<br>2- نہیں<br>3- یاد نہیں                      | <input type="checkbox"/>                                                                                |

### PART-F

#### FAMILY HISTORY

#### اہل و عیال (خاندان) سے متعلق سوالات

|   |                                                                                                                                        |                                                                                                              |
|---|----------------------------------------------------------------------------------------------------------------------------------------|--------------------------------------------------------------------------------------------------------------|
| 1 | کیا اچکے خاندان میں کسی کو ان میں سے کوئی بیماری 60 سال کی عمر سے پہلے ہوئی ہے؟                                                        |                                                                                                              |
|   | 1-ہاں 2-نہیں 3-پتہ نہیں<br>بلڈ پریشر<br>*دل کی بیماری<br>شوگر / ذیابیطس<br>فلج<br>*انجائنا، دل کا دورہ، لورڈول کی خرابی (بارٹ فل ہونا) | <input type="checkbox"/><br><input type="checkbox"/><br><input type="checkbox"/><br><input type="checkbox"/> |
| 2 | نیچے دئے گئے ٹیبل کو پُر کریں                                                                                                          |                                                                                                              |
|   | فرد سے رشتہ                                                                                                                            | *بیماری (نیچے دئے گئے کوڈز سے رجوع کریں)                                                                     |
|   | والد                                                                                                                                   | تشخیص کے وقت عمر                                                                                             |
|   | والدہ                                                                                                                                  | اگر وفات پانچے ہیں تو کس عمر میں فوت ہوئے                                                                    |
|   | بیٹا                                                                                                                                   |                                                                                                              |

|  |  |  |        |
|--|--|--|--------|
|  |  |  | بیٹ    |
|  |  |  | داوا   |
|  |  |  | دادی   |
|  |  |  | نانا   |
|  |  |  | نانی   |
|  |  |  | بھائی  |
|  |  |  | بھن    |
|  |  |  | چچا    |
|  |  |  | پھوپھی |
|  |  |  | ماسوں  |
|  |  |  | خالہ   |

ان کے علاوہ مزید رشتہ داروں سے رشتہ اور معلومات نیچے درج کریں۔  
 1\* شوگر / ذیابیطس 2- دل کی بیماری 3- بلڈ پریشر 4- فالج

|  |  |  |  |
|--|--|--|--|
|  |  |  |  |
|  |  |  |  |

### SECTION-6

#### TREATMENT HISTORY AND EXPENDITURES

علاج معالجے کی تفصیلات اور اخراجات

#### PART-A

#### OUTPATIENT

بیرونی مریض

|                          |                                 |                                                             |   |
|--------------------------|---------------------------------|-------------------------------------------------------------|---|
|                          |                                 | کیا آپ ان بیماریوں میں سے کسی کیلئے علاج کروا رہے ہیں؟..... | 1 |
|                          | 1- ہاں 2- نہیں                  |                                                             |   |
| <input type="checkbox"/> | دل کی بیماری                    |                                                             |   |
| <input type="checkbox"/> | فالج                            |                                                             |   |
| <input type="checkbox"/> | شوگر / ذیابیطس                  |                                                             |   |
| <input type="checkbox"/> | شوگر / ذیابیطس کی               |                                                             |   |
| <input type="checkbox"/> | پہچیدگیاں (، انفیکشن آنکھوں اور |                                                             |   |
| <input type="checkbox"/> | گردوں کا مسئلہ وغیرہ)           |                                                             |   |
| <input type="checkbox"/> | بلڈ پریشر                       |                                                             |   |
| <input type="checkbox"/> | گردوں کی دائمی                  |                                                             |   |
|                          | (chronic) بیماری                |                                                             |   |

|  |                                                        |                                                                                                                                                                        |
|--|--------------------------------------------------------|------------------------------------------------------------------------------------------------------------------------------------------------------------------------|
|  |                                                        | اگر اوپر میں سے کسی کا جواب ہاں ہے تو اگلے سیکشن پر جائیں ورنہ Part-B پر جائیں                                                                                         |
|  |                                                        | اب میں آپ سے پچھلے بارہ مہینوں کے علاج اور اس کے اخراجات کے بارے میں پوچھوں گا/گی۔                                                                                     |
|  |                                                        | پچھلے بارہ مہینوں میں آپ کتنی مرتبہ کسی مرکز صحت، ہسپتال یا کسی ڈاکٹر کے کلینک گئے ہیں؟                                                                                |
|  |                                                        | آپ کون سے مرکز صحت، ہسپتال یا کسی ڈاکٹر کے پاس گئے؟.....                                                                                                               |
|  | 1- سرکاری<br>2- نجی (پرائیویٹ)<br>3- خیراتی<br>4- دیگر |                                                                                                                                                                        |
|  | دیگر کی وضاحت کریں<br>.....                            |                                                                                                                                                                        |
|  |                                                        | اب آپ اس خرچے کی تفصیل بتائیں جا آپ کا اوپر بتائے گئے ہسپتال، مرکز صحت یا ڈاکٹر کے کلینک جانے پر ہوا۔ سوال نمبر 1- میں درج بیماریوں کے خرچے کی تفصیل الگ الگ نوٹ کریں۔ |
|  |                                                        | بیماری.....                                                                                                                                                            |
|  |                                                        | 4i                                                                                                                                                                     |
|  |                                                        | خرچے کی نوعیت                                                                                                                                                          |
|  | کتنی مرتبہ                                             | خرچے (روپوں میں)                                                                                                                                                       |
|  |                                                        | ڈاکٹر کی فیس                                                                                                                                                           |
|  |                                                        | زس یا کسی دیکھ بھال کرنے والے فرد کو کتنے مہینے تک گھر میں رکھا                                                                                                        |
|  |                                                        | ٹیٹ                                                                                                                                                                    |
|  |                                                        | جسمانی بجالی (مثلاً فریو تھراپی)                                                                                                                                       |
|  |                                                        | دیگر (وضاحت کریں)                                                                                                                                                      |
|  |                                                        | ادویات (پچھلے بارہ مہینوں میں اوپر بتائی گئی بیماری کی ادویات پر خرچ ہونے والی اوسط رقم)                                                                               |
|  |                                                        | پچھلے بارہ مہینوں کا کل خرچہ                                                                                                                                           |
|  |                                                        | بیماری.....                                                                                                                                                            |
|  |                                                        | 4ii                                                                                                                                                                    |
|  |                                                        | خرچے کی نوعیت                                                                                                                                                          |
|  | کتنی مرتبہ                                             | خرچے (روپوں میں)                                                                                                                                                       |
|  |                                                        | ڈاکٹر کی فیس                                                                                                                                                           |
|  |                                                        | زس یا کسی دیکھ بھال کرنے والے فرد کو کتنے مہینے تک گھر میں رکھا                                                                                                        |
|  |                                                        | ٹیٹ                                                                                                                                                                    |
|  |                                                        | جسمانی بجالی (مثلاً فریو تھراپی)                                                                                                                                       |
|  |                                                        | دیگر (وضاحت کریں)                                                                                                                                                      |
|  |                                                        | ادویات (پچھلے بارہ مہینوں میں اوپر بتائی گئی بیماری کی ادویات پر خرچ ہونے والی اوسط رقم)                                                                               |
|  |                                                        | پچھلے بارہ مہینوں کا کل خرچہ                                                                                                                                           |
|  |                                                        | بیماری.....                                                                                                                                                            |
|  |                                                        | 4iii                                                                                                                                                                   |
|  |                                                        | خرچے کی نوعیت                                                                                                                                                          |
|  | کتنی مرتبہ                                             | خرچے (روپوں میں)                                                                                                                                                       |
|  |                                                        | ڈاکٹر کی فیس                                                                                                                                                           |
|  |                                                        | زس یا کسی دیکھ بھال کرنے والے فرد کو کتنے مہینے تک گھر میں رکھا                                                                                                        |

|  |                                                      |                                                                                                                                                                                                                                   |     |
|--|------------------------------------------------------|-----------------------------------------------------------------------------------------------------------------------------------------------------------------------------------------------------------------------------------|-----|
|  |                                                      | ٹیٹ                                                                                                                                                                                                                               |     |
|  |                                                      | جسمانی بحالی (مثلاً فزیو تھراپی)                                                                                                                                                                                                  |     |
|  |                                                      | دیگر (وضاحت کریں)                                                                                                                                                                                                                 |     |
|  |                                                      | ادویات (پچھلے بارہ مہینوں میں اوپر بتائی گئی بیماری کی ادویات پر خرچ ہونے والی اوسط رقم)                                                                                                                                          |     |
|  |                                                      | پچھلے بارہ مہینوں کا کل خرچہ                                                                                                                                                                                                      |     |
|  |                                                      | بیماری.....                                                                                                                                                                                                                       | 4iv |
|  | خرچہ (روپوں میں)                                     | خرچے کی نوعیت                                                                                                                                                                                                                     |     |
|  | کتنی مرتبہ                                           | ڈاکٹر کی فیس                                                                                                                                                                                                                      |     |
|  |                                                      | زس یا کسی دیکھ بھال کرنے والے فرد کو کتنے مہینے تک گھر میں رکھا                                                                                                                                                                   |     |
|  |                                                      | ٹیٹ                                                                                                                                                                                                                               |     |
|  |                                                      | جسمانی بحالی (مثلاً فزیو تھراپی)                                                                                                                                                                                                  |     |
|  |                                                      | دیگر (وضاحت کریں)                                                                                                                                                                                                                 |     |
|  |                                                      | ادویات (پچھلے بارہ مہینوں میں اوپر بتائی گئی بیماری کی ادویات پر خرچ ہونے والی اوسط رقم)                                                                                                                                          |     |
|  |                                                      | پچھلے بارہ مہینوں کا کل خرچہ                                                                                                                                                                                                      |     |
|  | 1- ہاں<br>2- نہیں<br>3- پتہ نہیں<br>4- کوئی بیہ نہیں | کیا آپکو اوپر بتائے گئے خرچے میں سے سیرہ کمپنی کی طرف سے کچھ رقم واپس کی گئی؟.....                                                                                                                                                | 5   |
|  | رقم.....                                             | اگر ہاں تو اوپر بتائے خرچے میں سے کتنی رقم آپکو واپس کی گئی                                                                                                                                                                       | 6   |
|  | منٹ<br>گھنٹے                                         | آپکو گھر سے ہسپتال، مرکز صحت یا ڈاکٹر کے کلینک تک پہنچنے میں عام طور پر کتنا وقت لگا؟.....                                                                                                                                        | 7   |
|  | رقم.....                                             | اوپر بتائے گئے ہسپتال، مرکز صحت یا ڈاکٹر کے کلینک تک جانے کا کرایہ یا گاڑی کا خرچہ *<br>(اگر سٹڈی میں شرکت کرنے والے کے پاس اپنی گاڑی ہے تو اس سے پوچھیں کہ مندرجہ بالا جگہوں تک جانے کیلئے پیٹرول، ڈیزل یا گیس کا کتنا خرچہ ہوا) | 8   |
|  | منٹ<br>گھنٹے                                         | ہسپتال، مرکز صحت یا ڈاکٹر کے کلینک پر اوسط وقت کتنا لگا؟.....                                                                                                                                                                     | 9   |
|  | 1- ہاں<br>2- نہیں                                    | کیا آپکو صحیح علاج کی سہولت مل رہی ہے؟.....                                                                                                                                                                                       | 10  |

|                                                                                                                                                                                                                                                                                                                                                                                                                                          |                                                                                           |
|------------------------------------------------------------------------------------------------------------------------------------------------------------------------------------------------------------------------------------------------------------------------------------------------------------------------------------------------------------------------------------------------------------------------------------------|-------------------------------------------------------------------------------------------|
| <p>1- دستیاب نہیں</p> <p>2- مجھے وہاں تک لے جانے والا کوئی نہیں</p> <p>3- بہت دور ہے</p> <p>4- بہت مہنگا ہے</p> <p>5- پیسے خرچ نہیں کرنا چاہتے</p> <p>6- علاج کرانے کا طریقہ کار بہت پیچیدہ ہے</p> <p>7- بہت زیادہ انتظار کرنا پڑتا ہے</p> <p>8- اتنے زیادہ بیمار ہیں کہ وہاں تک جا نہیں سکتے</p> <p>9- طبی سہولتوں کی فراہمی پر اعتماد نہیں کرتے</p> <p>10- پتہ نہیں کہ کہاں پر جانا ہے</p> <p>11- دیگر</p> <p>(دیگر کی وضاحت کریں)</p> | <p>10a</p> <p>اگر نہیں تو</p> <p>کسی وجہ سے آپکو صحیح علاج کی سہولت نہیں مل رہی؟.....</p> |
| <p>1- ہاں 2- نہیں</p> <p>1- اپنی بچت سے</p> <p>2- گھر والوں نے دیا</p> <p>3- جہاں کام کرتے ہیں انہوں نے دیا</p> <p>4- دوست، رشتہ دار یا جہاں کام کرتے ہیں ان سے قرضہ لیا</p> <p>5- بینک سے قرضہ لیا</p> <p>6- گھر، زمین یا کوئی چیز بیچی</p> <p>7- صحت کا بیمہ</p> <p>8- دیگر</p> <p>(دیگر کی وضاحت کریں)</p>                                                                                                                            | <p>11</p> <p>آپنے اپنے علاج اور علاج کیلئے آنے والے کا خرچہ کہاں سے ادا کیا؟.....</p>     |



|                                                                                                                                                                                                                                                                                                              |                                                                                                                                                                                                         |                                                                                                                                                                 |   |
|--------------------------------------------------------------------------------------------------------------------------------------------------------------------------------------------------------------------------------------------------------------------------------------------------------------|---------------------------------------------------------------------------------------------------------------------------------------------------------------------------------------------------------|-----------------------------------------------------------------------------------------------------------------------------------------------------------------|---|
| <input type="checkbox"/><br>(اگر جواب 2، ہے part.c پر جائیں)                                                                                                                                                                                                                                                 | 1- ہاں<br>2- نہیں<br>3- یاد نہیں                                                                                                                                                                        | کیا پچھلے 12 مہینوں میں آپ کا کوئی آپریشن ہوا ہے؟.....                                                                                                          | 4 |
| <input type="checkbox"/><br><input type="checkbox"/><br><input type="checkbox"/><br><input type="checkbox"/><br><input type="checkbox"/><br><input type="checkbox"/><br><input type="checkbox"/><br><input type="checkbox"/><br><input type="checkbox"/><br><input type="checkbox"/><br>(دیگر کی وضاحت کریں) | 1- ہاں 2- نہیں<br>1- بائی پاس<br>2- دل کے والو کی تبدیلی ادرت<br>3- پیس میکر<br>4- کسی عضوا کا کاٹا جانا<br>5- پھوڑا (بیپ والا)<br>6- گردے کی تبدیلی<br>7- دل کی تبدیلی<br>8- آنکھ کا آپریشن<br>9- دیگر | اگر ہاں تو کونسا آپریشن ہوا تھا؟.....                                                                                                                           | 5 |
| <input type="checkbox"/>                                                                                                                                                                                                                                                                                     | 1- ہاں<br>2- نہیں                                                                                                                                                                                       | کیا آپ کے پاس آپ کے ہسپتال میں داخلے / آپریشن کا طبی ریکارڈ موجود ہے؟.....                                                                                      | 6 |
|                                                                                                                                                                                                                                                                                                              |                                                                                                                                                                                                         | اگر جواب ہاں ہے تو آپ اپنا طبی ریکارڈ دکھائیں۔ ریکارڈ دیکھ کر تشخیص نوٹ کر لیں۔ ہر دفعہ کی بیماری کی وجہ سے ہسپتال میں داخلے اور آپریشن کا الگ الگ اندراج کریں۔ |   |
|                                                                                                                                                                                                                                                                                                              |                                                                                                                                                                                                         | ہسپتال میں داخلہ:-                                                                                                                                              |   |
|                                                                                                                                                                                                                                                                                                              |                                                                                                                                                                                                         |                                                                                                                                                                 |   |
|                                                                                                                                                                                                                                                                                                              |                                                                                                                                                                                                         | آپریشن:-                                                                                                                                                        |   |
|                                                                                                                                                                                                                                                                                                              |                                                                                                                                                                                                         |                                                                                                                                                                 |   |
|                                                                                                                                                                                                                                                                                                              |                                                                                                                                                                                                         | تبصرہ:-                                                                                                                                                         |   |
|                                                                                                                                                                                                                                                                                                              |                                                                                                                                                                                                         |                                                                                                                                                                 |   |
|                                                                                                                                                                                                                                                                                                              |                                                                                                                                                                                                         |                                                                                                                                                                 |   |
|                                                                                                                                                                                                                                                                                                              |                                                                                                                                                                                                         |                                                                                                                                                                 |   |
|                                                                                                                                                                                                                                                                                                              |                                                                                                                                                                                                         |                                                                                                                                                                 |   |
|                                                                                                                                                                                                                                                                                                              |                                                                                                                                                                                                         |                                                                                                                                                                 |   |
|                                                                                                                                                                                                                                                                                                              |                                                                                                                                                                                                         |                                                                                                                                                                 |   |
|                                                                                                                                                                                                                                                                                                              |                                                                                                                                                                                                         |                                                                                                                                                                 |   |
|                                                                                                                                                                                                                                                                                                              |                                                                                                                                                                                                         |                                                                                                                                                                 |   |
|                                                                                                                                                                                                                                                                                                              |                                                                                                                                                                                                         |                                                                                                                                                                 |   |
|                                                                                                                                                                                                                                                                                                              |                                                                                                                                                                                                         |                                                                                                                                                                 |   |



## PART-C

### TREATMENT HISTORY AND EXPENDITURES

#### ہسپتال میں داخلے کی لاگت (خرچہ)

یہ حصہ صرف اس صورت میں پر کریں اگر اسٹڈی میں شرکت کرنے والا کبھی ہسپتال میں داخل ہوا ہو کسی بھی بیماری کی وجہ سے یا Part-B کے سوال نمبر 3 اور 5 میں درج وجوہات کی وجہ سے، بصورت دیگر انٹرویو ختم کر دیں اور اسٹڈی میں شرکت کرنے والے کا شکریہ ادا کریں۔  
پچھلے بارہ مہینوں کے دوران ہر دفعہ ہسپتال میں داخلہ کیلئے مندرجہ ذیل تفصیلات نوٹ کریں۔ اگر 3 سے زیادہ مرتبہ ہسپتال میں داخل ہوئے ہیں تو تفصیل لکھنے کیلئے دوسرا فارم استعمال کریں۔

| نمبر شمار | سوالات                                                                               | 1                                        | 2                                        | 3                                        |
|-----------|--------------------------------------------------------------------------------------|------------------------------------------|------------------------------------------|------------------------------------------|
| 1         | آپ کب ہسپتال میں داخل ہوئے؟.....                                                     | مہینہ                                    | مہینہ                                    | مہینہ                                    |
| 2         | آپ کتنے دن ہسپتال میں رہے؟.....                                                      | دن                                       | دن                                       | دن                                       |
| 3         | کس قسم کا ہسپتال میں تھا؟.....                                                       | 1. ہاں 2. نہیں                           | 1. ہاں 2. نہیں                           | 1. ہاں 2. نہیں                           |
|           |                                                                                      | سرکاری<br>نجی اپرائیوڈ<br>خیراتی<br>دیگر | سرکاری<br>نجی اپرائیوڈ<br>خیراتی<br>دیگر | سرکاری<br>نجی اپرائیوڈ<br>خیراتی<br>دیگر |
| 4         | ہسپتال کا نام (پتہ)                                                                  |                                          |                                          |                                          |
| 5         | کس قسم کا علاج یا آپریشن ہوا؟<br>(طبی ریکارڈ اور پارٹ A کی معلومات کے ساتھ چیک کریں) | 1. ہاں 2. نہیں                           | 1. ہاں 2. نہیں                           | 1. ہاں 2. نہیں                           |
|           |                                                                                      | ادویات                                   | ادویات                                   | ادویات                                   |
|           |                                                                                      | تھرومبولیسز<br>Thrombolysis              | تھرومبولیسز<br>Thrombolysis              | تھرومبولیسز<br>Thrombolysis              |
|           |                                                                                      | انژیوگرام<br>Angiogram                   | انژیوگرام<br>Angiogram                   | انژیوگرام<br>Angiogram                   |
|           |                                                                                      | انژیوپلاسٹی<br>Angioplasty               | انژیوپلاسٹی<br>Angioplasty               | انژیوپلاسٹی<br>Angioplasty               |
|           |                                                                                      | بائی پاس<br>Bypass                       | بائی پاس<br>Bypass                       | بائی پاس<br>Bypass                       |
|           |                                                                                      | بریکی تھراپی<br>Brachytherapy            | بریکی تھراپی<br>Brachytherapy            | بریکی تھراپی<br>Brachytherapy            |
|           |                                                                                      | پیس میکر<br>Pacemaker                    | پیس میکر<br>Pacemaker                    | پیس میکر<br>Pacemaker                    |
|           |                                                                                      | دل کی تبدیلی                             | دل کی تبدیلی                             | دل کی تبدیلی                             |

|                                                                                                                    |                                                                                                                    |                                                                                                                    |                                                                                                        |
|--------------------------------------------------------------------------------------------------------------------|--------------------------------------------------------------------------------------------------------------------|--------------------------------------------------------------------------------------------------------------------|--------------------------------------------------------------------------------------------------------|
| <input type="checkbox"/> عضو کا کاٹا جانا<br>Amputation                                                            | <input type="checkbox"/> عضو کا کاٹا جانا<br>Amputation                                                            | <input type="checkbox"/> عضو کا کاٹا جانا<br>Amputation                                                            |                                                                                                        |
| <input type="checkbox"/> ایکو کارڈیو گرافی<br>Echocardiography                                                     | <input type="checkbox"/> ایکو کارڈیو گرافی<br>Echocardiography                                                     | <input type="checkbox"/> ایکو کارڈیو گرافی<br>Echocardiography                                                     |                                                                                                        |
| <input type="checkbox"/> نیوروا میمنگ<br>Neuro-imaging                                                             | <input type="checkbox"/> نیوروا میمنگ<br>Neuro-imaging                                                             | <input type="checkbox"/> نیوروا میمنگ<br>Neuro-imaging                                                             |                                                                                                        |
| <input type="checkbox"/> ڈیالیسیز<br>Dialysis                                                                      | <input type="checkbox"/> ڈیالیسیز<br>Dialysis                                                                      | <input type="checkbox"/> ڈیالیسیز<br>Dialysis                                                                      |                                                                                                        |
| <input type="checkbox"/> گردے کی تبدیلی                                                                            | <input type="checkbox"/> گردے کی تبدیلی                                                                            | <input type="checkbox"/> گردے کی تبدیلی                                                                            |                                                                                                        |
| <input type="checkbox"/> مشاہدہ کے لیے<br>Observation                                                              | <input type="checkbox"/> مشاہدہ کے لیے<br>Observation                                                              | <input type="checkbox"/> مشاہدہ کے لیے<br>Observation                                                              |                                                                                                        |
| <input type="checkbox"/> دیگر وجوہات<br>دیگر کی وضاحت کریں<br>.....                                                | <input type="checkbox"/> دیگر وجوہات<br>دیگر کی وضاحت کریں<br>.....                                                | <input type="checkbox"/> دیگر وجوہات<br>دیگر کی وضاحت کریں<br>.....                                                |                                                                                                        |
| -----روپے                                                                                                          | -----روپے                                                                                                          | -----روپے                                                                                                          | 6<br>علاج پر کل خرچ شدہ رقم<br>(ہسپتال میں داخلے کا خرچہ + داخلے کے دنوں میں خریدی گئی ادویات کا خرچہ) |
| <input type="checkbox"/> دن                                                                                        | <input type="checkbox"/> دن                                                                                        | <input type="checkbox"/> دن                                                                                        | 7<br>آپ کا کوئی ساتھی یا دیکھ بھال کرنے والا کتنے دن تک آپ کے ساتھ ہسپتال میں ٹھہرا؟                   |
| -----روپے                                                                                                          | -----روپے                                                                                                          | -----روپے                                                                                                          | 8<br>ساتھی لویکھ بھال کرنے والے کا ہسپتال میں خرچہ<br>(خوراک، رہائش اور آنے جانے کا خرچہ)              |
| <input type="checkbox"/> کلومیٹر                                                                                   | <input type="checkbox"/> کلومیٹر                                                                                   | <input type="checkbox"/> کلومیٹر                                                                                   | 9<br>آپ کے گھر سے ہسپتال تک کا فاصلہ کتنا ہے؟                                                          |
| -----روپے                                                                                                          | -----روپے                                                                                                          | -----روپے                                                                                                          | 10<br>گھر سے ہسپتال تک آنے کا ٹرانسپورٹ کا خرچہ<br>(ایمبولینس کے خرچہ کے علاوہ)                        |
| 1- ہاں 2- نہیں<br>مفت علاج<br>تجارتی بیمہ<br>کوئی نہیں<br>خود پیسے دینے ہیں<br>دیگر<br>دیگر کی وضاحت کریں<br>..... | 1- ہاں 2- نہیں<br>مفت علاج<br>تجارتی بیمہ<br>کوئی نہیں<br>خود پیسے دینے ہیں<br>دیگر<br>دیگر کی وضاحت کریں<br>..... | 1- ہاں 2- نہیں<br>مفت علاج<br>تجارتی بیمہ<br>کوئی نہیں<br>خود پیسے دینے ہیں<br>دیگر<br>دیگر کی وضاحت کریں<br>..... | 11<br>آپ کے پاس طبی بیمہ کس قسم کا ہے؟                                                                 |
| -----روپے                                                                                                          | -----روپے                                                                                                          | -----روپے                                                                                                          | 12<br>رقم جو آپ کو صحت کے بیمہ سے واپس ادا کر دی گئی ہو؟                                               |

|                                                                                                                                                                                                                                                                                                                                                                                                                                                                                                                              |                                                                                                                                                                                                                                                                                                                                                                                                                                                                                                                              |                                                                                                                                                                                                                                                                                                                                                                                                                                                                                                                              |                                                                                                 |
|------------------------------------------------------------------------------------------------------------------------------------------------------------------------------------------------------------------------------------------------------------------------------------------------------------------------------------------------------------------------------------------------------------------------------------------------------------------------------------------------------------------------------|------------------------------------------------------------------------------------------------------------------------------------------------------------------------------------------------------------------------------------------------------------------------------------------------------------------------------------------------------------------------------------------------------------------------------------------------------------------------------------------------------------------------------|------------------------------------------------------------------------------------------------------------------------------------------------------------------------------------------------------------------------------------------------------------------------------------------------------------------------------------------------------------------------------------------------------------------------------------------------------------------------------------------------------------------------------|-------------------------------------------------------------------------------------------------|
| <p>1-ہاں 2-نہیں</p> <p><input type="checkbox"/> اپنی بچت سے</p> <p><input type="checkbox"/> گھر والوں نے دیا</p> <p><input type="checkbox"/> جہاں کام کرتے ہیں انہوں نے دیا</p> <p><input type="checkbox"/> کسی دوست، رشتہ دار، یا جہاں کام کرتے ہیں ان سے قرضہ</p> <p><input type="checkbox"/> لیا</p> <p><input type="checkbox"/> بینک سے قرضہ لیا</p> <p><input type="checkbox"/> گھر زمین یا کوئی اور چیز بیچی</p> <p><input type="checkbox"/> صحت کا بیمہ</p> <p><input type="checkbox"/> دیگر (دیگر کی وضاحت کریں)</p> | <p>1-ہاں 2-نہیں</p> <p><input type="checkbox"/> اپنی بچت سے</p> <p><input type="checkbox"/> گھر والوں نے دیا</p> <p><input type="checkbox"/> جہاں کام کرتے ہیں انہوں نے دیا</p> <p><input type="checkbox"/> کسی دوست، رشتہ دار، یا جہاں کام کرتے ہیں ان سے قرضہ</p> <p><input type="checkbox"/> لیا</p> <p><input type="checkbox"/> بینک سے قرضہ لیا</p> <p><input type="checkbox"/> گھر زمین یا کوئی اور چیز بیچی</p> <p><input type="checkbox"/> صحت کا بیمہ</p> <p><input type="checkbox"/> دیگر (دیگر کی وضاحت کریں)</p> | <p>1-ہاں 2-نہیں</p> <p><input type="checkbox"/> اپنی بچت سے</p> <p><input type="checkbox"/> گھر والوں نے دیا</p> <p><input type="checkbox"/> جہاں کام کرتے ہیں انہوں نے دیا</p> <p><input type="checkbox"/> کسی دوست، رشتہ دار، یا جہاں کام کرتے ہیں ان سے قرضہ</p> <p><input type="checkbox"/> لیا</p> <p><input type="checkbox"/> بینک سے قرضہ لیا</p> <p><input type="checkbox"/> گھر زمین یا کوئی اور چیز بیچی</p> <p><input type="checkbox"/> صحت کا بیمہ</p> <p><input type="checkbox"/> دیگر (دیگر کی وضاحت کریں)</p> | <p>13</p> <p>ہسپتال میں داخلے کا خرچہ آپ کس طرح ادا کرتے ہیں؟.....</p>                          |
| <p>اپنی بچت سے.....%</p> <p>گھر والوں نے دیا.....%</p> <p>جہاں کام کرتے ہیں انہوں نے دیا.....%</p> <p>کسی دوست، رشتہ دار، یا جہاں کام کرتے ہیں ان سے قرضہ لیا.....%</p> <p>بینک سے قرضہ لیا.....%</p> <p>گھر زمین یا کوئی اور چیز بیچی.....%</p> <p>صحت کا بیمہ.....%</p> <p>دیگر.....% (دیگر کی وضاحت کریں)</p>                                                                                                                                                                                                             | <p>اپنی بچت سے.....%</p> <p>گھر والوں نے دیا.....%</p> <p>جہاں کام کرتے ہیں انہوں نے دیا.....%</p> <p>کسی دوست، رشتہ دار، یا جہاں کام کرتے ہیں ان سے قرضہ لیا.....%</p> <p>بینک سے قرضہ لیا.....%</p> <p>گھر زمین یا کوئی اور چیز بیچی.....%</p> <p>صحت کا بیمہ.....%</p> <p>دیگر.....% (دیگر کی وضاحت کریں)</p>                                                                                                                                                                                                             | <p>اپنی بچت سے.....%</p> <p>گھر والوں نے دیا.....%</p> <p>جہاں کام کرتے ہیں انہوں نے دیا.....%</p> <p>کسی دوست، رشتہ دار، یا جہاں کام کرتے ہیں ان سے قرضہ لیا.....%</p> <p>بینک سے قرضہ لیا.....%</p> <p>گھر زمین یا کوئی اور چیز بیچی.....%</p> <p>صحت کا بیمہ.....%</p> <p>دیگر.....% (دیگر کی وضاحت کریں)</p>                                                                                                                                                                                                             | <p>14</p> <p>اپنے ہسپتال میں داخلہ کے خرچہ کا کتنے فیصد آپ نے مندرجہ بالا ذرائع سے ادا کیا؟</p> |
|                                                                                                                                                                                                                                                                                                                                                                                                                                                                                                                              | <p><input type="checkbox"/> گھنٹے</p>                                                                                                                                                                                                                                                                                                                                                                                                                                                                                        | <p><input type="checkbox"/> منٹ</p>                                                                                                                                                                                                                                                                                                                                                                                                                                                                                          | <p>15</p> <p>انٹرویو ختم ہونے کا وقت</p>                                                        |

**CARRS: SURVEILLANCE STUDY**  
**BLOOD PRESSURE AND ANTHROPOMETRY**

Participant ID

Interviewer I

Date Completed:

DD / MM / YY

**I. BLOOD PRESSURE AND PULSE**

Instrument ID

| Type of Measurement | 1 <sup>st</sup> Reading                                        | 2 <sup>nd</sup> Reading                                        | Difference between 1 <sup>st</sup> and 2 <sup>nd</sup>         | Tolerance | 3 <sup>rd</sup> Reading (If necessary)                         |
|---------------------|----------------------------------------------------------------|----------------------------------------------------------------|----------------------------------------------------------------|-----------|----------------------------------------------------------------|
| Systolic BP         | <input type="text"/> <input type="text"/> <input type="text"/> | <input type="text"/> <input type="text"/> <input type="text"/> | <input type="text"/> <input type="text"/> <input type="text"/> | 10 mm Hg  | <input type="text"/> <input type="text"/> <input type="text"/> |
| Diastolic BP        | <input type="text"/> <input type="text"/> <input type="text"/> | <input type="text"/> <input type="text"/> <input type="text"/> | <input type="text"/> <input type="text"/> <input type="text"/> | 6 mm Hg   | <input type="text"/> <input type="text"/> <input type="text"/> |
| Pulse rate          | <input type="text"/> <input type="text"/> <input type="text"/> | <input type="text"/> <input type="text"/> <input type="text"/> |                                                                |           |                                                                |

**II. ANTHROPOMETRIC MEASUREMENTS**

|                                                                                                                               |                                                                                                                               |                                                                                                                               |                                                                                     |                                                                                                                               |                                                                                                                               |
|-------------------------------------------------------------------------------------------------------------------------------|-------------------------------------------------------------------------------------------------------------------------------|-------------------------------------------------------------------------------------------------------------------------------|-------------------------------------------------------------------------------------|-------------------------------------------------------------------------------------------------------------------------------|-------------------------------------------------------------------------------------------------------------------------------|
| <b>1. Height (cm)</b>                                                                                                         |                                                                                                                               | Instrument ID <input type="text"/> <input type="text"/>                                                                       |                                                                                     |                                                                                                                               |                                                                                                                               |
| Standing Height                                                                                                               | <input type="text"/> <input type="text"/> <input type="text"/> <input type="text"/> <input type="text"/> <input type="text"/> | Comments:                                                                                                                     |                                                                                     |                                                                                                                               |                                                                                                                               |
| <b>2. Body circumferences (cm)</b>                                                                                            |                                                                                                                               | Instrument ID <input type="text"/> <input type="text"/>                                                                       |                                                                                     |                                                                                                                               |                                                                                                                               |
| Mid-arm                                                                                                                       | Clothing (√)                                                                                                                  | Waist                                                                                                                         | Clothing (√)                                                                        | Hip                                                                                                                           | Clothing (√)                                                                                                                  |
| <input type="text"/> <input type="text"/> <input type="text"/> <input type="text"/> <input type="text"/> <input type="text"/> | None <input type="checkbox"/>                                                                                                 | <input type="text"/> <input type="text"/> <input type="text"/> <input type="text"/> <input type="text"/> <input type="text"/> | None <input type="checkbox"/>                                                       | <input type="text"/> <input type="text"/> <input type="text"/> <input type="text"/> <input type="text"/> <input type="text"/> | None <input type="checkbox"/>                                                                                                 |
|                                                                                                                               | Light <input type="checkbox"/>                                                                                                |                                                                                                                               | Light <input type="checkbox"/>                                                      |                                                                                                                               | Light <input type="checkbox"/>                                                                                                |
|                                                                                                                               | Heavy <input type="checkbox"/>                                                                                                |                                                                                                                               | Heavy <input type="checkbox"/>                                                      |                                                                                                                               | Heavy <input type="checkbox"/>                                                                                                |
| <b>3. Skinfold Thickness (mm)</b>                                                                                             |                                                                                                                               | Instrument ID <input type="text"/> <input type="text"/>                                                                       |                                                                                     |                                                                                                                               |                                                                                                                               |
| Type of Measurement                                                                                                           | 1 <sup>st</sup> Reading                                                                                                       | 2 <sup>nd</sup> Reading                                                                                                       | Difference between 1 <sup>st</sup> and 2 <sup>nd</sup>                              | Tolerance                                                                                                                     | 3 <sup>rd</sup> Reading (If necessary)                                                                                        |
| Triceps                                                                                                                       | <input type="text"/> <input type="text"/> <input type="text"/> <input type="text"/> <input type="text"/> <input type="text"/> | <input type="text"/> <input type="text"/> <input type="text"/> <input type="text"/> <input type="text"/> <input type="text"/> | <input type="text"/> <input type="text"/> <input type="text"/> <input type="text"/> | 1 mm                                                                                                                          | <input type="text"/> <input type="text"/> <input type="text"/> <input type="text"/> <input type="text"/> <input type="text"/> |
| Supra-scapular                                                                                                                | <input type="text"/> <input type="text"/> <input type="text"/> <input type="text"/> <input type="text"/> <input type="text"/> | <input type="text"/> <input type="text"/> <input type="text"/> <input type="text"/> <input type="text"/> <input type="text"/> | <input type="text"/> <input type="text"/> <input type="text"/> <input type="text"/> | 1 mm                                                                                                                          | <input type="text"/> <input type="text"/> <input type="text"/> <input type="text"/> <input type="text"/> <input type="text"/> |
| Supra-patellar                                                                                                                | <input type="text"/> <input type="text"/> <input type="text"/> <input type="text"/> <input type="text"/> <input type="text"/> | <input type="text"/> <input type="text"/> <input type="text"/> <input type="text"/> <input type="text"/> <input type="text"/> | <input type="text"/> <input type="text"/> <input type="text"/> <input type="text"/> | 1 mm                                                                                                                          | <input type="text"/> <input type="text"/> <input type="text"/> <input type="text"/> <input type="text"/> <input type="text"/> |

Attach the print-out of body composition / bio-impedance measurement of the participant along with this form. Note any specific comments in the space below.

---



---



---



---

SECTION-7

LABORATORY TESTS RESULTS

| A  | Lab #                                |                         |   |                   |                      |
|----|--------------------------------------|-------------------------|---|-------------------|----------------------|
| 1  | Fasting Glucose                      | <input type="text"/>    | 2 | Serum Cholesterol | <input type="text"/> |
| 3  | HDL                                  | <input type="text"/>    | 4 | LDL               | <input type="text"/> |
| 5  | VLDL                                 | <input type="text"/>    | 6 | Triglycerides     | <input type="text"/> |
| 7  | Serum Urea                           | <input type="text"/>    | 8 | Serum Creatinine  | <input type="text"/> |
| 9  | Hemoglobin A1c                       | <input type="text"/> gm |   |                   | <input type="text"/> |
| 10 | Urine Microalbuminuria(Quantitative) |                         |   |                   | <input type="text"/> |
| 11 | Salivary Cotinine                    | <input type="text"/>    |   |                   |                      |
